# Supplementary material for: Characterization and Experimental Use of Multiple Myeloma Bone Marrow Endothelial Cells and Progenitors
Source: Preprints.org preprint supplement (doi:10.20944/preprints202410.0645.v1), 2024-10-09
Supplement: Supplementary file 1 [file supplementary]

## Sheet: Table S1
gene	p_val	avg_log2FC	pct.1	pct.2	p_val_adj	pAdj_BH	stat	ensembl_gene_id
ANGPT1	NA	1.07497	0.231	0.286	NA	NA	NA	ENSG00000154188
ANTXR1	NA	0.703122	0.077	0	NA	NA	NA	ENSG00000169604
APOE	NA	2.23068	0.769	0.286	NA	NA	NA	ENSG00000130203
BICC1	NA	0.577238	0.077	0.143	NA	NA	NA	ENSG00000122870
CFD	NA	1.77738	0.615	0.571	NA	NA	NA	ENSG00000274619
CFD	NA	1.77738	0.615	0.571	NA	NA	NA	ENSG00000197766
CHL1	NA	0.965607	0.462	0.143	NA	NA	NA	ENSG00000134121
COL14A1	NA	0.995691	0.385	0.143	NA	NA	NA	ENSG00000187955
CXCL12	NA	2.74994	0.923	0.429	NA	NA	NA	ENSG00000107562
CYGB	NA	1.30786	0.692	0.429	NA	NA	NA	ENSG00000161544
DCN	NA	1.36953	0.538	0.286	NA	NA	NA	ENSG00000011465
FBXO17	NA	1.20195	0.231	0.143	NA	NA	NA	ENSG00000282954
FBXO17	NA	1.20195	0.231	0.143	NA	NA	NA	ENSG00000269190
G0S2	NA	-3.06644	0.692	0.429	NA	NA	NA	ENSG00000123689
HOXB8	NA	-0.921203	0.538	0.286	NA	NA	NA	ENSG00000120068
ID4	NA	2.94433	0.692	0.286	NA	NA	NA	ENSG00000172201
IGF2	NA	-0.812117	0.538	0.286	NA	NA	NA	ENSG00000167244
IGFBP3	NA	2.81007	0.692	0.286	NA	NA	NA	ENSG00000146674
IGLC2	NA	2.79044	0.538	0.286	NA	NA	NA	ENSG00000211677
IGLC3	NA	1.1471	0.308	0	NA	NA	NA	ENSG00000211679
IGLC7	NA	-0.256521	0.077	0	NA	NA	NA	ENSG00000211685
ITGA2	NA	0.634743	0.615	0	NA	NA	NA	ENSG00000164171
LEPR	NA	0.705528	0.769	0.571	NA	NA	NA	ENSG00000116678
LYZ	NA	-6.40456	0.308	0.571	NA	NA	NA	ENSG00000090382
MAPK10	NA	0.462946	0.077	0.143	NA	NA	NA	ENSG00000109339
MGP	NA	0.955561	0.692	0.143	NA	NA	NA	ENSG00000111341
MMP1	NA	0.160604	0.077	0	NA	NA	NA	ENSG00000196611
NRXN2	NA	1.15872	0.385	0	NA	NA	NA	ENSG00000110076
PCDH18	NA	1.19926	0.231	0.143	NA	NA	NA	ENSG00000189184
PDGFRB	NA	1.39016	0.154	0.286	NA	NA	NA	ENSG00000113721
PF4	NA	0.0245875	0.385	0.286	NA	NA	NA	ENSG00000163737
PLAC9	NA	1.08967	0.308	0.286	NA	NA	NA	ENSG00000189129
PLAGL1	NA	1.08571	0.231	0.143	NA	NA	NA	ENSG00000118495
PLIN1	NA	0.712542	0.154	0	NA	NA	NA	ENSG00000166819
PPBP	NA	0.546132	0.462	0.143	NA	NA	NA	ENSG00000163736
PPM1N	NA	0.441489	0.769	0.429	NA	NA	NA	ENSG00000213889
PTGDS	NA	1.19235	0.692	0.286	NA	NA	NA	ENSG00000107317
PTGS2	NA	1.3989	0.231	0.143	NA	NA	NA	ENSG00000073756
S100A9	NA	-4.61159	0.462	0.571	NA	NA	NA	ENSG00000163220
SLC7A2	NA	0.928131	0.077	0.286	NA	NA	NA	ENSG00000003989
SORT1	NA	0.638807	0.077	0.143	NA	NA	NA	ENSG00000134243
SOX9	NA	1.33668	0.154	0.143	NA	NA	NA	ENSG00000125398
TAGLN	NA	2.89414	0.462	0.571	NA	NA	NA	ENSG00000149591
TMEM158	NA	0.460028	0.692	0.143	NA	NA	NA	ENSG00000249992
TNC	NA	1.67593	0.385	0.286	NA	NA	NA	ENSG00000041982
TRNP1	NA	0.708945	0.154	0	NA	NA	NA	ENSG00000253368
PXDC1	2.2074e-07	1.667	1	0.857	0.00514038	0.000426274	3.37031	ENSG00000168994
SERPINE1	1.23804e-06	2.83571	0.923	0.143	0.0288302	0.00121861	2.91413	ENSG00000106366
VIM	2.16437e-06	1.8329	1	1	0.0504018	0.00170986	2.76704	ENSG00000026025
LMNA	4.33063e-06	1.23761	1	1	0.100847	0.00228533	2.64105	ENSG00000160789
STC1	4.17736e-06	4.61275	0.923	0.143	0.0972782	0.00228533	2.64105	ENSG00000159167
LUZP1	6.59128e-06	1.09606	1	1	0.153491	0.00316304	2.4999	ENSG00000169641
VAPA	8.94976e-06	0.935443	1	1	0.208413	0.00361737	2.44161	ENSG00000101558
MIR4435-2HG	1.2521e-05	1.53017	0.923	0.714	0.291575	0.00483587	2.31553	ENSG00000172965
EMP1	1.768e-05	1.51742	1	1	0.411714	0.00602507	2.22004	ENSG00000134531
HSP90AB1	1.76031e-05	1.3403	1	1	0.409923	0.00602507	2.22004	ENSG00000096384
ADAMTS9	1.92291e-05	1.64701	1	0.857	0.447787	0.00642694	2.192	ENSG00000163638
TUBB4B	1.98217e-05	1.70681	1	1	0.461589	0.00644846	2.19054	ENSG00000188229
ATP13A3	2.05576e-05	2.73039	0.923	0.714	0.478725	0.00649621	2.18734	ENSG00000133657
TUBB6	2.96221e-05	2.10937	0.923	0.714	0.68981	0.00824932	2.08358	ENSG00000176014
AKAP13	3.38151e-05	1.34706	1	1	0.787453	0.00890465	2.05038	ENSG00000170776
ATP2B1	3.82263e-05	1.23437	0.923	0.857	0.890176	0.0096286	2.01644	ENSG00000070961
EHD4	4.10865e-05	1.81039	0.923	0.571	0.956782	0.0100575	1.99751	ENSG00000103966
ITGA5	4.36056e-05	1.52713	1	1	1	0.0101049	1.99547	ENSG00000161638
PODXL	4.34872e-05	3.00755	1	0.571	1	0.0101049	1.99547	ENSG00000128567
MIR22HG	4.59227e-05	1.23314	1	0.857	1	0.010428	1.9818	ENSG00000282800
MIR22HG	4.59227e-05	1.23314	1	0.857	1	0.010428	1.9818	ENSG00000186594
SNX9	6.90332e-05	1.42612	1	0.857	1	0.0130413	1.88468	ENSG00000130340
ANXA2	8.56267e-05	1.19953	1	0.857	1	0.0156652	1.80506	ENSG00000182718
EFNB1	9.03277e-05	1.64568	1	0.857	1	0.0163362	1.78685	ENSG00000090776
TUBA1C	9.11743e-05	2.31804	1	0.571	1	0.0163362	1.78685	ENSG00000167553
TM4SF1	9.92128e-05	1.38498	0.923	1	1	0.0172432	1.76338	ENSG00000169908
NOP16	0.000107996	2.03994	0.923	0.286	1	0.0175286	1.75625	ENSG00000048162
SQLE	0.000108067	2.10684	0.923	0.429	1	0.0175286	1.75625	ENSG00000104549
NFATC2	0.000115631	1.51459	0.923	0.714	1	0.0182697	1.73827	ENSG00000101096
PMP22	0.000171516	1.78896	0.923	1	1	0.02505	1.60119	ENSG00000109099
ACR	0.000177614	2.29936	0.846	0.429	1	0.0255686	1.59229	ENSG00000291368
ACR	0.000177614	2.29936	0.846	0.429	1	0.0255686	1.59229	ENSG00000100312
PSMD11	0.000198835	1.95925	1	0.571	1	0.0271492	1.56624	ENSG00000108671
DDX21	0.000210017	1.10978	1	1	1	0.0275387	1.56006	ENSG00000165732
SH3BGRL3	0.000216412	1.51959	1	1	1	0.027861	1.555	ENSG00000142669
HS3ST1	0.000220794	2.00333	0.923	0.429	1	0.0280828	1.55156	ENSG00000002587
PSMD12	0.000238381	1.4653	0.923	0.857	1	0.0294726	1.53058	ENSG00000197170
USP12	0.00025414	1.72415	1	0.714	1	0.0304617	1.51625	ENSG00000152484
LRRFIP2	0.000264121	1.37681	1	0.714	1	0.0312274	1.50546	ENSG00000093167
PLPP3	0.000270671	1.1817	1	1	1	0.0316124	1.50014	ENSG00000162407
ITGAV	0.000286661	1.25617	0.923	1	1	0.0332111	1.47872	ENSG00000138448
METRNL	0.000290454	1.66202	1	0.571	1	0.0332111	1.47872	ENSG00000275031
METRNL	0.000290454	1.66202	1	0.571	1	0.0332111	1.47872	ENSG00000176845
EFHD2	0.000299786	0.85879	1	0.857	1	0.0335947	1.47373	ENSG00000142634
PLEKHM2	0.000300515	1.27551	0.923	0.714	1	0.0335947	1.47373	ENSG00000116786
PGF	0.00031853	2.22087	1	0.429	1	0.0346003	1.46092	ENSG00000119630
BZW1	0.000323213	0.859471	1	1	1	0.0346756	1.45998	ENSG00000082153
PSMD2	0.000335822	2.1042	1	0.429	1	0.0353732	1.45133	ENSG00000175166
B3GNT5	0.000382103	1.82491	0.923	0.429	1	0.0395295	1.40308	ENSG00000176597
HERC1	0.000385072	0.914581	1	1	1	0.0396009	1.40229	ENSG00000103657
PNP	0.000400216	1.21701	0.923	1	1	0.0406769	1.39065	ENSG00000291814
PNP	0.000400216	1.21701	0.923	1	1	0.0406769	1.39065	ENSG00000198805
PTMA	0.000399713	0.69698	1	1	1	0.0406769	1.39065	ENSG00000187514
FJX1	0.000415302	2.26659	0.923	0.429	1	0.0414824	1.38214	ENSG00000179431
COL4A1	0.000425199	1.71785	1	0.714	1	0.0422283	1.3744	ENSG00000187498
ARPC5L	0.000451246	1.03304	0.923	1	1	0.0438137	1.35839	ENSG00000136950
SRP14	0.000496973	1.08067	1	1	1	0.0454599	1.34237	ENSG00000140319
MSN	0.000537915	1.29818	0.923	0.857	1	0.047217	1.3259	ENSG00000147065
MYADM	0.000533379	1.36582	1	0.714	1	0.047217	1.3259	ENSG00000179820
VCP	0.000575507	0.909794	1	1	1	0.049031	1.30953	ENSG00000165280
SLK	0.000581204	1.54451	0.923	0.857	1	0.0492748	1.30738	ENSG00000065613
NUTF2	0.000593496	1.24746	1	0.571	1	0.0495003	1.30539	ENSG00000102898
CD276	0.000598333	1.47497	1	0.429	1	0.0495192	1.30523	ENSG00000103855
CTNNB1	0.000613306	1.26878	1	1	1	0.0500435	1.30065	ENSG00000168036
PELI1	0.000613052	1.37746	1	1	1	0.0500435	1.30065	ENSG00000197329
TNFRSF12A	0.000623526	2.37033	1	0.143	1	0.0506396	1.29551	ENSG00000006327
CDK17	0.000654829	1.07544	0.923	0.857	1	0.0519172	1.28469	ENSG00000059758
EIF3A	0.000658352	1.07374	1	1	1	0.0519172	1.28469	ENSG00000107581
PEA15	0.00069917	1.10442	1	0.714	1	0.0532964	1.2733	ENSG00000162734
CCND1	0.000769116	1.73758	0.923	0.714	1	0.0564544	1.2483	ENSG00000110092
YWHAQ	0.000773081	0.749187	1	0.857	1	0.0564544	1.2483	ENSG00000134308
EHD1	0.000807711	2.00488	1	0.571	1	0.0575329	1.24008	ENSG00000110047
YWHAE	0.000816057	0.789988	1	1	1	0.0578901	1.2374	ENSG00000274474
YWHAE	0.000816057	0.789988	1	1	1	0.0578901	1.2374	ENSG00000108953
HK1	0.000875219	1.34054	0.923	0.714	1	0.0609947	1.21471	ENSG00000156515
ITPRIP	0.000886241	1.07817	0.923	1	1	0.061366	1.21207	ENSG00000148841
CDC37	0.000938596	0.796267	1	1	1	0.0631397	1.1997	ENSG00000105401
RAC1	0.000934471	1.14247	1	1	1	0.0631397	1.1997	ENSG00000136238
NRIP1	0.000972336	1.53718	1	0.857	1	0.0642989	1.1918	ENSG00000180530
TXN	0.000991152	1.32544	0.923	1	1	0.0652508	1.18541	ENSG00000136810
SOX7	0.00100992	1.39296	0.923	0.857	1	0.0658554	1.18141	ENSG00000285438
SOX7	0.00100992	1.39296	0.923	0.857	1	0.0658554	1.18141	ENSG00000171056
COPS2	0.00103205	1.59679	1	0.714	1	0.0669294	1.17438	ENSG00000166200
CTNNAL1	0.00106502	2.23759	0.923	0.286	1	0.0680514	1.16716	ENSG00000119326
MARCKS	0.00109572	0.932888	1	1	1	0.0694464	1.15835	ENSG00000277443
LRRC8A	0.00116754	1.14052	1	0.857	1	0.0712522	1.1472	ENSG00000136802
MSANTD3	0.00118256	1.47674	0.923	0.429	1	0.0712522	1.1472	ENSG00000066697
RYBP	0.00118827	1.63549	0.923	0.714	1	0.0712522	1.1472	ENSG00000281766
RYBP	0.00118827	1.63549	0.923	0.714	1	0.0712522	1.1472	ENSG00000163602
SKIL	0.00116682	0.713243	1	0.857	1	0.0712522	1.1472	ENSG00000136603
DSTN	0.00120786	1.06055	1	0.857	1	0.0714037	1.14628	ENSG00000125868
ZBTB43	0.00120654	1.21699	0.923	0.714	1	0.0714037	1.14628	ENSG00000169155
PLK2	0.00122062	1.48934	1	1	1	0.0719132	1.14319	ENSG00000145632
PPP1R15A	0.00125797	0.500728	1	1	1	0.0736146	1.13304	ENSG00000087074
ADGRG1	0.0012895	1.42397	0.923	1	1	0.0744569	1.1281	ENSG00000205336
PDGFA	0.00128602	2.14602	1	0.571	1	0.0744569	1.1281	ENSG00000197461
RIN1	0.0013426	1.5449	0.923	0.857	1	0.0766262	1.11562	ENSG00000174791
GPRC5A	0.00139862	1.78628	0.923	0.714	1	0.0789224	1.1028	ENSG00000013588
ADAM17	0.0014277	1.07865	1	1	1	0.0795303	1.09947	ENSG00000151694
FERMT2	0.00146952	1.52855	1	0.857	1	0.0798134	1.09792	ENSG00000073712
HSPA14	0.00150359	1.17569	1	0.571	1	0.0813978	1.08939	ENSG00000187522
CHST2	0.0015348	2.17684	0.923	0.286	1	0.0820763	1.08578	ENSG00000175040
TNFRSF10A	0.00154685	1.60082	0.923	0.143	1	0.0822149	1.08505	ENSG00000104689
EIF4H	0.00156236	0.80435	1	1	1	0.0825346	1.08336	ENSG00000106682
IRAK2	0.00164219	1.74228	0.923	0.143	1	0.0849442	1.07087	ENSG00000134070
IFNGR2	0.00170868	1.3416	1	0.571	1	0.0866787	1.06209	ENSG00000159128
IFNGR2	0.00170868	1.3416	1	0.571	1	0.0866787	1.06209	ENSG00000262795
ILF3	0.00171062	0.954083	1	1	1	0.0866787	1.06209	ENSG00000129351
PLXNA2	0.00178548	1.08132	0.923	0.714	1	0.0886617	1.05226	ENSG00000076356
ANXA5	0.00195259	1.36279	0.923	0.857	1	0.092443	1.03413	ENSG00000164111
DNTTIP2	0.00201736	0.80117	1	1	1	0.0945061	1.02454	ENSG00000067334
DDX39A	0.00203168	0.715298	1	1	1	0.0946666	1.0238	ENSG00000123136
CORO1C	0.00206104	1.28978	1	0.571	1	0.0954009	1.02045	ENSG00000110880
ADNP2	0.00208261	1.08199	0.923	0.571	1	0.0958841	1.01825	ENSG00000101544
LRRC32	0.00215083	1.27725	0.923	0.714	1	0.0986317	1.00598	ENSG00000137507
BCL2L1	0.00231041	1.77965	0.923	0.714	1	0.104028	0.982849	ENSG00000171552
SPHK1	0.00230946	1.42367	0.923	0.286	1	0.104028	0.982849	ENSG00000176170
KCMF1	0.00234338	1.41423	0.923	0.571	1	0.104969	0.97894	ENSG00000176407
CD59	0.00239821	1.08366	1	1	1	0.106383	0.973129	ENSG00000085063
YBX1	0.00239943	0.56318	1	1	1	0.106383	0.973129	ENSG00000065978
RIOK3	0.00269574	1.40228	1	0.857	1	0.11713	0.931332	ENSG00000101782
UBE2J1	0.00272472	1.12456	1	0.714	1	0.117563	0.929728	ENSG00000198833
JAM3	0.00277981	1.06111	0.923	1	1	0.118414	0.926595	ENSG00000166086
BAZ1A	0.00278903	1.33563	0.923	0.714	1	0.118517	0.92622	ENSG00000198604
CDH5	0.00298039	1.09946	0.923	0.857	1	0.122168	0.913043	ENSG00000179776
TPM3	0.00297014	0.961502	1	0.857	1	0.122168	0.913043	ENSG00000143549
PFDN2	0.00303005	0.978121	1	0.857	1	0.12362	0.907911	ENSG00000143256
SRSF10	0.00306146	1.05256	1	1	1	0.124028	0.906479	ENSG00000188529
SPRED1	0.00321816	1.19933	1	0.857	1	0.128284	0.891829	ENSG00000166068
PRNP	0.00331818	1.26005	0.923	0.571	1	0.130395	0.884738	ENSG00000171867
MAPK8IP1	0.00336799	1.1512	0.846	0.714	1	0.131246	0.881914	ENSG00000121653
OTUD4	0.0033883	1.20789	0.923	0.714	1	0.131448	0.881246	ENSG00000164164
DIAPH1	0.00349408	1.20866	1	0.857	1	0.134352	0.871756	ENSG00000131504
CEP170	0.00357606	1.51129	1	0.714	1	0.136598	0.864557	ENSG00000276725
CEP170	0.00357606	1.51129	1	0.714	1	0.136598	0.864557	ENSG00000143702
DKC1	0.00360076	1.88191	0.846	0.429	1	0.13664	0.864421	ENSG00000130826
ATP6V1F	0.00365241	0.806987	0.923	0.714	1	0.137508	0.861672	ENSG00000128524
MYO1B	0.00365527	1.55559	0.923	0.143	1	0.137508	0.861672	ENSG00000128641
MALL	0.00371238	1.54557	0.923	0.429	1	0.13869	0.857954	ENSG00000144063
EBNA1BP2	0.00373154	1.71084	0.923	0.429	1	0.138874	0.857379	ENSG00000117395
USP3	0.00379395	1.15501	0.923	0.714	1	0.140595	0.852031	ENSG00000140455
HES4	0.00380649	1.99288	1	0.571	1	0.140759	0.851523	ENSG00000188290
NEDD9	0.00389182	0.879214	1	1	1	0.143305	0.84374	ENSG00000111859
NDRG1	0.00392574	1.20388	1	1	1	0.143643	0.842715	ENSG00000104419
YES1	0.0039258	1.2714	1	0.857	1	0.143643	0.842715	ENSG00000176105
PPTC7	0.0039423	1.58572	0.846	0.286	1	0.143873	0.842021	ENSG00000196850
STK10	0.00394864	1.3659	0.923	0.714	1	0.143873	0.842021	ENSG00000072786
SGK1	0.00407826	0.921006	1	1	1	0.145844	0.836112	ENSG00000118515
ERCC1	0.00413666	0.918031	1	0.857	1	0.147091	0.832415	ENSG00000012061
TEAD4	0.00418716	1.44453	0.923	0.714	1	0.147912	0.829996	ENSG00000197905
UCK2	0.00441246	1.46017	0.846	0.286	1	0.153684	0.81337	ENSG00000143179
NOLC1	0.0044564	1.07357	1	0.857	1	0.154595	0.810804	ENSG00000166197
CDV3	0.00449136	0.490988	0.923	1	1	0.154881	0.810003	ENSG00000091527
PNPLA8	0.00448617	1.06955	1	1	1	0.154881	0.810003	ENSG00000135241
AGFG1	0.00465872	1.02889	0.923	0.857	1	0.158451	0.800104	ENSG00000173744
DAPK3	0.00486537	1.50162	0.923	0.429	1	0.16072	0.79393	ENSG00000167657
INSIG1	0.00490368	1.968	0.846	0.429	1	0.160936	0.793346	ENSG00000186480
SNHG15	0.00517836	1.31736	1	0.857	1	0.166359	0.778955	ENSG00000232956
MAPKBP1	0.00521866	1.49821	0.923	0.429	1	0.166728	0.77799	ENSG00000137802
CAMSAP1	0.00532424	1.72327	0.846	0.429	1	0.168246	0.774056	ENSG00000130559
ADAMTS4	0.00549868	1.69933	0.923	0.714	1	0.171883	0.764766	ENSG00000158859
SNW1	0.00552478	1.46007	1	0.571	1	0.17208	0.76427	ENSG00000100603
SLC25A33	0.00558074	0.942477	1	0.714	1	0.172893	0.762222	ENSG00000171612
SMOX	0.00560376	1.56312	0.769	0.286	1	0.17299	0.761979	ENSG00000088826
SPAG9	0.00562788	1.06514	1	1	1	0.17312	0.761654	ENSG00000008294
WBP11	0.00562179	0.752868	1	0.857	1	0.17312	0.761654	ENSG00000084463
GPR4	0.00578465	1.63212	0.846	0.429	1	0.176433	0.753419	ENSG00000177464
GSPT1	0.00590589	1.46927	0.923	0.571	1	0.177893	0.74984	ENSG00000103342
SLC2A1	0.0058842	1.8721	0.846	0.429	1	0.177893	0.74984	ENSG00000117394
UFM1	0.00589325	1.21283	0.923	0.714	1	0.177893	0.74984	ENSG00000120686
MAP7D1	0.00600842	1.19758	0.923	0.571	1	0.179839	0.745117	ENSG00000116871
ATF4	0.0060472	0.774	1	1	1	0.180254	0.744115	ENSG00000128272
CLIC4	0.00603817	1.20961	1	0.571	1	0.180254	0.744115	ENSG00000169504
TOP1	0.00611786	1.11844	1	0.857	1	0.180909	0.74254	ENSG00000198900
PITPNC1	0.00622328	0.928328	0.923	0.714	1	0.182704	0.738253	ENSG00000154217
IPO7	0.00623484	1.62192	0.923	0.429	1	0.182734	0.73818	ENSG00000205339
TAGLN2	0.0063135	0.971607	0.923	1	1	0.184108	0.734927	ENSG00000158710
RAPGEF4	0.00643697	1.2076	0.923	0.571	1	0.18553	0.731586	ENSG00000091428
ZNF787	0.00653189	0.814311	0.923	0.857	1	0.187581	0.726811	ENSG00000142409
NME1	0.0066001	1.67113	0.923	0.429	1	0.188049	0.72573	ENSG00000239672
NUP153	0.00663733	1.60323	1	0.571	1	0.188763	0.724083	ENSG00000124789
YWHAH	0.00690004	0.789	1	1	1	0.192492	0.715587	ENSG00000128245
STK17A	0.00707716	1.12611	1	0.714	1	0.195862	0.708051	ENSG00000164543
SESN2	0.00709604	1.73576	0.923	0.286	1	0.196072	0.707585	ENSG00000285069
SESN2	0.00709604	1.73576	0.923	0.286	1	0.196072	0.707585	ENSG00000130766
MCFD2	0.00717669	1.78566	0.923	0.429	1	0.196118	0.707483	ENSG00000180398
TNFRSF10B	0.00714599	1.17751	1	0.714	1	0.196118	0.707483	ENSG00000120889
CSDE1	0.00743044	0.807166	1	1	1	0.200596	0.697678	ENSG00000009307
VGLL4	0.0075066	0.87908	1	1	1	0.202058	0.694523	ENSG00000144560
ZEB1	0.00767606	1.03751	1	1	1	0.204551	0.689199	ENSG00000148516
ACTB	0.00774165	0.549964	1	1	1	0.205107	0.68802	ENSG00000075624
NCL	0.00776885	0.894738	1	1	1	0.205202	0.687819	ENSG00000115053
PSME4	0.00798826	1.11073	0.923	0.571	1	0.208221	0.681476	ENSG00000068878
LCN6	0.00806329	1.58717	0.769	0.143	1	0.208851	0.680164	ENSG00000267206
PSMC1	0.00818402	0.652214	0.923	0.857	1	0.211036	0.675643	ENSG00000100764
PPP2R1B	0.00824266	0.916916	1	0.714	1	0.211226	0.675254	ENSG00000137713
CXCL8	0.00833743	1.69535	0.923	0.571	1	0.211891	0.673888	ENSG00000169429
TPM4	0.00840938	1.25674	1	1	1	0.211891	0.673888	ENSG00000167460
UPP1	0.00860592	1.05047	0.923	1	1	0.214285	0.669008	ENSG00000183696
PATL1	0.00873301	0.659547	0.846	0.571	1	0.216828	0.663884	ENSG00000166889
EIF4G2	0.00885929	0.451436	1	1	1	0.218714	0.660124	ENSG00000110321
RARA	0.0089445	1.30294	0.923	0.857	1	0.218951	0.659653	ENSG00000131759
GAPDH	0.00903106	0.659307	0.923	1	1	0.219524	0.658518	ENSG00000111640
ARF1	0.00908507	0.496342	0.923	1	1	0.220221	0.657141	ENSG00000143761
MAPK6	0.00915568	1.11681	1	0.714	1	0.221315	0.654988	ENSG00000069956
SMAD3	0.00941335	1.75192	0.923	0.571	1	0.224065	0.649625	ENSG00000166949
VDAC1	0.00942416	1.41161	0.923	0.429	1	0.224065	0.649625	ENSG00000213585
BLOC1S2	0.00948155	0.954031	0.923	0.714	1	0.224815	0.648175	ENSG00000196072
AEN	0.009523	1.78206	0.923	0.286	1	0.22549	0.646873	ENSG00000181026
RAB7A	0.00960631	0.937855	1	0.857	1	0.227153	0.643681	ENSG00000075785
PMEPA1	0.00975559	2.01859	1	0.286	1	0.229122	0.639933	ENSG00000124225
IGKC	0.0097832	2.89078	0.923	0.429	1	0.229154	0.639873	ENSG00000211592
NAA50	0.00988475	1.25261	1	0.714	1	0.229982	0.638305	ENSG00000121579
AFG3L2	0.00997699	1.30193	0.923	0.286	1	0.230142	0.638003	ENSG00000141385
CX3CL1	0.0101203	1.19601	0.769	0	1	0.230142	0.638003	ENSG00000006210
PTP4A2	0.0101078	0.643962	1	1	1	0.230142	0.638003	ENSG00000184007
RRBP1	0.0101154	1.14229	1	0.857	1	0.230142	0.638003	ENSG00000125844
IFI6	0.0101667	2.25777	1	0.571	1	0.230676	0.636998	ENSG00000126709
CAPZA1	0.010265	0.985654	0.923	1	1	0.231978	0.634554	ENSG00000116489
SLC6A6	0.0103206	1.25004	0.923	0.429	1	0.232623	0.633347	ENSG00000131389
HIF1A	0.0105454	0.911037	1	1	1	0.234673	0.629538	ENSG00000100644
GOLT1B	0.0106303	1.24766	0.923	0.571	1	0.235956	0.627168	ENSG00000111711
SFPQ	0.0109032	0.6021	1	1	1	0.240174	0.619474	ENSG00000116560
FOSL1	0.0109457	1.84419	0.923	0.571	1	0.240205	0.619418	ENSG00000175592
GTPBP4	0.0110087	1.37314	1	0.571	1	0.240971	0.618034	ENSG00000107937
UBE2H	0.0109984	1.5836	1	0.714	1	0.240971	0.618034	ENSG00000186591
KLHL21	0.0110693	1.40059	1	0.429	1	0.241386	0.617288	ENSG00000162413
CAPRIN1	0.0112041	1.59446	1	0.429	1	0.244018	0.612578	ENSG00000135387
SLC20A1	0.0112708	0.670958	0.846	0.857	1	0.244857	0.611087	ENSG00000144136
GATAD2A	0.0113517	0.938912	0.923	0.714	1	0.245083	0.610687	ENSG00000167491
KLF6	0.0113388	0.719978	1	1	1	0.245083	0.610687	ENSG00000067082
S100A10	0.0113484	0.894864	1	1	1	0.245083	0.610687	ENSG00000197747
ZNF462	0.0113516	1.27219	0.846	0.286	1	0.245083	0.610687	ENSG00000148143
NIP7	0.0114663	1.12817	0.923	0.429	1	0.246335	0.608475	ENSG00000132603
HNRNPAB	0.0115012	1.58979	1	0.571	1	0.246474	0.608229	ENSG00000197451
PHLDA2	0.0115624	1.13116	0.846	0.286	1	0.247176	0.606993	ENSG00000274538
PHLDA2	0.0115624	1.13116	0.846	0.286	1	0.247176	0.606993	ENSG00000181649
S100A11	0.0118051	0.916088	1	1	1	0.250822	0.600635	ENSG00000163191
ATP13A2	0.0119443	1.3049	0.846	0.286	1	0.252545	0.597661	ENSG00000159363
UBQLN1	0.0120997	1.20677	1	0.714	1	0.254592	0.594156	ENSG00000135018
FCN3	0.0121713	2.24792	0.615	0.143	1	0.25579	0.592117	ENSG00000142748
CDC42	0.0121894	0.508213	1	1	1	0.25586	0.591997	ENSG00000070831
RLIM	0.0122612	0.428791	0.923	0.857	1	0.256289	0.59127	ENSG00000131263
SPRY2	0.0122468	1.29635	1	0.429	1	0.256289	0.59127	ENSG00000136158
PCDH17	0.0123052	1.29542	1	0.714	1	0.256727	0.590528	ENSG00000118946
PDLIM7	0.0124119	1.12044	0.923	0.714	1	0.256809	0.59039	ENSG00000196923
PPP1R14B	0.0125242	1.39129	1	0.714	1	0.258031	0.588328	ENSG00000173457
SORBS1	0.0125928	1.11877	0.846	0.571	1	0.258654	0.587282	ENSG00000095637
IQCJ-SCHIP1	0.0126815	0.393116	0.923	0.429	1	0.258711	0.587185	ENSG00000283154
EIF1	0.0127772	0.415605	1	1	1	0.259728	0.585482	ENSG00000173812
CDC42BPB	0.0129578	1.03556	0.923	0.857	1	0.261509	0.582513	ENSG00000198752
EIF4A1	0.0129627	0.713606	1	1	1	0.261509	0.582513	ENSG00000161960
SPTBN1	0.0129852	1.13044	1	0.857	1	0.261509	0.582513	ENSG00000115306
ATP1B3	0.0130571	1.1931	0.846	0.571	1	0.26235	0.581119	ENSG00000069849
FADS3	0.0131419	1.15364	0.923	0.571	1	0.262779	0.58041	ENSG00000221968
PLEKHO1	0.0131526	0.869592	0.923	1	1	0.262779	0.58041	ENSG00000023902
MAFK	0.0131821	1.44073	1	0.571	1	0.2628	0.580374	ENSG00000198517
CD63	0.0132207	1.15849	1	1	1	0.263202	0.579711	ENSG00000135404
PDLIM1	0.0132733	0.932219	0.923	1	1	0.263646	0.578978	ENSG00000107438
COL6A1	0.0132907	1.9608	1	0.286	1	0.263691	0.578905	ENSG00000142156
DHX15	0.0134073	0.893065	1	0.857	1	0.264793	0.577093	ENSG00000109606
MTSS1	0.0134693	1.34759	0.923	0.714	1	0.265115	0.576565	ENSG00000170873
GADD45A	0.0135045	0.75915	1	1	1	0.265206	0.576416	ENSG00000116717
PLAUR	0.0134958	1.34921	1	0.429	1	0.265206	0.576416	ENSG00000011422
CRIP2	0.0135232	1.05893	0.923	1	1	0.265274	0.576305	ENSG00000182809
LGALS1	0.0137282	0.948181	1	0.857	1	0.267529	0.572629	ENSG00000100097
SLC12A2	0.0137402	0.857255	0.923	0.857	1	0.267529	0.572629	ENSG00000064651
MAP1S	0.0139217	1.08492	0.923	0.714	1	0.268749	0.570652	ENSG00000130479
CYTH3	0.0140804	1.13745	0.923	0.571	1	0.270704	0.567505	ENSG00000008256
NPM1	0.014103	0.820195	1	1	1	0.27084	0.567287	ENSG00000181163
PIGA	0.0142799	0.404858	0.846	0.714	1	0.272941	0.563931	ENSG00000165195
RNF2	0.0143439	1.19226	0.923	0.286	1	0.273651	0.562803	ENSG00000121481
F2R	0.0144446	0.873044	0.923	1	1	0.27527	0.56024	ENSG00000181104
A4GALT	0.0146766	1.16317	0.846	0.571	1	0.278745	0.554793	ENSG00000128274
EIF3B	0.014783	1.17603	0.923	0.857	1	0.27927	0.553975	ENSG00000106263
FLNA	0.0148753	0.903476	1	0.714	1	0.280479	0.552099	ENSG00000196924
CWC25	0.0150379	0.575236	1	0.857	1	0.282855	0.548436	ENSG00000276761
CWC25	0.0150379	0.575236	1	0.857	1	0.282855	0.548436	ENSG00000273559
ABL2	0.0154575	1.28954	0.923	0.571	1	0.287022	0.542086	ENSG00000143322
MTPN	0.0154406	0.905714	0.923	0.571	1	0.287022	0.542086	ENSG00000105887
VAMP3	0.0155684	0.993302	0.769	0.571	1	0.28785	0.540833	ENSG00000049245
GRK5	0.0156576	1.1525	0.846	0.429	1	0.288759	0.539464	ENSG00000198873
SVIL	0.0156674	1.61367	0.923	0.571	1	0.288759	0.539464	ENSG00000197321
KPNA4	0.0157165	0.983035	1	0.857	1	0.289356	0.538567	ENSG00000186432
SLC35E4	0.0158335	1.05208	0.923	0.714	1	0.290587	0.536723	ENSG00000100036
SYNCRIP	0.0159118	0.708687	0.846	0.714	1	0.291102	0.535954	ENSG00000135316
BTG3	0.0160215	1.30137	1	0.714	1	0.291881	0.534795	ENSG00000154640
BTG3	0.0160215	1.30137	1	0.714	1	0.291881	0.534795	ENSG00000281484
TMEM167B	0.0161756	0.577372	0.846	0.714	1	0.291952	0.534689	ENSG00000215717
TSR1	0.016152	1.12033	0.923	0.571	1	0.291952	0.534689	ENSG00000167721
OPA1	0.0163179	1.48352	0.923	0.571	1	0.29271	0.533563	ENSG00000198836
TIE1	0.0168305	0.714203	0.923	1	1	0.299278	0.523926	ENSG00000066056
MAPK1IP1L	0.0168689	0.967094	0.923	0.857	1	0.29947	0.523647	ENSG00000168175
ILF2	0.0168863	0.377501	1	1	1	0.299473	0.523642	ENSG00000143621
ANKLE2	0.0169649	0.751444	0.923	0.714	1	0.299823	0.523136	ENSG00000176915
EIF1AX	0.0169992	0.782662	1	0.857	1	0.299823	0.523136	ENSG00000173674
PFKP	0.0170095	1.46731	0.769	0.286	1	0.299823	0.523136	ENSG00000067057
AQP1	0.0170918	1.3034	0.769	0.429	1	0.300408	0.522288	ENSG00000240583
TP53BP2	0.0171737	0.389762	0.846	0.857	1	0.300964	0.521485	ENSG00000143514
RNF19B	0.0172136	0.812009	0.846	0.429	1	0.301281	0.521028	ENSG00000116514
HAPLN3	0.0172428	0.880694	0.846	0.571	1	0.301489	0.520728	ENSG00000140511
PLK3	0.0173628	0.748428	0.923	0.857	1	0.303281	0.518155	ENSG00000173846
LRRFIP1	0.017714	0.730498	1	1	1	0.306642	0.513368	ENSG00000124831
ALPK3	0.0177535	1.35125	0.923	0.571	1	0.306804	0.513139	ENSG00000136383
SDCBP2	0.0178167	0.603401	0.846	0.571	1	0.307201	0.512577	ENSG00000125775
SMURF1	0.0184036	1.176	0.923	0.571	1	0.312969	0.504499	ENSG00000198742
WDFY1	0.0185727	1.06593	1	0.714	1	0.314034	0.503023	ENSG00000085449
CDH13	0.0189454	0.808043	0.769	0	1	0.315346	0.501213	ENSG00000140945
FAM210A	0.0188201	0.705924	0.846	0.714	1	0.315346	0.501213	ENSG00000177150
CAPN2	0.0192744	1.35386	0.923	0.857	1	0.317106	0.498796	ENSG00000162909
PTBP3	0.0198096	1.50507	1	0.571	1	0.321467	0.492863	ENSG00000119314
PPP1CB	0.0198915	0.83154	1	1	1	0.322194	0.491882	ENSG00000213639
SAP30BP	0.0199586	0.74909	0.923	0.857	1	0.32238	0.491631	ENSG00000161526
NHSL1	0.0200188	1.029	0.923	0.571	1	0.322453	0.491533	ENSG00000135540
ZC3H15	0.0200148	0.738507	1	0.857	1	0.322453	0.491533	ENSG00000065548
ZNF639	0.0200988	0.580779	0.846	0.714	1	0.322621	0.491308	ENSG00000121864
HSF1	0.0203102	0.907791	1	0.857	1	0.32444	0.488865	ENSG00000284774
HSF1	0.0203102	0.907791	1	0.857	1	0.32444	0.488865	ENSG00000185122
POFUT2	0.0203828	0.729657	1	0.857	1	0.324833	0.48834	ENSG00000186866
PCBP2	0.0204866	0.442159	1	1	1	0.325762	0.4871	ENSG00000197111
TRIAP1	0.0205453	0.711218	0.923	0.571	1	0.326099	0.486651	ENSG00000170855
ENO1	0.0206414	0.653378	1	0.714	1	0.326431	0.486208	ENSG00000074800
TIMM17A	0.0206267	0.88333	0.769	0.571	1	0.326431	0.486208	ENSG00000134375
YWHAG	0.0208646	0.589889	1	0.857	1	0.328765	0.483115	ENSG00000170027
SPTAN1	0.0212178	0.593333	1	1	1	0.331325	0.479746	ENSG00000197694
TACC2	0.0212068	1.27249	0.846	0.429	1	0.331325	0.479746	ENSG00000138162
CLIC1	0.021336	0.702476	1	1	1	0.332574	0.478112	ENSG00000226651
CLIC1	0.021336	0.702476	1	1	1	0.332574	0.478112	ENSG00000230685
CLIC1	0.021336	0.702476	1	1	1	0.332574	0.478112	ENSG00000223639
CLIC1	0.021336	0.702476	1	1	1	0.332574	0.478112	ENSG00000226417
CLIC1	0.021336	0.702476	1	1	1	0.332574	0.478112	ENSG00000226248
CLIC1	0.021336	0.702476	1	1	1	0.332574	0.478112	ENSG00000206394
CLIC1	0.021336	0.702476	1	1	1	0.332574	0.478112	ENSG00000213719
BUD31	0.0217012	0.767868	1	1	1	0.336156	0.473459	ENSG00000106245
GTPBP1	0.0218207	1.57179	1	0.429	1	0.337706	0.471461	ENSG00000100226
ABLIM3	0.0220926	1.49531	0.923	0.714	1	0.3407	0.467628	ENSG00000173210
USP14	0.022124	0.429261	0.923	0.857	1	0.340883	0.467395	ENSG00000101557
ACER3	0.0221659	1.12901	0.923	0.571	1	0.340924	0.467343	ENSG00000078124
PDLIM4	0.0221503	1.87817	0.769	0.286	1	0.340924	0.467343	ENSG00000131435
UBE2D1	0.0222632	0.787006	0.923	0.571	1	0.342117	0.465825	ENSG00000072401
SDC4	0.0223948	1.82041	1	0.286	1	0.343296	0.464331	ENSG00000124145
RALGDS	0.0226144	0.629087	0.923	1	1	0.344668	0.462599	ENSG00000160271
UBE2N	0.0226865	1.1133	1	0.714	1	0.344961	0.46223	ENSG00000177889
DEK	0.0227437	0.603481	1	1	1	0.345228	0.461894	ENSG00000124795
VPS37B	0.0227254	0.926998	1	0.571	1	0.345228	0.461894	ENSG00000139722
ANKRD11	0.0230153	1.06226	1	1	1	0.346897	0.4598	ENSG00000167522
CD93	0.0229626	0.419097	0.923	1	1	0.346897	0.4598	ENSG00000125810
GRB10	0.0230102	1.01938	0.923	0.714	1	0.346897	0.4598	ENSG00000106070
RPRD1B	0.0230935	0.522612	0.923	0.571	1	0.347201	0.459419	ENSG00000101413
BRIX1	0.0231687	1.18536	1	0.571	1	0.347431	0.459132	ENSG00000113460
SH3BP4	0.0232533	1.18444	0.923	0.429	1	0.348098	0.458299	ENSG00000130147
PSMC3	0.0239074	1.01665	1	0.571	1	0.352426	0.452932	ENSG00000165916
TCERG1	0.0239933	1.30157	1	0.571	1	0.353393	0.451743	ENSG00000113649
FKBP1A	0.0246844	0.702065	0.923	1	1	0.358834	0.445107	ENSG00000088832
NCOR2	0.0246649	1.65982	0.923	0.286	1	0.358834	0.445107	ENSG00000196498
SAMHD1	0.024776	0.573969	0.923	0.429	1	0.359738	0.444014	ENSG00000101347
CCNK	0.0248342	0.500302	0.846	0.857	1	0.360217	0.443435	ENSG00000090061
LAPTM5	0.0248504	0.378147	0.923	1	1	0.360217	0.443435	ENSG00000162511
ASPH	0.0250233	1.47305	1	0.714	1	0.361657	0.441703	ENSG00000198363
NAF1	0.0253043	0.567812	0.923	0.429	1	0.362862	0.440259	ENSG00000145414
ARHGAP21	0.0254516	1.31986	1	0.714	1	0.364673	0.438096	ENSG00000107863
SMIM13	0.02557	0.56426	1	0.714	1	0.365575	0.437024	ENSG00000224531
RGCC	0.0256441	0.824888	1	1	1	0.365924	0.436609	ENSG00000102760
ZCCHC8	0.0256692	1.19692	0.846	0.429	1	0.36598	0.436542	ENSG00000033030
PER2	0.0257704	1.45345	1	0.571	1	0.366521	0.435901	ENSG00000132326
NAA15	0.0258956	0.859358	1	0.714	1	0.367101	0.435215	ENSG00000164134
TRIO	0.0263217	1.19865	0.923	0.571	1	0.368926	0.433061	ENSG00000038382
FGFR1	0.0266252	1.36396	1	0.714	1	0.370791	0.430871	ENSG00000077782
STX3	0.026733	1.28291	0.923	0.571	1	0.371993	0.429466	ENSG00000166900
DNAJA2	0.0268155	0.700142	1	0.714	1	0.372139	0.429295	ENSG00000069345
CEBPG	0.0270576	1.16408	0.923	0.857	1	0.373919	0.427222	ENSG00000153879
SCML1	0.0270896	1.14524	1	0.857	1	0.373919	0.427222	ENSG00000047634
PPA1	0.0273455	1.0814	0.923	0.571	1	0.374274	0.42681	ENSG00000180817
ACSL3	0.0274082	1.04235	1	0.857	1	0.374787	0.426216	ENSG00000123983
ZYX	0.0274994	1.2373	1	0.857	1	0.375443	0.425456	ENSG00000285443
ZYX	0.0274994	1.2373	1	0.857	1	0.375443	0.425456	ENSG00000159840
ITGB1	0.0275598	0.992713	1	1	1	0.375973	0.424843	ENSG00000150093
CCT4	0.0276668	0.64862	0.923	1	1	0.376136	0.424655	ENSG00000115484
KLF13	0.0276387	0.829297	0.923	0.714	1	0.376136	0.424655	ENSG00000275746
KLF13	0.0276387	0.829297	0.923	0.714	1	0.376136	0.424655	ENSG00000169926
LAMA5	0.0282886	1.98185	0.923	0.286	1	0.380596	0.419536	ENSG00000130702
MYL6	0.0282648	0.551588	1	1	1	0.380596	0.419536	ENSG00000092841
RRN3	0.0283398	1.12976	1	0.571	1	0.380932	0.419152	ENSG00000278494
RRN3	0.0283398	1.12976	1	0.571	1	0.380932	0.419152	ENSG00000085721
RTN4	0.0284747	0.398139	1	1	1	0.380978	0.4191	ENSG00000115310
TLE1	0.0286924	1.10107	0.923	0.286	1	0.381929	0.418017	ENSG00000196781
HGS	0.0287297	1.05115	0.923	0.714	1	0.382037	0.417895	ENSG00000185359
HIPK1	0.0288939	0.719196	1	0.857	1	0.383568	0.416158	ENSG00000163349
SPRY4	0.0291256	0.63593	0.923	0.857	1	0.384247	0.415389	ENSG00000187678
CHMP2B	0.0293079	1.09359	0.923	0.429	1	0.384431	0.415182	ENSG00000083937
THBD	0.0294632	0.828378	0.923	1	1	0.385886	0.413541	ENSG00000178726
GOLIM4	0.0295238	1.36833	1	0.571	1	0.386284	0.413094	ENSG00000173905
GALNT1	0.0295617	0.585942	1	1	1	0.386302	0.413073	ENSG00000141429
TLE3	0.0296581	1.01678	0.923	0.714	1	0.38698	0.412312	ENSG00000140332
DNAJC1	0.0298002	1.24282	0.923	0.714	1	0.38796	0.411213	ENSG00000136770
SRPK1	0.0298987	1.05631	0.923	0.429	1	0.388526	0.410579	ENSG00000096063
PTBP1	0.0307896	0.798103	1	1	1	0.395301	0.403072	ENSG00000011304
GNG5	0.0308771	0.842563	1	0.857	1	0.395463	0.402894	ENSG00000174021
EIF5A	0.0311468	0.79264	0.923	1	1	0.396216	0.402068	ENSG00000288145
EIF5A	0.0311468	0.79264	0.923	1	1	0.396216	0.402068	ENSG00000132507
MAPKAPK2	0.0310516	0.72805	0.923	0.857	1	0.396216	0.402068	ENSG00000162889
SRP72	0.0310894	1.29332	1	0.571	1	0.396216	0.402068	ENSG00000174780
MSX1	0.0316494	0.87628	0.846	0.429	1	0.40034	0.397571	ENSG00000163132
SGTA	0.0318514	1.17782	1	0.429	1	0.402017	0.395756	ENSG00000104969
PREX1	0.0318779	0.683267	0.923	0.571	1	0.402059	0.39571	ENSG00000124126
RAN	0.0320528	0.806732	0.923	0.857	1	0.402492	0.395242	ENSG00000132341
WDR43	0.032274	1.41419	0.923	0.571	1	0.403251	0.394425	ENSG00000163811
SLC25A6	0.0323116	0.765355	1	1	1	0.403431	0.39423	ENSG00000292334
SLC25A6	0.0323116	0.765355	1	1	1	0.403431	0.39423	ENSG00000169100
RAB5C	0.0323608	0.556814	1	0.857	1	0.403686	0.393956	ENSG00000108774
PFKFB3	0.0325496	0.280558	0.923	0.714	1	0.405238	0.39229	ENSG00000170525
CYTH1	0.0325762	0.875698	0.923	0.857	1	0.405279	0.392246	ENSG00000108669
PRPF40A	0.0326359	0.815198	1	1	1	0.405441	0.392072	ENSG00000196504
GNL1	0.0326885	0.679021	0.923	0.714	1	0.405678	0.391818	ENSG00000206412
GNL1	0.0326885	0.679021	0.923	0.714	1	0.405678	0.391818	ENSG00000226882
GNL1	0.0326885	0.679021	0.923	0.714	1	0.405678	0.391818	ENSG00000235986
GNL1	0.0326885	0.679021	0.923	0.714	1	0.405678	0.391818	ENSG00000229470
GNL1	0.0326885	0.679021	0.923	0.714	1	0.405678	0.391818	ENSG00000232143
GNL1	0.0326885	0.679021	0.923	0.714	1	0.405678	0.391818	ENSG00000228581
GNL1	0.0326885	0.679021	0.923	0.714	1	0.405678	0.391818	ENSG00000204590
GNL1	0.0326885	0.679021	0.923	0.714	1	0.405678	0.391818	ENSG00000206492
HMGA1	0.0331127	1.81356	0.923	0.429	1	0.408779	0.388512	ENSG00000137309
RNF24	0.0332685	0.850992	0.692	0.143	1	0.409495	0.387751	ENSG00000101236
NOP58	0.0333616	0.70305	0.923	0.714	1	0.41006	0.387152	ENSG00000055044
MEF2A	0.033536	0.852052	0.923	1	1	0.410647	0.386532	ENSG00000068305
PSMD1	0.0337444	1.21361	1	0.714	1	0.410647	0.386532	ENSG00000173692
RAB18	0.0337666	0.480455	0.923	0.857	1	0.410647	0.386532	ENSG00000099246
SOX4	0.0335762	0.940645	1	1	1	0.410647	0.386532	ENSG00000124766
PSMB7	0.0339276	1.23539	0.846	0.429	1	0.411488	0.385643	ENSG00000136930
MTMR10	0.0339661	1.02368	0.923	0.571	1	0.411668	0.385453	ENSG00000277086
MTMR10	0.0339661	1.02368	0.923	0.571	1	0.411668	0.385453	ENSG00000166912
OGT	0.0341058	1.05713	0.923	0.857	1	0.412007	0.385096	ENSG00000147162
METTL1	0.0341764	0.73118	0.846	0.143	1	0.412204	0.384888	ENSG00000037897
EIF5	0.034282	0.520792	1	1	1	0.412918	0.384136	ENSG00000100664
CRY2	0.0344815	0.692101	1	0.857	1	0.41502	0.381931	ENSG00000121671
NRAS	0.0345775	1.19393	0.846	0.429	1	0.415481	0.381449	ENSG00000213281
COPRS	0.0347663	1.32683	1	0.714	1	0.416281	0.380614	ENSG00000172301
STX1A	0.0348534	1.46595	0.846	0.286	1	0.416281	0.380614	ENSG00000106089
XRN2	0.0348297	0.622256	1	0.857	1	0.416281	0.380614	ENSG00000088930
COPS3	0.0349717	0.747074	0.923	0.714	1	0.416307	0.380586	ENSG00000141030
MOK	0.0351566	0.696621	0.923	0.714	1	0.417365	0.379484	ENSG00000080823
CYTH2	0.035264	0.816136	1	0.857	1	0.418354	0.378457	ENSG00000105443
PHLDB1	0.0354971	1.244	0.846	0.286	1	0.419687	0.377075	ENSG00000019144
SHOC2	0.0354944	0.753194	1	0.857	1	0.419687	0.377075	ENSG00000108061
ARHGDIA	0.0361074	0.745475	0.923	1	1	0.424018	0.372616	ENSG00000141522
NFIL3	0.0361519	1.17682	1	0.714	1	0.424254	0.372374	ENSG00000165030
RFX2	0.0362197	0.473949	1	0.714	1	0.424763	0.371854	ENSG00000087903
IRAK1	0.0368169	1.45168	0.846	0.286	1	0.427154	0.369415	ENSG00000184216
CAV2	0.0372575	1.15283	1	0.857	1	0.428013	0.368543	ENSG00000105971
RHEB	0.0371422	0.596686	1	1	1	0.428013	0.368543	ENSG00000106615
TMSB4X	0.0370989	0.411454	1	1	1	0.428013	0.368543	ENSG00000205542
TRAF3	0.0372584	1.08074	0.692	0.143	1	0.428013	0.368543	ENSG00000131323
CFL2	0.0373762	1.30048	0.923	0.429	1	0.428212	0.368341	ENSG00000165410
HNRNPH3	0.0374615	0.514879	1	1	1	0.42845	0.368099	ENSG00000096746
GSTO1	0.0376845	1.23379	1	0.571	1	0.430044	0.366487	ENSG00000148834
CELF1	0.0380232	1.05256	0.923	0.857	1	0.431907	0.36461	ENSG00000149187
CCDC59	0.0382008	0.5036	1	1	1	0.432927	0.363585	ENSG00000133773
RBM3	0.0382106	0.583377	1	1	1	0.432927	0.363585	ENSG00000102317
KITLG	0.0386718	1.37503	0.923	0.429	1	0.43585	0.360663	ENSG00000049130
BTBD1	0.0390394	0.71555	0.923	0.429	1	0.43829	0.358238	ENSG00000064726
DUSP8	0.0392236	1.22804	0.692	0.286	1	0.43829	0.358238	ENSG00000291431
DUSP8	0.0392236	1.22804	0.692	0.286	1	0.43829	0.358238	ENSG00000273793
DUSP8	0.0392236	1.22804	0.692	0.286	1	0.43829	0.358238	ENSG00000278165
DUSP8	0.0392236	1.22804	0.692	0.286	1	0.43829	0.358238	ENSG00000184545
FOXO1	0.0391496	0.835852	1	1	1	0.43829	0.358238	ENSG00000150907
GSN	0.0392393	1.22892	1	0.857	1	0.43829	0.358238	ENSG00000148180
KIF1B	0.0390559	1.26431	1	0.714	1	0.43829	0.358238	ENSG00000054523
SHB	0.0390361	0.557611	0.923	0.714	1	0.43829	0.358238	ENSG00000107338
DENND5A	0.0392776	0.658955	1	0.714	1	0.438436	0.358094	ENSG00000184014
CSPP1	0.0394491	0.578619	1	0.714	1	0.43866	0.357872	ENSG00000104218
MAP2K3	0.0394097	0.487999	1	1	1	0.43866	0.357872	ENSG00000034152
NONO	0.0394168	0.817423	0.923	0.714	1	0.43866	0.357872	ENSG00000147140
CCT2	0.0396498	0.541533	0.923	1	1	0.439486	0.357055	ENSG00000166226
REC8	0.0398043	0.916485	0.923	0.429	1	0.440917	0.355644	ENSG00000285007
REC8	0.0398043	0.916485	0.923	0.429	1	0.440917	0.355644	ENSG00000100918
CDC42EP2	0.0399234	0.843862	0.846	0.857	1	0.441955	0.354622	ENSG00000149798
ARFGEF2	0.0404414	0.91901	0.846	0.429	1	0.444752	0.351882	ENSG00000124198
PHC2	0.0404142	1.0706	1	0.857	1	0.444752	0.351882	ENSG00000134686
RAB36	0.0404576	0.265191	0.769	0.143	1	0.444752	0.351882	ENSG00000100228
C9orf72	0.040588	1.60922	0.923	0.429	1	0.445341	0.351308	ENSG00000147894
EMC8	0.0407291	0.566427	1	0.714	1	0.445883	0.350779	ENSG00000131148
TFAM	0.0410473	1.18846	1	0.429	1	0.447231	0.349468	ENSG00000108064
FN1	0.04201	2.32127	0.846	0.143	1	0.451245	0.345588	ENSG00000115414
MOB3A	0.0420363	0.612582	0.769	0.571	1	0.451245	0.345588	ENSG00000172081
RASGEF1B	0.0419294	1.00913	1	0.714	1	0.451245	0.345588	ENSG00000138670
SRGAP1	0.0418536	1.32439	1	0.714	1	0.451245	0.345588	ENSG00000196935
TRIM47	0.0422444	1.43133	0.923	0.429	1	0.452087	0.344778	ENSG00000132481
SH2B3	0.0425568	1.22913	0.923	0.429	1	0.454323	0.342636	ENSG00000111252
IDH3A	0.0429869	1.49849	1	0.286	1	0.457229	0.339866	ENSG00000166411
NFATC1	0.0431438	0.71373	0.846	0.429	1	0.458618	0.338549	ENSG00000131196
CFAP69	0.0435323	1.3491	0.769	0.286	1	0.460847	0.336443	ENSG00000105792
DNAJC2	0.0438488	0.532875	0.923	0.714	1	0.462997	0.334422	ENSG00000105821
MTCH1	0.0441424	0.796057	1	0.857	1	0.46467	0.332855	ENSG00000137409
PLEC	0.0442455	0.931836	0.923	0.857	1	0.46467	0.332855	ENSG00000178209
PPP2R3C	0.0440657	0.460913	0.923	0.857	1	0.46467	0.332855	ENSG00000092020
TNS1	0.0447637	1.12285	0.923	0.571	1	0.468106	0.329656	ENSG00000079308
BRI3	0.0449403	0.49414	1	1	1	0.469107	0.328728	ENSG00000164713
PNO1	0.0452619	1.0703	0.846	0.429	1	0.470472	0.327466	ENSG00000115946
USP36	0.0455313	1.1796	1	0.571	1	0.470472	0.327466	ENSG00000055483
TM9SF3	0.0455929	0.432818	1	1	1	0.470641	0.32731	ENSG00000077147
ZNF385A	0.0456018	0.243535	0.846	0.429	1	0.470641	0.32731	ENSG00000161642
MIER2	0.0457125	1.12139	0.923	0.714	1	0.470684	0.327271	ENSG00000105556
PLVAP	0.0457664	0.75152	1	1	1	0.470684	0.327271	ENSG00000130300
SSB	0.0457333	0.370904	0.923	1	1	0.470684	0.327271	ENSG00000138385
JAG1	0.0461794	1.00513	0.923	0.571	1	0.472217	0.325859	ENSG00000101384
SMG5	0.0460802	0.853555	0.846	0.429	1	0.472217	0.325859	ENSG00000198952
ZFAND3	0.0462852	1.334	1	0.571	1	0.472364	0.325723	ENSG00000156639
DECR2	0.0468794	0.961845	0.923	0	1	0.476119	0.322285	ENSG00000274296
DECR2	0.0468794	0.961845	0.923	0	1	0.476119	0.322285	ENSG00000242612
PBDC1	0.0469905	0.266136	0.846	0.714	1	0.476207	0.322204	ENSG00000102390
ANKRD28	0.0476376	0.328228	0.923	1	1	0.479383	0.319317	ENSG00000206560
ATP6V0D1	0.0481544	0.893861	0.923	0.714	1	0.479383	0.319317	ENSG00000159720
CCDC12	0.0483245	0.50704	0.923	0.714	1	0.479383	0.319317	ENSG00000160799
DBN1	0.0483197	0.801515	0.923	0.571	1	0.479383	0.319317	ENSG00000113758
GPAT4	0.0482992	0.628259	0.923	0.571	1	0.479383	0.319317	ENSG00000158669
JAK1	0.048046	0.90408	0.923	1	1	0.479383	0.319317	ENSG00000162434
MBIP	0.0482161	0.180593	0.846	0.429	1	0.479383	0.319317	ENSG00000151332
NPC1	0.0482105	1.08542	0.923	0.571	1	0.479383	0.319317	ENSG00000141458
SOX17	0.0480779	1.32058	0.923	0.429	1	0.479383	0.319317	ENSG00000164736
VWA1	0.0478646	1.54519	0.846	0.286	1	0.479383	0.319317	ENSG00000179403
USP7	0.0486771	0.713297	1	0.714	1	0.481332	0.317555	ENSG00000187555
ZNF414	0.0486667	0.776365	0.769	0.286	1	0.481332	0.317555	ENSG00000133250
HK2	0.0488525	1.35554	0.846	0.286	1	0.482549	0.316459	ENSG00000159399
DRAP1	0.049854	0.949338	0.923	0.857	1	0.487418	0.312099	ENSG00000175550
FNIP2	0.0498238	0.561887	0.923	0.714	1	0.487418	0.312099	ENSG00000052795
TINAGL1	0.0498468	0.826568	1	1	1	0.487418	0.312099	ENSG00000142910
RAB22A	0.050125	0.460945	0.846	0.714	1	0.488326	0.311291	ENSG00000124209
NFKBIB	0.0502751	0.546472	0.923	0.571	1	0.489239	0.310479	ENSG00000282905
NFKBIB	0.0502751	0.546472	0.923	0.571	1	0.489239	0.310479	ENSG00000104825
DOT1L	0.0503995	0.783043	0.923	0.857	1	0.489664	0.310102	ENSG00000104885
PITPNB	0.0506373	0.573637	1	1	1	0.490624	0.309251	ENSG00000180957
MET	0.0508718	1.41001	0.923	0.143	1	0.491195	0.308746	ENSG00000105976
BZW2	0.0519784	0.872841	0.923	0.429	1	0.49639	0.304177	ENSG00000136261
PCM1	0.051981	0.53417	1	1	1	0.49639	0.304177	ENSG00000078674
POLR1C	0.0518867	0.914915	0.923	0.714	1	0.49639	0.304177	ENSG00000171453
RRAGC	0.0519009	1.26537	0.846	0.429	1	0.49639	0.304177	ENSG00000116954
SLC30A1	0.0527092	1.00268	0.846	0.429	1	0.500594	0.300515	ENSG00000170385
ARF6	0.0529062	0.73541	1	0.857	1	0.501368	0.299843	ENSG00000165527
DDA1	0.0532697	1.09105	1	0.714	1	0.502635	0.298747	ENSG00000130311
UTP4	0.0536987	1.18691	0.923	0.286	1	0.50557	0.296218	ENSG00000141076
UTP4	0.0536987	1.18691	0.923	0.286	1	0.50557	0.296218	ENSG00000262788
NFKB1	0.0540082	0.301677	0.923	0.857	1	0.50748	0.294581	ENSG00000109320
CDC27	0.0542836	0.576699	0.923	0.714	1	0.508966	0.293311	ENSG00000004897
TOMM5	0.0544851	0.747948	0.923	0.857	1	0.509295	0.293031	ENSG00000175768
ANKDD1A	0.0548956	1.09241	0.923	0.714	1	0.510146	0.292305	ENSG00000166839
COPS8	0.0548947	0.638975	1	0.714	1	0.510146	0.292305	ENSG00000198612
TSHZ1	0.0554882	1.42266	0.846	0.429	1	0.512886	0.289979	ENSG00000179981
LRRC8C	0.0556295	1.47534	0.923	0.429	1	0.513185	0.289726	ENSG00000171488
ARHGAP27	0.0561227	1.09849	0.923	0.571	1	0.514203	0.288866	ENSG00000276907
ARHGAP27	0.0561227	1.09849	0.923	0.571	1	0.514203	0.288866	ENSG00000276836
ARHGAP27	0.0561227	1.09849	0.923	0.571	1	0.514203	0.288866	ENSG00000159314
PRRC2C	0.0561836	0.619863	1	1	1	0.514203	0.288866	ENSG00000117523
ULK4	0.056053	0.844688	0.923	0.857	1	0.514203	0.288866	ENSG00000168038
AKAP8	0.0563007	0.478767	0.846	0.857	1	0.514461	0.288647	ENSG00000105127
MED10	0.0567964	0.36853	1	1	1	0.515738	0.287571	ENSG00000291745
MED10	0.0567964	0.36853	1	1	1	0.515738	0.287571	ENSG00000133398
PDXDC1	0.0566896	1.19384	0.923	0.429	1	0.515738	0.287571	ENSG00000275498
PDXDC1	0.0566896	1.19384	0.923	0.429	1	0.515738	0.287571	ENSG00000179889
SF3B2	0.0566832	0.489172	1	0.857	1	0.515738	0.287571	ENSG00000087365
PRKD3	0.0573424	0.812821	1	0.714	1	0.519339	0.284549	ENSG00000115825
KHDRBS1	0.0574942	0.932196	1	0.857	1	0.519923	0.284061	ENSG00000121774
RFFL	0.0575865	1.15591	0.923	0.286	1	0.519923	0.284061	ENSG00000092871
ATP6V1B2	0.0577302	0.842576	0.846	0.714	1	0.52068	0.283429	ENSG00000147416
ISG15	0.058311	1.39679	1	0.714	1	0.523597	0.281003	ENSG00000187608
LAMA4	0.0585239	0.88061	1	1	1	0.524572	0.280195	ENSG00000112769
EMG1	0.0585982	0.519619	0.846	0.429	1	0.524697	0.280092	ENSG00000126749
EIF3M	0.0586584	0.471389	0.923	0.857	1	0.524966	0.279869	ENSG00000149100
PTPN11	0.0588498	1.19017	0.923	0.571	1	0.525475	0.279448	ENSG00000179295
PDE8A	0.0592313	0.982997	0.923	0.571	1	0.525967	0.279042	ENSG00000073417
THY1	0.0592362	2.15903	0.615	0.286	1	0.525967	0.279042	ENSG00000154096
UBN1	0.0592318	1.24685	0.923	0.571	1	0.525967	0.279042	ENSG00000118900
SAR1A	0.0598816	0.92235	1	0.714	1	0.528295	0.277123	ENSG00000079332
EIF1B	0.0603701	0.301155	1	1	1	0.529173	0.276402	ENSG00000114784
HSPA5	0.0601743	0.729686	1	1	1	0.529173	0.276402	ENSG00000044574
JARID2	0.060158	0.620249	0.846	0.714	1	0.529173	0.276402	ENSG00000008083
TICAM1	0.0603021	0.922706	0.769	0.286	1	0.529173	0.276402	ENSG00000127666
ITPR3	0.0604139	1.13296	0.923	0.571	1	0.52923	0.276355	ENSG00000096433
ABCF1	0.0605859	1.12587	1	0.714	1	0.529669	0.275995	ENSG00000204574
ABCF1	0.0605859	1.12587	1	0.714	1	0.529669	0.275995	ENSG00000225989
ABCF1	0.0605859	1.12587	1	0.714	1	0.529669	0.275995	ENSG00000236149
ABCF1	0.0605859	1.12587	1	0.714	1	0.529669	0.275995	ENSG00000236342
ABCF1	0.0605859	1.12587	1	0.714	1	0.529669	0.275995	ENSG00000231129
ABCF1	0.0605859	1.12587	1	0.714	1	0.529669	0.275995	ENSG00000232169
ABCF1	0.0605859	1.12587	1	0.714	1	0.529669	0.275995	ENSG00000206490
DUSP14	0.0605739	1.08735	0.846	0.429	1	0.529669	0.275995	ENSG00000276023
DUSP14	0.0605739	1.08735	0.846	0.429	1	0.529669	0.275995	ENSG00000275932
PALMD	0.0607523	0.796941	1	1	1	0.530374	0.275418	ENSG00000099260
FBL	0.0608789	0.613101	0.846	0.571	1	0.53063	0.275209	ENSG00000280548
FBL	0.0608789	0.613101	0.846	0.571	1	0.53063	0.275209	ENSG00000105202
ZNF503	0.0608692	1.84438	0.846	0.714	1	0.53063	0.275209	ENSG00000165655
WAC	0.0610496	0.841504	1	1	1	0.531052	0.274863	ENSG00000095787
PTPRE	0.0614915	0.726997	0.923	1	1	0.532378	0.27378	ENSG00000132334
TRIB1	0.0614333	0.762097	1	0.571	1	0.532378	0.27378	ENSG00000173334
COL6A2	0.0619748	1.75707	1	0.571	1	0.534022	0.272441	ENSG00000142173
PDZD8	0.0619483	1.68128	1	0.286	1	0.534022	0.272441	ENSG00000165650
BRMS1L	0.0627698	0.99868	0.846	0.143	1	0.536616	0.270337	ENSG00000100916
NKX3-1	0.0630218	0.301249	0.923	0.429	1	0.537184	0.269877	ENSG00000167034
ATP2B4	0.0637993	0.831485	0.846	0.429	1	0.53985	0.267727	ENSG00000058668
THRAP3	0.0639885	0.879604	1	0.857	1	0.540643	0.26709	ENSG00000054118
ZNFX1	0.0639278	0.880683	0.923	0.571	1	0.540643	0.26709	ENSG00000124201
PI4K2A	0.0648062	0.718508	0.692	0.286	1	0.544911	0.263674	ENSG00000155252
PSMB1	0.0648049	0.223775	0.923	1	1	0.544911	0.263674	ENSG00000008018
PSMB1	0.0648049	0.223775	0.923	1	1	0.544911	0.263674	ENSG00000281184
IFFO2	0.0652544	0.397217	0.846	0.429	1	0.546564	0.262359	ENSG00000169991
SPARC	0.0654171	0.657861	1	0.857	1	0.5468	0.262172	ENSG00000113140
IGFBP5	0.0655703	1.41729	1	0.429	1	0.546839	0.262141	ENSG00000115461
RHBDF1	0.0657462	1.39909	0.846	0.286	1	0.54778	0.261394	ENSG00000007384
HMGN1	0.0658631	0.683827	1	1	1	0.547966	0.261246	ENSG00000205581
SETD1A	0.0658567	0.620244	0.846	0.714	1	0.547966	0.261246	ENSG00000099381
WIPF2	0.0664073	0.449346	1	0.857	1	0.551438	0.258503	ENSG00000171475
ABCE1	0.0672035	1.06199	0.923	0.571	1	0.552852	0.257391	ENSG00000164163
RASA3	0.0670339	0.866886	0.923	0.429	1	0.552852	0.257391	ENSG00000280477
RASA3	0.0670339	0.866886	0.923	0.429	1	0.552852	0.257391	ENSG00000185989
CDYL2	0.0676918	1.18466	0.923	0.286	1	0.553258	0.257073	ENSG00000166446
INHBB	0.0678506	1.2717	0.923	0.571	1	0.553258	0.257073	ENSG00000163083
NDUFA6	0.0678573	0.806337	1	0.714	1	0.553258	0.257073	ENSG00000272765
NDUFA6	0.0678573	0.806337	1	0.714	1	0.553258	0.257073	ENSG00000277365
NDUFA6	0.0678573	0.806337	1	0.714	1	0.553258	0.257073	ENSG00000281013
NDUFA6	0.0678573	0.806337	1	0.714	1	0.553258	0.257073	ENSG00000273397
NDUFA6	0.0678573	0.806337	1	0.714	1	0.553258	0.257073	ENSG00000184983
UBE2E2	0.0676677	0.786071	0.923	0.429	1	0.553258	0.257073	ENSG00000182247
C15orf39	0.0679938	0.666862	0.923	0.571	1	0.553352	0.256999	ENSG00000167173
CDC42EP3	0.067933	0.672575	0.923	0.857	1	0.553352	0.256999	ENSG00000163171
KMT5A	0.0681342	1.38464	0.923	0.429	1	0.553352	0.256999	ENSG00000183955
MAPK7	0.0680858	0.166842	0.923	0.857	1	0.553352	0.256999	ENSG00000166484
DDI2	0.0682836	0.15651	0.923	0.857	1	0.55341	0.256953	ENSG00000197312
DLST	0.068276	0.664951	1	0.857	1	0.55341	0.256953	ENSG00000119689
RIPK2	0.0683642	0.798955	0.846	0.286	1	0.55341	0.256953	ENSG00000104312
NXT1	0.0684392	0.129168	0.923	1	1	0.553463	0.256911	ENSG00000132661
PSMD9	0.0684046	0.776233	0.846	0.286	1	0.553463	0.256911	ENSG00000110801
FNDC3B	0.068741	0.796834	1	0.714	1	0.554909	0.255778	ENSG00000075420
SZRD1	0.0694159	0.442534	1	0.857	1	0.558282	0.253146	ENSG00000291379
SZRD1	0.0694159	0.442534	1	0.857	1	0.558282	0.253146	ENSG00000055070
BAG3	0.069966	0.58118	0.923	0.714	1	0.560643	0.251314	ENSG00000151929
TSC22D2	0.0703833	0.924881	1	0.714	1	0.562937	0.249541	ENSG00000196428
MXD1	0.0708496	0.432516	0.692	0.429	1	0.565106	0.24787	ENSG00000059728
PSMD7	0.0714377	0.513461	1	1	1	0.566794	0.246575	ENSG00000103035
SPIRE1	0.0715502	0.969895	0.846	0.571	1	0.566794	0.246575	ENSG00000134278
TXNRD1	0.0715504	0.739163	0.846	0.571	1	0.566794	0.246575	ENSG00000198431
BCCIP	0.0717005	0.569967	0.923	0.714	1	0.567208	0.246258	ENSG00000107949
SH3GL1	0.0718928	0.795857	0.923	0.714	1	0.567695	0.245885	ENSG00000141985
STX12	0.0721322	0.867011	1	0.714	1	0.568019	0.245637	ENSG00000117758
SOAT1	0.0723363	0.516794	0.846	0.714	1	0.568578	0.24521	ENSG00000057252
USP16	0.0727557	0.55953	1	1	1	0.569592	0.244436	ENSG00000291527
USP16	0.0727557	0.55953	1	1	1	0.569592	0.244436	ENSG00000156256
RAB8B	0.0731747	0.833573	1	1	1	0.572099	0.242529	ENSG00000166128
HNRNPD	0.0735693	0.566293	1	0.857	1	0.574154	0.240972	ENSG00000138668
SNIP1	0.0739557	0.949568	0.923	0.429	1	0.575047	0.240297	ENSG00000163877
TMED5	0.074366	1.02011	1	0.714	1	0.577258	0.23863	ENSG00000117500
KPNA1	0.0744235	1.16319	1	0.714	1	0.577446	0.238488	ENSG00000114030
PDGFB	0.0748298	0.916698	0.846	0.571	1	0.579564	0.236898	ENSG00000100311
BCL2L11	0.0754342	0.932611	0.923	0.571	1	0.580999	0.235825	ENSG00000153094
CHMP4B	0.0754336	0.52457	1	1	1	0.580999	0.235825	ENSG00000101421
GRWD1	0.0755499	0.2683	0.846	0.714	1	0.580999	0.235825	ENSG00000105447
RAP2B	0.0754662	0.657896	0.923	0.857	1	0.580999	0.235825	ENSG00000181467
TSSC4	0.0756283	0.404336	0.923	0.857	1	0.581088	0.235758	ENSG00000184281
FBXO11	0.075767	1.08435	1	0.714	1	0.581499	0.235451	ENSG00000138081
PPRC1	0.0758826	0.724922	1	0.571	1	0.581499	0.235451	ENSG00000148840
RUNX1	0.0765741	2.21475	0.769	0.429	1	0.582952	0.234367	ENSG00000159216
ELL2	0.0766704	0.924801	1	0.714	1	0.583398	0.234035	ENSG00000118985
STX11	0.0768321	0.0337049	0.923	0.714	1	0.583628	0.233864	ENSG00000135604
SCAF4	0.0769244	0.416824	0.923	0.714	1	0.584074	0.233532	ENSG00000156304
KIF5B	0.0772404	0.388095	0.923	0.857	1	0.585706	0.23232	ENSG00000170759
KDM2B	0.0774163	0.783427	0.923	0.571	1	0.586528	0.231711	ENSG00000089094
PSMC4	0.0774806	0.908446	1	0.714	1	0.586759	0.23154	ENSG00000281221
PSMC4	0.0774806	0.908446	1	0.714	1	0.586759	0.23154	ENSG00000013275
CARHSP1	0.0776452	0.611378	1	1	1	0.586946	0.231402	ENSG00000153048
CAB39	0.0781812	0.891759	1	0.714	1	0.587908	0.230691	ENSG00000135932
EIF3I	0.0782946	0.16082	0.923	1	1	0.588309	0.230394	ENSG00000084623
USP47	0.0784181	0.518626	0.923	0.714	1	0.588729	0.230085	ENSG00000170242
NRIP3	0.078612	1.05174	0.769	0.143	1	0.589822	0.229279	ENSG00000175352
ETF1	0.078888	0.769203	1	1	1	0.590231	0.228978	ENSG00000120705
KIAA0232	0.0789571	0.808917	1	0.714	1	0.590231	0.228978	ENSG00000170871
SMIM10L1	0.0789579	1.21125	0.923	0.571	1	0.590231	0.228978	ENSG00000262986
SMIM10L1	0.0789579	1.21125	0.923	0.571	1	0.590231	0.228978	ENSG00000281930
SMIM10L1	0.0789579	1.21125	0.923	0.571	1	0.590231	0.228978	ENSG00000256537
SASH1	0.0791929	0.805782	0.923	0.857	1	0.590477	0.228797	ENSG00000111961
DUSP5	0.0799917	0.614668	1	1	1	0.594573	0.225795	ENSG00000138166
GFOD1	0.0801076	0.853358	0.846	0.571	1	0.594573	0.225795	ENSG00000145990
GUCD1	0.0799227	1.36538	1	0.286	1	0.594573	0.225795	ENSG00000138867
EEF2	0.0804239	0.382699	1	1	1	0.594932	0.225532	ENSG00000167658
NCOA1	0.0802528	0.497406	0.923	0.714	1	0.594932	0.225532	ENSG00000084676
COG3	0.0806512	1.00291	0.923	0.714	1	0.595805	0.224896	ENSG00000136152
FBXO31	0.0818157	0.900681	0.923	0.286	1	0.599388	0.222292	ENSG00000103264
RASSF3	0.0817923	0.480999	0.923	0.571	1	0.599388	0.222292	ENSG00000153179
SIK3	0.081631	0.460732	1	0.857	1	0.599388	0.222292	ENSG00000160584
TXNL1	0.0818381	0.127979	1	1	1	0.599388	0.222292	ENSG00000091164
PDP1	0.0819056	0.696248	0.846	0.143	1	0.599575	0.222156	ENSG00000164951
LRRC59	0.082031	0.520416	0.923	0.714	1	0.599688	0.222075	ENSG00000108829
ARPC2	0.0822947	0.671887	1	1	1	0.59995	0.221885	ENSG00000163466
XPNPEP1	0.0823793	0.912783	0.923	0.571	1	0.600315	0.221621	ENSG00000108039
FAM107A	0.0824914	0.988954	0.769	0.571	1	0.600664	0.221369	ENSG00000168309
TAF13	0.0824962	0.336443	0.846	0.571	1	0.600664	0.221369	ENSG00000197780
LDHA	0.0827853	0.51252	0.923	1	1	0.60176	0.220577	ENSG00000288299
LDHA	0.0827853	0.51252	0.923	1	1	0.60176	0.220577	ENSG00000134333
ACTR3	0.083011	0.242518	1	1	1	0.602217	0.220247	ENSG00000115091
CCDC50	0.0830443	0.693156	0.923	1	1	0.602217	0.220247	ENSG00000152492
MN1	0.0833887	1.16904	0.846	0.143	1	0.60337	0.219416	ENSG00000169184
MAPRE1	0.0834387	1.36539	0.846	0.429	1	0.603454	0.219356	ENSG00000101367
HEBP2	0.0837404	0.546182	1	0.714	1	0.604657	0.218491	ENSG00000051620
RANBP2	0.0842027	0.78463	0.923	0.857	1	0.606461	0.217197	ENSG00000153201
COL4A2	0.084758	0.623145	1	1	1	0.607911	0.21616	ENSG00000134871
HNRNPDL	0.0848104	0.397609	1	1	1	0.607911	0.21616	ENSG00000152795
SMG1	0.0849726	0.682445	1	0.714	1	0.60805	0.216061	ENSG00000157106
STAU1	0.0853013	1.46875	1	0.429	1	0.609345	0.215137	ENSG00000124214
ACTN4	0.0853612	0.680885	1	1	1	0.609522	0.21501	ENSG00000282844
ACTN4	0.0853612	0.680885	1	1	1	0.609522	0.21501	ENSG00000130402
PLOD2	0.0854387	1.43313	1	0.571	1	0.609825	0.214795	ENSG00000152952
B4GALT5	0.0855621	0.829164	0.846	0.571	1	0.610432	0.214363	ENSG00000158470
RAB9A	0.0863754	0.0500235	0.769	0.571	1	0.612721	0.212737	ENSG00000123595
HMOX2	0.0867999	1.34687	0.923	0.429	1	0.613053	0.212502	ENSG00000277424
HMOX2	0.0867999	1.34687	0.923	0.429	1	0.613053	0.212502	ENSG00000103415
LPGAT1	0.086619	1.12925	0.923	0.714	1	0.613053	0.212502	ENSG00000123684
NAA30	0.0868462	1.36184	1	0.286	1	0.613053	0.212502	ENSG00000139977
SLC4A7	0.0866483	0.986714	1	0.714	1	0.613053	0.212502	ENSG00000033867
MBNL2	0.087275	0.493865	0.923	1	1	0.613939	0.211875	ENSG00000139793
ORAI1	0.0880851	0.725711	0.923	0.571	1	0.616559	0.210026	ENSG00000293604
ORAI1	0.0880851	0.725711	0.923	0.571	1	0.616559	0.210026	ENSG00000276045
ENTPD4	0.0883828	1.2029	0.923	0.429	1	0.617898	0.209083	ENSG00000197217
GHDC	0.0887326	0.557479	0.769	0.286	1	0.618631	0.208569	ENSG00000167925
ZPR1	0.0886969	1.40647	0.923	0.286	1	0.618631	0.208569	ENSG00000109917
NFAT5	0.089069	1.3891	1	0.571	1	0.619456	0.20799	ENSG00000102908
LRPPRC	0.0894374	0.671481	0.923	0.714	1	0.621024	0.206892	ENSG00000138095
PPP2R2D	0.0899066	0.264495	1	0.857	1	0.622293	0.206005	ENSG00000175470
PPP3CA	0.0900701	0.771607	0.923	0.714	1	0.622928	0.205562	ENSG00000138814
CSTB	0.0902344	0.682445	1	1	1	0.62332	0.205289	ENSG00000160213
MORF4L2	0.090512	0.414794	1	0.857	1	0.623334	0.205279	ENSG00000123562
RELB	0.0907809	0.807788	0.923	0.714	1	0.624613	0.204389	ENSG00000104856
ZFC3H1	0.0912224	0.832444	1	0.714	1	0.62641	0.203141	ENSG00000133858
WDR90	0.0919682	0.266017	0.923	0.429	1	0.628305	0.201829	ENSG00000161996
S100A6	0.0921588	1.12613	1	1	1	0.628379	0.201779	ENSG00000197956
PLEKHB2	0.0926599	0.199035	0.846	0.857	1	0.629566	0.200959	ENSG00000115762
KDM5C	0.0929888	0.398685	0.923	0.857	1	0.630483	0.200327	ENSG00000126012
PPP2CA	0.0930788	0.239208	0.923	1	1	0.630483	0.200327	ENSG00000113575
HMOX1	0.0932633	0.950928	0.846	0.571	1	0.630947	0.200007	ENSG00000100292
MCM4	0.0939761	0.609032	0.846	0.143	1	0.6338	0.198047	ENSG00000104738
ADSL	0.0942626	0.666164	0.846	0.286	1	0.634244	0.197743	ENSG00000239900
MPRIP	0.0944772	0.823432	1	0.857	1	0.634717	0.19742	ENSG00000133030
CHD1	0.094673	0.950481	1	1	1	0.635787	0.196688	ENSG00000153922
CUL2	0.0949537	0.845036	0.923	0.571	1	0.636782	0.196009	ENSG00000108094
EIF2S1	0.096219	0.737113	0.923	0.714	1	0.641311	0.192931	ENSG00000134001
PRSS23	0.0963471	1.01507	0.923	0.429	1	0.641311	0.192931	ENSG00000150687
NXN	0.0968493	0.89864	0.769	0.286	1	0.641404	0.192868	ENSG00000167693
NXN	0.0968493	0.89864	0.769	0.286	1	0.641404	0.192868	ENSG00000280563
NXN	0.0968493	0.89864	0.769	0.286	1	0.641404	0.192868	ENSG00000281300
ZNF92	0.0967952	0.988214	0.923	0.571	1	0.641404	0.192868	ENSG00000146757
FBXO7	0.0978246	0.440281	0.923	0.857	1	0.643755	0.191279	ENSG00000100225
RASL10A	0.0980782	1.17734	0.769	0.286	1	0.644461	0.190803	ENSG00000100276
PVR	0.0985333	1.12536	0.923	0.571	1	0.64623	0.189613	ENSG00000073008
EIF5B	0.0991629	0.828121	1	0.857	1	0.648645	0.187993	ENSG00000158417
RELT	0.099303	0.633477	0.923	0.714	1	0.649318	0.187543	ENSG00000054967
FAM107B	0.0997442	0.743752	0.923	0.857	1	0.650733	0.186597	ENSG00000065809
LDLR	0.10031	0.58379	1	1	1	0.652094	0.18569	ENSG00000130164
MAP4K4	0.101093	0.576869	1	1	1	0.653885	0.184498	ENSG00000071054
ANXA1	0.101222	0.81065	0.923	1	1	0.654402	0.184155	ENSG00000135046
SEC13	0.102083	1.34791	1	0.286	1	0.65711	0.182362	ENSG00000157020
AGO2	0.102523	0.980155	0.923	0.571	1	0.657485	0.182114	ENSG00000123908
CAMTA1	0.102784	0.323685	0.923	1	1	0.657485	0.182114	ENSG00000171735
KLHL5	0.102519	0.685453	0.923	0.429	1	0.657485	0.182114	ENSG00000109790
PSMC6	0.102765	0.587036	1	0.857	1	0.657485	0.182114	ENSG00000100519
SERTAD2	0.102784	1.30531	1	0.571	1	0.657485	0.182114	ENSG00000179833
CXCL3	0.103711	0.929786	0.923	0.571	1	0.658349	0.181544	ENSG00000163734
NUDC	0.103705	1.18865	1	0.429	1	0.658349	0.181544	ENSG00000090273
CSNK1E	0.103778	0.690681	1	1	1	0.658512	0.181436	ENSG00000213923
PTX3	0.104103	1.7551	1	0.429	1	0.659131	0.181028	ENSG00000163661
SEMA3F	0.104629	0.678183	0.923	0.714	1	0.660535	0.180104	ENSG00000001617
RNF11	0.104837	0.17041	1	0.714	1	0.661499	0.179471	ENSG00000123091
SEMA4B	0.104896	0.966606	0.846	0.286	1	0.661499	0.179471	ENSG00000185033
KAT7	0.105113	1.2786	0.846	0.429	1	0.661892	0.179213	ENSG00000136504
OTUB1	0.105093	0.886198	0.923	0.571	1	0.661892	0.179213	ENSG00000167770
PTK2	0.105134	0.978976	1	0.714	1	0.661892	0.179213	ENSG00000169398
TNPO1	0.105403	1.1594	0.923	0.429	1	0.662052	0.179108	ENSG00000083312
CDS2	0.106047	0.932972	0.923	0.714	1	0.663348	0.178258	ENSG00000101290
NAA60	0.106067	0.447401	1	0.571	1	0.663348	0.178258	ENSG00000122390
SNRPB	0.105968	0.172434	0.923	1	1	0.663348	0.178258	ENSG00000125835
TOX2	0.105816	0.709981	0.769	0.286	1	0.663348	0.178258	ENSG00000124191
MICAL3	0.10635	1.14861	0.923	0.571	1	0.664163	0.177725	ENSG00000243156
DPY19L1	0.106431	0.863293	0.846	0.286	1	0.66419	0.177707	ENSG00000173852
HNRNPK	0.106405	0.50681	1	1	1	0.66419	0.177707	ENSG00000165119
CAPN15	0.106621	0.542423	0.923	0.714	1	0.664659	0.177401	ENSG00000282214
CAPN15	0.106621	0.542423	0.923	0.714	1	0.664659	0.177401	ENSG00000103326
GNAQ	0.106607	0.566032	1	0.857	1	0.664659	0.177401	ENSG00000156052
NAV2	0.106605	1.11204	0.923	0.429	1	0.664659	0.177401	ENSG00000166833
IFT22	0.106937	0.655198	0.923	0.571	1	0.665073	0.177131	ENSG00000128581
S100A16	0.106885	0.579732	1	1	1	0.665073	0.177131	ENSG00000188643
TJP2	0.106899	1.42976	0.923	0.286	1	0.665073	0.177131	ENSG00000119139
MRPL47	0.10814	0.461141	0.846	0.714	1	0.667915	0.175279	ENSG00000136522
CLTB	0.108355	0.824587	1	0.857	1	0.668513	0.17489	ENSG00000175416
MIR155HG	0.108648	1.1624	0.923	0.286	1	0.669208	0.174439	ENSG00000234883
KMT2E	0.109329	0.480129	0.923	1	1	0.671192	0.173153	ENSG00000005483
KLF7	0.109443	0.883239	1	0.714	1	0.671415	0.173009	ENSG00000118263
IGFBP7	0.110129	0.822958	1	1	1	0.673247	0.171825	ENSG00000163453
BLOC1S6	0.110309	0.156462	1	0.714	1	0.673638	0.171573	ENSG00000104164
GOLPH3	0.110272	0.0956031	0.769	0.571	1	0.673638	0.171573	ENSG00000113384
PSMA7	0.110266	0.802912	1	0.857	1	0.673638	0.171573	ENSG00000101182
PLCXD1	0.110425	1.38791	0.923	0.714	1	0.67387	0.171424	ENSG00000292344
PLCXD1	0.110425	1.38791	0.923	0.714	1	0.67387	0.171424	ENSG00000182378
NSUN2	0.110514	0.636954	0.923	0.571	1	0.673986	0.171349	ENSG00000037474
IFI27	0.110644	0.726205	1	1	1	0.674496	0.171021	ENSG00000275214
IFI27	0.110644	0.726205	1	1	1	0.674496	0.171021	ENSG00000165949
HDAC2	0.110728	0.500046	0.923	0.714	1	0.674554	0.170983	ENSG00000196591
FASTKD2	0.111102	1.16785	0.923	0.429	1	0.675978	0.170067	ENSG00000118246
PDE10A	0.11112	1.26591	0.923	0.286	1	0.675978	0.170067	ENSG00000112541
HIC1	0.111449	0.439799	1	0.857	1	0.676791	0.169545	ENSG00000177374
SBDS	0.111672	0.535013	1	1	1	0.677315	0.169209	ENSG00000126524
NCLN	0.112299	0.110351	0.769	0.429	1	0.678281	0.168591	ENSG00000125912
CHCHD2	0.112856	0.38417	1	1	1	0.680444	0.167208	ENSG00000106153
CTTNBP2NL	0.112872	0.925168	0.923	0.714	1	0.680444	0.167208	ENSG00000143079
PICALM	0.113072	0.517989	1	1	1	0.680786	0.166989	ENSG00000073921
B4GALT2	0.113817	0.920644	0.769	0.143	1	0.681944	0.166251	ENSG00000117411
EIF4G3	0.11366	0.693503	1	0.857	1	0.681944	0.166251	ENSG00000075151
GNL2	0.113822	0.472718	1	0.571	1	0.681944	0.166251	ENSG00000134697
VPS37A	0.113869	0.50344	0.846	0.571	1	0.681959	0.166242	ENSG00000155975
PTPN1	0.113995	0.33093	0.923	1	1	0.682014	0.166207	ENSG00000196396
PPAT	0.11421	0.935248	0.769	0.143	1	0.682462	0.165922	ENSG00000128059
SLC6A8	0.114228	0.974075	0.769	0.143	1	0.682462	0.165922	ENSG00000130821
VLDLR	0.114823	0.939845	0.692	0.286	1	0.683585	0.165208	ENSG00000147852
CUL3	0.115324	0.682533	1	0.714	1	0.684075	0.164896	ENSG00000036257
POM121C	0.115093	1.29769	1	0.571	1	0.684075	0.164896	ENSG00000272391
RCN1	0.115256	1.21323	1	0.571	1	0.684075	0.164896	ENSG00000049449
SHANK3	0.115204	0.729171	0.923	1	1	0.684075	0.164896	ENSG00000251322
RPL36AL	0.116281	0.317061	1	1	1	0.686699	0.163234	ENSG00000165502
RGS16	0.11646	0.659907	0.846	0.714	1	0.68729	0.16286	ENSG00000143333
RNF168	0.116508	0.369636	1	0.714	1	0.687343	0.162826	ENSG00000163961
ITCH	0.117936	0.807494	0.923	0.571	1	0.689216	0.161644	ENSG00000078747
KDM6B	0.117169	0.151114	0.923	1	1	0.689216	0.161644	ENSG00000132510
MLF1	0.117868	0.210765	0.846	1	1	0.689216	0.161644	ENSG00000178053
NAB1	0.117576	0.916844	0.923	0.286	1	0.689216	0.161644	ENSG00000138386
NR1D1	0.117696	0.743187	0.846	0.571	1	0.689216	0.161644	ENSG00000126368
PANX1	0.117612	0.449108	0.846	0.286	1	0.689216	0.161644	ENSG00000110218
PKIG	0.11741	0.85825	0.923	0.714	1	0.689216	0.161644	ENSG00000168734
PTTG1IP	0.117527	0.862422	1	0.571	1	0.689216	0.161644	ENSG00000183255
SYNE3	0.118209	0.877547	0.769	0.286	1	0.690347	0.160932	ENSG00000176438
APLNR	0.118386	0.803187	0.769	0.571	1	0.690686	0.16072	ENSG00000134817
ADM	0.118622	1.15898	0.923	0.857	1	0.690867	0.160606	ENSG00000148926
NAA25	0.118717	0.916434	0.923	0.714	1	0.690872	0.160602	ENSG00000111300
GOSR2	0.119013	0.577299	0.769	0.429	1	0.691177	0.160411	ENSG00000108433
KIF13A	0.118953	0.57818	0.769	0.286	1	0.691177	0.160411	ENSG00000137177
HNRNPA1	0.119188	0.443918	1	1	1	0.691355	0.160299	ENSG00000135486
PPM1G	0.119226	0.555525	0.923	0.857	1	0.691355	0.160299	ENSG00000115241
CCNY	0.119529	0.418473	0.923	0.857	1	0.691918	0.159945	ENSG00000108100
PITPNM2	0.12003	0.84902	0.769	0.429	1	0.692448	0.159613	ENSG00000090975
SMARCC1	0.120041	0.421909	0.923	0.857	1	0.692448	0.159613	ENSG00000173473
FABP5	0.121534	0.644122	1	1	1	0.697104	0.156702	ENSG00000164687
FBXO3	0.121339	0.875638	1	0.714	1	0.697104	0.156702	ENSG00000110429
GALNT2	0.121578	1.17246	1	0.429	1	0.697104	0.156702	ENSG00000143641
LSM7	0.121612	0.715006	0.923	0.857	1	0.697104	0.156702	ENSG00000130332
MED23	0.121471	0.560542	0.923	0.571	1	0.697104	0.156702	ENSG00000112282
SET	0.121437	0.518297	0.923	0.857	1	0.697104	0.156702	ENSG00000119335
TSC22D1	0.121858	0.496391	1	1	1	0.697532	0.156436	ENSG00000102804
NOB1	0.122026	0.764232	0.846	0.571	1	0.697867	0.156227	ENSG00000141101
TNFRSF1A	0.122442	0.798807	1	1	1	0.698614	0.155763	ENSG00000067182
EAF1	0.122808	0.0358902	1	0.714	1	0.698775	0.155663	ENSG00000144597
NGDN	0.122922	0.521934	0.923	0.714	1	0.698775	0.155663	ENSG00000129460
STARD4	0.1229	1.03515	0.846	0.571	1	0.698775	0.155663	ENSG00000164211
RNF19A	0.123133	0.891795	1	0.571	1	0.699136	0.155438	ENSG00000034677
SYNJ2	0.123739	0.580054	0.769	0.286	1	0.701201	0.154158	ENSG00000078269
SSH1	0.124504	0.178302	0.923	0.857	1	0.703542	0.15271	ENSG00000084112
GAS6	0.125041	1.36208	1	0.857	1	0.705587	0.151449	ENSG00000183087
GOLGB1	0.12512	0.520846	1	0.857	1	0.705786	0.151327	ENSG00000173230
HPRT1	0.125501	0.372938	0.923	0.571	1	0.70658	0.150839	ENSG00000165704
UTP3	0.125837	0.363177	0.846	0.429	1	0.707326	0.150381	ENSG00000132467
CFL1	0.125884	0.308647	1	1	1	0.707362	0.150358	ENSG00000172757
RAD23B	0.126316	0.310616	0.923	0.857	1	0.707972	0.149984	ENSG00000119318
ACO2	0.12693	0.315396	0.923	0.714	1	0.708878	0.149428	ENSG00000100412
ARMC8	0.127277	1.08141	0.923	0.571	1	0.708878	0.149428	ENSG00000114098
NAPG	0.127085	0.730901	0.923	0.571	1	0.708878	0.149428	ENSG00000134265
RAPGEF1	0.127538	0.0970732	0.923	0.714	1	0.708878	0.149428	ENSG00000107263
SIPA1L2	0.127132	0.528556	0.846	0.714	1	0.708878	0.149428	ENSG00000116991
TRAK1	0.126943	1.13831	0.846	0.286	1	0.708878	0.149428	ENSG00000182606
MGRN1	0.12796	0.123486	0.923	0.714	1	0.70939	0.149115	ENSG00000102858
SIN3B	0.127907	1.17837	0.846	0.429	1	0.70939	0.149115	ENSG00000127511
USF3	0.127805	0.99963	1	0.429	1	0.70939	0.149115	ENSG00000176542
ITGB5	0.12853	1.06196	1	0.571	1	0.709935	0.148782	ENSG00000082781
VDAC2	0.12848	1.07157	0.846	0.571	1	0.709935	0.148782	ENSG00000165637
GJA4	0.128677	0.669105	0.692	0	1	0.709968	0.148761	ENSG00000187513
MRPL42	0.128917	0.811327	0.846	0.571	1	0.70997	0.14876	ENSG00000198015
RELA	0.129022	0.0978863	0.923	0.857	1	0.710069	0.148699	ENSG00000173039
EFR3A	0.129187	1.03198	0.846	0.571	1	0.710756	0.14828	ENSG00000132294
MFHAS1	0.130033	0.603639	0.923	0.429	1	0.713153	0.146817	ENSG00000285022
MFHAS1	0.130033	0.603639	0.923	0.429	1	0.713153	0.146817	ENSG00000147324
HSPBP1	0.130551	0.906168	0.923	0.429	1	0.71464	0.145912	ENSG00000133265
CYSTM1	0.131134	0.737774	0.923	0.857	1	0.715777	0.145222	ENSG00000120306
DCAF13	0.130929	0.185328	0.846	0.857	1	0.715777	0.145222	ENSG00000164934
ECM1	0.131025	0.492903	0.769	0.429	1	0.715777	0.145222	ENSG00000143369
PGRMC1	0.131546	1.35584	0.923	0.714	1	0.715799	0.145209	ENSG00000101856
PXN	0.131526	0.622647	0.923	1	1	0.715799	0.145209	ENSG00000089159
PCDH1	0.132376	0.429503	0.769	0.429	1	0.71795	0.143906	ENSG00000156453
CTU1	0.132445	0.52924	0.846	0.571	1	0.717993	0.14388	ENSG00000142544
TUBB2A	0.132695	0.833598	0.923	0.571	1	0.719126	0.143195	ENSG00000137267
KLHL4	0.133129	0.407704	0.692	0	1	0.720507	0.142362	ENSG00000102271
SDC3	0.133144	1.48777	0.846	0.286	1	0.720507	0.142362	ENSG00000162512
DCP1A	0.13337	0.371104	0.923	0.571	1	0.72076	0.142209	ENSG00000272886
TTC9	0.134187	0.744633	0.846	0.286	1	0.723152	0.14077	ENSG00000133985
IGHMBP2	0.135042	0.762895	0.846	0.286	1	0.725616	0.139293	ENSG00000132740
PPP5C	0.135374	0.80642	0.923	0.429	1	0.726622	0.138692	ENSG00000011485
PSMA3	0.13542	0.425536	1	0.857	1	0.726642	0.138679	ENSG00000100567
NUCB1	0.136373	0.533849	1	1	1	0.727077	0.138419	ENSG00000104805
SEC22C	0.136013	0.323896	0.846	0.714	1	0.727077	0.138419	ENSG00000093183
C1D	0.136874	0.288373	0.846	0.714	1	0.727248	0.138318	ENSG00000197223
DDAH2	0.136845	0.651471	0.923	0.857	1	0.727248	0.138318	ENSG00000213722
DDAH2	0.136845	0.651471	0.923	0.857	1	0.727248	0.138318	ENSG00000226634
DDAH2	0.136845	0.651471	0.923	0.857	1	0.727248	0.138318	ENSG00000228128
DDAH2	0.136845	0.651471	0.923	0.857	1	0.727248	0.138318	ENSG00000233076
DDAH2	0.136845	0.651471	0.923	0.857	1	0.727248	0.138318	ENSG00000227317
DDAH2	0.136845	0.651471	0.923	0.857	1	0.727248	0.138318	ENSG00000206395
DDAH2	0.136845	0.651471	0.923	0.857	1	0.727248	0.138318	ENSG00000225635
FOXK2	0.137193	0.966551	1	0.571	1	0.727248	0.138318	ENSG00000141568
RAB11FIP2	0.13691	0.885021	0.846	0.429	1	0.727248	0.138318	ENSG00000107560
RASA2	0.137371	0.488977	0.923	0.857	1	0.727248	0.138318	ENSG00000155903
SRPRB	0.137502	0.451828	0.769	0.429	1	0.727248	0.138318	ENSG00000144867
UBA6	0.137379	0.879999	1	0.714	1	0.727248	0.138318	ENSG00000033178
ADA	0.138128	0.85057	0.846	0.429	1	0.729018	0.137262	ENSG00000196839
PTPRA	0.138281	0.545502	0.923	1	1	0.729164	0.137175	ENSG00000132670
GNG12	0.138478	0.236349	0.923	1	1	0.72976	0.13682	ENSG00000172380
MYO1D	0.138995	0.482523	0.769	0.143	1	0.731595	0.135729	ENSG00000176658
COL15A1	0.139112	0.509676	0.692	0.143	1	0.731771	0.135625	ENSG00000204291
ZRANB1	0.13939	1.22485	0.923	0.571	1	0.733009	0.134891	ENSG00000019995
BTBD7	0.139644	0.578387	1	1	1	0.73368	0.134493	ENSG00000277222
BTBD7	0.139644	0.578387	1	1	1	0.73368	0.134493	ENSG00000011114
EMC6	0.139901	0.448015	0.923	0.714	1	0.73435	0.134097	ENSG00000127774
CYB5R3	0.140076	0.4202	1	1	1	0.734377	0.134081	ENSG00000100243
LUC7L	0.141338	0.476101	1	0.857	1	0.736637	0.132747	ENSG00000007392
MAPK8	0.141363	0.568624	0.846	0.571	1	0.736637	0.132747	ENSG00000107643
BNIP2	0.142566	0.0813017	1	1	1	0.738562	0.131613	ENSG00000140299
CNKSR3	0.14341	0.7969	0.846	0.571	1	0.740921	0.130228	ENSG00000153721
CCDC86	0.143514	0.331051	0.846	0.429	1	0.741197	0.130066	ENSG00000110104
NFKBIA	0.144113	0.605209	1	1	1	0.74301	0.129005	ENSG00000100906
ATP6AP1	0.144256	1.11153	0.923	0.571	1	0.743401	0.128777	ENSG00000071553
BCAR1	0.144274	0.628804	0.923	0.857	1	0.743401	0.128777	ENSG00000050820
GID8	0.144964	0.60261	0.923	0.571	1	0.744524	0.128122	ENSG00000101193
GNL3	0.144952	0.851117	0.923	0.571	1	0.744524	0.128122	ENSG00000163938
CD68	0.145131	0.852982	0.769	0.429	1	0.745164	0.127748	ENSG00000129226
WIZ	0.145209	0.954436	0.846	0.286	1	0.745343	0.127644	ENSG00000011451
MRPS35	0.145288	0.944628	0.923	0.429	1	0.745477	0.127566	ENSG00000061794
UBAP1	0.145779	0.220231	1	0.857	1	0.746506	0.126967	ENSG00000165006
FOXN2	0.146806	0.0184048	0.769	1	1	0.747113	0.126614	ENSG00000170802
GSE1	0.146929	1.11695	0.846	0.429	1	0.747113	0.126614	ENSG00000131149
NR3C1	0.146333	0.576804	1	0.857	1	0.747113	0.126614	ENSG00000113580
SNU13	0.14672	0.524176	1	1	1	0.747113	0.126614	ENSG00000100138
SYVN1	0.1467	0.0996689	0.846	0.571	1	0.747113	0.126614	ENSG00000162298
VEGFC	0.146606	1.86649	0.769	0.143	1	0.747113	0.126614	ENSG00000150630
ZFP91	0.146665	1.25122	0.923	0.429	1	0.747113	0.126614	ENSG00000186660
MYC	0.147223	0.204794	1	1	1	0.747732	0.126254	ENSG00000136997
BMP6	0.147472	0.633161	0.769	0.286	1	0.748237	0.125961	ENSG00000153162
PMPCA	0.14784	0.372779	1	0.571	1	0.748676	0.125706	ENSG00000165688
SEMA6B	0.147717	0.939242	1	0.857	1	0.748676	0.125706	ENSG00000167680
FAM168B	0.147912	0.885469	0.846	0.571	1	0.748754	0.125661	ENSG00000152102
TBC1D1	0.148788	1.30605	0.923	0.429	1	0.750854	0.124444	ENSG00000065882
ORAI2	0.148962	0.894839	0.846	0.571	1	0.751381	0.12414	ENSG00000160991
PSMD8	0.149649	1.01829	1	0.714	1	0.752235	0.123647	ENSG00000099341
BTBD19	0.149853	0.414441	0.846	0.571	1	0.752293	0.123613	ENSG00000222009
MIR222HG	0.150399	0.42683	1	0.857	1	0.753293	0.123036	ENSG00000270069
ZNF267	0.150384	0.417019	0.923	0.857	1	0.753293	0.123036	ENSG00000185947
STK40	0.150725	0.0453657	0.846	0.571	1	0.753842	0.12272	ENSG00000196182
PTP4A1	0.151122	0.270546	0.923	0.857	1	0.754813	0.122161	ENSG00000112245
ACVRL1	0.1517	1.06238	1	0.714	1	0.756542	0.121167	ENSG00000139567
TES	0.152136	0.18651	1	0.714	1	0.757844	0.12042	ENSG00000135269
MAGOH	0.15256	0.528977	1	0.857	1	0.758436	0.120081	ENSG00000162385
PCOLCE	0.152525	2.14697	0.615	0.286	1	0.758436	0.120081	ENSG00000106333
ATG4A	0.153032	0.982783	0.923	0.429	1	0.759196	0.119646	ENSG00000101844
UQCRFS1	0.152966	0.33702	1	0.857	1	0.759196	0.119646	ENSG00000169021
WDR1	0.153021	0.592231	0.923	0.857	1	0.759196	0.119646	ENSG00000071127
SMG7	0.153567	0.44795	0.923	0.714	1	0.760163	0.119093	ENSG00000116698
MED17	0.153753	0.973958	0.846	0.571	1	0.760237	0.119051	ENSG00000042429
PPP1CC	0.153691	0.425119	1	0.857	1	0.760237	0.119051	ENSG00000186298
CXCL1	0.15432	1.21165	0.692	0.143	1	0.761739	0.118194	ENSG00000163739
GLTP	0.155799	0.286884	0.923	0.714	1	0.765127	0.116266	ENSG00000139433
MOB1A	0.155741	0.859664	0.923	0.714	1	0.765127	0.116266	ENSG00000114978
RBM15	0.155981	0.606953	0.923	0.714	1	0.765587	0.116005	ENSG00000162775
ADIRF	0.156562	0.785996	0.923	1	1	0.766925	0.115247	ENSG00000148671
CHIC2	0.156864	1.01823	0.923	0.571	1	0.767322	0.115023	ENSG00000109220
PSMD5	0.157815	0.783847	0.846	0.143	1	0.769162	0.113982	ENSG00000095261
ZNF626	0.158837	0.0150204	0.615	0.429	1	0.771384	0.112729	ENSG00000188171
BAHD1	0.15906	0.840195	0.923	0.429	1	0.77155	0.112636	ENSG00000140320
WASL	0.159407	1.23033	0.923	0.429	1	0.772803	0.111931	ENSG00000106299
KRT18	0.159944	0.688836	0.846	0.429	1	0.774542	0.110955	ENSG00000111057
CLUH	0.160053	0.652822	0.769	0.286	1	0.774855	0.11078	ENSG00000132361
CYC1	0.160366	0.709102	0.923	0.714	1	0.775078	0.110655	ENSG00000179091
RAB8A	0.161498	0.491042	0.769	0.571	1	0.776441	0.109892	ENSG00000167461
PSMB4	0.161551	0.482017	0.923	1	1	0.77648	0.10987	ENSG00000159377
HABP4	0.162473	0.753336	0.846	0.429	1	0.77882	0.108563	ENSG00000130956
ESAM	0.163402	0.693447	0.923	1	1	0.781269	0.1072	ENSG00000149564
PCGF5	0.163369	0.561595	0.923	0.571	1	0.781269	0.1072	ENSG00000180628
MED15	0.16447	0.642499	1	0.714	1	0.7842	0.105573	ENSG00000099917
MYO1E	0.164544	0.976915	0.846	0.571	1	0.7842	0.105573	ENSG00000157483
APLP2	0.164765	0.915892	1	0.857	1	0.784301	0.105517	ENSG00000084234
ANXA7	0.165368	0.910858	0.923	0.571	1	0.784675	0.10531	ENSG00000138279
CNST	0.165295	0.579552	1	0.714	1	0.784675	0.10531	ENSG00000162852
DYRK1A	0.165895	0.219179	0.923	0.857	1	0.785545	0.104829	ENSG00000157540
PSMD14	0.165681	0.278415	0.923	0.714	1	0.785545	0.104829	ENSG00000115233
PTAR1	0.165903	0.697136	0.923	0.714	1	0.785545	0.104829	ENSG00000188647
RNF135	0.165803	0.0179357	0.769	0.571	1	0.785545	0.104829	ENSG00000291712
RNF135	0.165803	0.0179357	0.769	0.571	1	0.785545	0.104829	ENSG00000181481
YWHAZ	0.165968	0.237617	1	1	1	0.785545	0.104829	ENSG00000164924
PPP4C	0.166245	0.189944	1	1	1	0.786471	0.104317	ENSG00000149923
STX2	0.166992	0.409458	0.846	0.571	1	0.788674	0.103103	ENSG00000111450
GALNT6	0.167289	1.15961	0.846	0.286	1	0.788747	0.103062	ENSG00000139629
MCF2L2	0.167369	0.363912	0.769	0.143	1	0.788747	0.103062	ENSG00000053524
PSMB2	0.167278	0.526978	0.923	0.714	1	0.788747	0.103062	ENSG00000126067
FHOD1	0.167956	0.957256	1	0.714	1	0.789707	0.102534	ENSG00000135723
SPSB1	0.16802	0.655798	0.846	0.571	1	0.789707	0.102534	ENSG00000171621
CTSH	0.168433	0.34328	0.923	0.714	1	0.790111	0.102312	ENSG00000103811
KIF21B	0.168316	0.163998	0.923	0.571	1	0.790111	0.102312	ENSG00000116852
PJA1	0.168723	0.431554	0.769	0	1	0.790541	0.102075	ENSG00000181191
CD9	0.168964	0.634437	1	0.857	1	0.790897	0.10188	ENSG00000010278
UBA2	0.169162	0.29956	0.923	0.714	1	0.791184	0.101723	ENSG00000126261
MRPL32	0.169214	0.573953	0.923	0.857	1	0.791214	0.101706	ENSG00000106591
CENPV	0.169315	0.511786	0.692	0.286	1	0.791258	0.101682	ENSG00000166582
SEC24A	0.169406	0.640039	0.846	0.429	1	0.791258	0.101682	ENSG00000113615
LACTB	0.169687	0.529857	0.846	0.429	1	0.791783	0.101394	ENSG00000103642
R3HCC1	0.169727	0.828346	0.846	0.286	1	0.791783	0.101394	ENSG00000104679
PROCR	0.169992	0.255879	0.846	0.286	1	0.792034	0.101256	ENSG00000101000
RRAS2	0.170178	0.905561	1	0.571	1	0.792034	0.101256	ENSG00000133818
NBL1	0.171394	0.340022	1	1	1	0.795414	0.0994068	ENSG00000158747
PDXK	0.171504	0.770459	0.923	0.571	1	0.795502	0.0993585	ENSG00000160209
DYNLT3	0.172245	0.653668	1	0.857	1	0.796572	0.0987751	ENSG00000165169
IRF2BP2	0.172056	0.684014	1	0.857	1	0.796572	0.0987751	ENSG00000168264
DIAPH2	0.173805	0.836232	0.923	0.571	1	0.800615	0.0965765	ENSG00000147202
MED14	0.173788	0.79735	0.846	0.286	1	0.800615	0.0965765	ENSG00000180182
SLC25A5	0.173648	0.761687	0.923	0.857	1	0.800615	0.0965765	ENSG00000005022
ERO1A	0.174784	0.151383	0.846	0.857	1	0.801056	0.096337	ENSG00000197930
HSPA9	0.175159	0.483691	0.846	0.857	1	0.801056	0.096337	ENSG00000113013
PLPP5	0.174671	1.21772	1	0.429	1	0.801056	0.096337	ENSG00000147535
RPL17	0.174811	0.803635	0.846	0.571	1	0.801056	0.096337	ENSG00000265681
STAT5A	0.175088	0.927798	1	0.429	1	0.801056	0.096337	ENSG00000126561
UBXN6	0.174571	0.784191	0.923	0.571	1	0.801056	0.096337	ENSG00000167671
SMARCA4	0.175386	0.654405	0.769	0.429	1	0.801333	0.0961868	ENSG00000127616
FEM1C	0.175453	0.882306	1	0.571	1	0.801411	0.0961448	ENSG00000145780
HDGF	0.175983	0.743869	0.846	0.857	1	0.801538	0.0960758	ENSG00000143321
SENP6	0.176031	0.445883	0.923	0.857	1	0.801538	0.0960758	ENSG00000112701
AKIRIN2	0.176201	0.052016	0.923	1	1	0.801667	0.0960062	ENSG00000135334
PTBP2	0.176291	0.773389	0.923	0.714	1	0.801867	0.0958977	ENSG00000117569
DUSP18	0.176388	0.963373	0.923	0.286	1	0.801946	0.0958547	ENSG00000167065
GJA1	0.177052	0.279462	0.923	1	1	0.802599	0.0955012	ENSG00000152661
MMD	0.177767	0.366835	0.846	0.571	1	0.803117	0.0952212	ENSG00000108960
MX1	0.177483	0.472329	0.923	0.571	1	0.803117	0.0952212	ENSG00000157601
PACSIN2	0.177356	0.689719	0.923	0.429	1	0.803117	0.0952212	ENSG00000100266
SETD7	0.178007	0.198672	0.923	1	1	0.803762	0.0948724	ENSG00000145391
ACSL5	0.178933	0.609056	0.923	0.571	1	0.804203	0.0946341	ENSG00000197142
NSD1	0.178856	0.0300242	1	0.571	1	0.804203	0.0946341	ENSG00000165671
APP	0.179686	0.593232	1	1	1	0.805534	0.0939159	ENSG00000142192
GLS	0.179793	0.740493	1	0.857	1	0.805534	0.0939159	ENSG00000115419
IRGQ	0.179829	0.560018	0.846	0.429	1	0.805534	0.0939159	ENSG00000167378
MYCN	0.17964	0.309505	0.692	0	1	0.805534	0.0939159	ENSG00000134323
WEE1	0.179741	0.376234	0.769	0.143	1	0.805534	0.0939159	ENSG00000166483
SLC25A3	0.18018	0.468533	1	0.857	1	0.806121	0.0935999	ENSG00000075415
TSPAN15	0.180269	0.780946	0.923	0.571	1	0.806121	0.0935999	ENSG00000099282
ZFYVE28	0.180246	0.140984	0.923	0.714	1	0.806121	0.0935999	ENSG00000159733
TIMP1	0.180534	0.316009	1	1	1	0.806307	0.0934998	ENSG00000102265
TOP1MT	0.181175	0.615411	0.769	0.143	1	0.808013	0.0925817	ENSG00000184428
PANK3	0.181255	1.13763	0.846	0.286	1	0.808162	0.0925018	ENSG00000120137
CTPS1	0.181334	0.873857	1	0.429	1	0.808305	0.0924245	ENSG00000171793
PLEKHM1	0.181513	0.481397	0.923	0.714	1	0.80869	0.0922179	ENSG00000276358
PLEKHM1	0.181513	0.481397	0.923	0.714	1	0.80869	0.0922179	ENSG00000277111
PLEKHM1	0.181513	0.481397	0.923	0.714	1	0.80869	0.0922179	ENSG00000225190
VEGFA	0.1815	0.910452	0.923	0.714	1	0.80869	0.0922179	ENSG00000112715
PI4KA	0.181997	0.841104	0.923	0.571	1	0.809262	0.0919107	ENSG00000241973
PRPF4B	0.182014	0.486097	1	1	1	0.809262	0.0919107	ENSG00000112739
ASAP1	0.1822	0.53299	0.923	1	1	0.809503	0.0917818	ENSG00000153317
AKAP9	0.182765	0.0260313	1	0.857	1	0.810352	0.0913265	ENSG00000127914
CD81	0.182708	0.554935	1	1	1	0.810352	0.0913265	ENSG00000110651
RBMS1	0.182772	0.537721	1	1	1	0.810352	0.0913265	ENSG00000153250
UBALD1	0.183489	0.702251	0.769	0.429	1	0.811619	0.0906478	ENSG00000153443
UBL3	0.184154	0.449781	0.923	0.857	1	0.812146	0.0903659	ENSG00000122042
RASGRF2	0.184591	0.590058	0.923	0.571	1	0.812406	0.0902271	ENSG00000113319
ETV3	0.185619	0.840769	1	0.714	1	0.813575	0.0896025	ENSG00000117036
ISG20	0.185797	0.547821	0.923	0.714	1	0.813575	0.0896025	ENSG00000172183
MAFG	0.185761	0.891111	1	0.714	1	0.813575	0.0896025	ENSG00000197063
MT-CYB	0.185729	0.558196	1	1	1	0.813575	0.0896025	ENSG00000198727
RGPD5	0.185553	0.960886	0.923	0.571	1	0.813575	0.0896025	ENSG00000015568
KLHL18	0.186624	0.355909	1	1	1	0.814751	0.0889752	ENSG00000114648
SOCS6	0.186598	0.45405	0.769	0.429	1	0.814751	0.0889752	ENSG00000170677
TRIM35	0.18654	0.276611	0.769	0.429	1	0.814751	0.0889752	ENSG00000104228
CPEB4	0.186858	0.488345	1	0.857	1	0.815365	0.0886478	ENSG00000113742
IREB2	0.187004	0.0815757	1	0.857	1	0.815638	0.0885026	ENSG00000136381
SREK1	0.188836	0.601875	1	1	1	0.819671	0.0863605	ENSG00000153914
CYP1B1	0.189129	1.52007	0.923	0.714	1	0.820534	0.0859035	ENSG00000138061
PRPF19	0.189226	0.918062	0.846	0.429	1	0.820749	0.0857894	ENSG00000110107
RBBP7	0.189539	0.256716	1	0.857	1	0.821493	0.0853962	ENSG00000102054
LDLRAD3	0.189933	0.0147176	0.769	0.571	1	0.822587	0.084818	ENSG00000179241
IL1RAP	0.190253	1.08027	0.923	0.286	1	0.823049	0.0845746	ENSG00000196083
NR2C1	0.190232	0.00307221	0.923	0.571	1	0.823049	0.0845746	ENSG00000120798
TTLL5	0.190138	0.171875	0.923	1	1	0.823049	0.0845746	ENSG00000119685
CD34	0.190731	0.619142	0.769	0.571	1	0.824193	0.0839708	ENSG00000174059
EZR	0.191947	0.0880277	0.923	0.857	1	0.825786	0.0831325	ENSG00000092820
GLRX5	0.192424	0.563746	0.923	0.571	1	0.8266	0.0827046	ENSG00000182512
DNAJC3	0.192764	1.20621	1	0.571	1	0.827318	0.0823274	ENSG00000102580
PIP5KL1	0.192835	0.434475	0.615	0.143	1	0.827318	0.0823274	ENSG00000167103
RDH11	0.193154	0.971287	0.846	0.429	1	0.82789	0.0820271	ENSG00000072042
NEDD4L	0.193414	0.110008	0.769	0.286	1	0.828371	0.0817751	ENSG00000049759
KATNB1	0.194291	0.158392	0.846	0.429	1	0.830526	0.0806468	ENSG00000140854
NR2F6	0.194845	0.92336	0.769	0.286	1	0.83074	0.0805348	ENSG00000160113
PECAM1	0.194696	0.677983	0.923	0.857	1	0.83074	0.0805348	ENSG00000261371
SH3RF1	0.194788	0.985807	0.923	0.571	1	0.83074	0.0805348	ENSG00000154447
CPNE8	0.195364	1.09595	1	0.571	1	0.832064	0.0798432	ENSG00000139117
ENG	0.197042	0.51221	1	1	1	0.834344	0.0786546	ENSG00000106991
CA5B	0.197968	0.204963	0.769	0.571	1	0.835677	0.0779616	ENSG00000169239
WWTR1	0.197988	0.58696	1	0.857	1	0.835677	0.0779616	ENSG00000018408
IL6	0.198235	0.563888	0.692	0.143	1	0.835839	0.0778772	ENSG00000136244
LSM12	0.198234	0.105735	0.923	0.857	1	0.835839	0.0778772	ENSG00000161654
SKI	0.198778	0.721735	1	0.857	1	0.837284	0.0771272	ENSG00000157933
CAPNS1	0.199091	0.591408	1	1	1	0.837853	0.076832	ENSG00000126247
NPHP3	0.199203	0.042804	0.846	0.571	1	0.837853	0.076832	ENSG00000113971
GNA13	0.200851	0.287069	0.923	1	1	0.841858	0.0747612	ENSG00000120063
SMC1A	0.200874	0.177603	0.769	0.571	1	0.841858	0.0747612	ENSG00000072501
ELF4	0.20144	1.049	0.846	0.286	1	0.842415	0.0744741	ENSG00000102034
ZCCHC3	0.201491	0.794299	0.846	0.286	1	0.842415	0.0744741	ENSG00000247315
C1orf52	0.201617	0.398081	0.923	0.714	1	0.842447	0.0744574	ENSG00000162642
KATNAL1	0.201644	0.100056	0.769	0.571	1	0.842447	0.0744574	ENSG00000102781
PPP6R1	0.201564	0.619409	0.923	0.714	1	0.842447	0.0744574	ENSG00000105063
RCL1	0.202283	1.02534	0.923	0.429	1	0.844102	0.0736051	ENSG00000120158
KDELR2	0.202679	0.963123	1	0.714	1	0.844354	0.0734753	ENSG00000136240
ZC3H12A	0.202498	0.612266	0.923	0.571	1	0.844354	0.0734753	ENSG00000163874
SNX12	0.203138	0.33663	0.769	0.286	1	0.844829	0.0732311	ENSG00000147164
EFTUD2	0.203521	0.29835	0.846	0.571	1	0.84561	0.0728298	ENSG00000108883
PAK2	0.203671	0.533217	0.923	0.714	1	0.846032	0.0726132	ENSG00000180370
FXR1	0.204382	0.367383	1	0.857	1	0.847163	0.072033	ENSG00000114416
LGALSL	0.204467	0.301828	1	0.571	1	0.847246	0.0719907	ENSG00000119862
STOML2	0.204938	0.456277	0.846	0.571	1	0.847789	0.0717123	ENSG00000165283
ACADVL	0.206765	0.511009	1	1	1	0.850354	0.0704003	ENSG00000072778
PA2G4	0.206998	0.711283	0.923	0.857	1	0.850425	0.0703641	ENSG00000170515
LAMP1	0.207892	0.485827	0.846	0.857	1	0.850963	0.0700894	ENSG00000185896
RTF1	0.208081	0.530366	1	0.857	1	0.850963	0.0700894	ENSG00000137815
SPATS2	0.208089	0.169269	1	0.714	1	0.850963	0.0700894	ENSG00000123352
UBE2Q2	0.207846	1.0497	0.923	0.714	1	0.850963	0.0700894	ENSG00000140367
USP13	0.20834	0.732332	0.846	0.429	1	0.851387	0.0698728	ENSG00000058056
NES	0.208755	0.504751	0.692	0.143	1	0.851683	0.0697221	ENSG00000132688
ADAM15	0.208965	0.691871	0.923	0.714	1	0.85194	0.069591	ENSG00000143537
GRPEL1	0.209157	0.0877663	0.923	1	1	0.852521	0.069295	ENSG00000109519
ARID5B	0.209681	0.782425	1	1	1	0.853203	0.0689477	ENSG00000150347
HSF2	0.209717	0.0429475	0.846	0.714	1	0.853203	0.0689477	ENSG00000025156
AHNAK	0.210267	0.226779	1	1	1	0.853501	0.0687958	ENSG00000124942
DHX9	0.210408	0.355299	1	1	1	0.853646	0.0687223	ENSG00000135829
SRPK2	0.211203	0.694114	0.923	0.571	1	0.855602	0.0677281	ENSG00000135250
TUSC1	0.21123	0.719968	0.923	0.571	1	0.855602	0.0677281	ENSG00000198680
KCTD9	0.212206	0.125962	0.846	0.714	1	0.85691	0.0670646	ENSG00000104756
YRDC	0.212408	0.219221	0.923	0.714	1	0.857328	0.066853	ENSG00000196449
TMEM150A	0.212733	0.529305	0.769	0.286	1	0.857799	0.0666144	ENSG00000168890
HMGB3	0.213557	0.61627	0.846	0.286	1	0.859289	0.0658608	ENSG00000029993
USP46	0.213501	0.645422	0.846	0.429	1	0.859289	0.0658608	ENSG00000109189
NUDT4	0.213884	0.687434	0.923	0.714	1	0.859512	0.0657478	ENSG00000173598
UBE2L3	0.213889	0.426945	0.923	0.857	1	0.859512	0.0657478	ENSG00000185651
ITGA6	0.21429	0.856285	0.923	0.429	1	0.860129	0.0654364	ENSG00000091409
USP9X	0.214284	0.710286	0.923	0.714	1	0.860129	0.0654364	ENSG00000124486
NOL4L	0.21504	0.492376	0.923	0.857	1	0.861945	0.0645203	ENSG00000197183
PRELID1	0.215197	0.476198	1	1	1	0.862377	0.0643026	ENSG00000169230
PBX3	0.215299	0.747972	0.923	0.429	1	0.862586	0.0641976	ENSG00000167081
RPF1	0.215905	0.756717	0.846	0.429	1	0.863026	0.0639763	ENSG00000117133
THAP2	0.215808	1.26242	1	0.286	1	0.863026	0.0639763	ENSG00000173451
DBF4	0.216385	0.611527	0.846	0.429	1	0.863571	0.0637022	ENSG00000006634
TMEM51	0.21639	0.00814918	0.846	0.714	1	0.863571	0.0637022	ENSG00000171729
SGSH	0.216634	0.587832	0.923	0.571	1	0.864149	0.0634114	ENSG00000181523
IPO5	0.21683	0.592213	0.923	0.714	1	0.864336	0.0633174	ENSG00000065150
RASSF8	0.21754	1.11558	0.923	0.286	1	0.866318	0.0623228	ENSG00000123094
GNAI1	0.21846	0.0186345	1	0.857	1	0.868548	0.0612062	ENSG00000127955
CRKL	0.219093	0.445862	0.769	0.143	1	0.869567	0.0606967	ENSG00000099942
BCL7A	0.219536	1.02264	0.846	0.286	1	0.869847	0.0605572	ENSG00000110987
EPB41L4A-AS1	0.21942	0.727781	1	0.714	1	0.869847	0.0605572	ENSG00000224032
IAH1	0.219501	0.760226	0.923	0.857	1	0.869847	0.0605572	ENSG00000134330
SMNDC1	0.219573	0.76622	1	0.714	1	0.869847	0.0605572	ENSG00000119953
TRMT10C	0.22078	0.376819	0.846	0.857	1	0.871375	0.0597947	ENSG00000174173
ACTN1	0.22089	0.819906	1	1	1	0.871525	0.0597203	ENSG00000072110
CTNNA1	0.222198	0.42784	1	0.857	1	0.873513	0.0587308	ENSG00000044115
IST1	0.222456	0.612848	1	0.857	1	0.873681	0.0586473	ENSG00000182149
PRDX6	0.222458	0.513362	0.923	1	1	0.873681	0.0586473	ENSG00000117592
STIP1	0.222542	0.110118	0.923	0.714	1	0.873681	0.0586473	ENSG00000168439
HNRNPC	0.222724	0.294409	1	1	1	0.874	0.0584884	ENSG00000092199
TPD52L2	0.222937	0.620528	0.923	0.857	1	0.874637	0.0581721	ENSG00000101150
AAR2	0.374385	0.571185	0.769	0.143	1	0.875258	0.0578637	ENSG00000131043
ABCA1	0.688963	0.548091	1	0.714	1	0.875258	0.0578637	ENSG00000165029
ABCA3	0.67461	0.0918672	0.769	0.286	1	0.875258	0.0578637	ENSG00000167972
ABCC1	0.26769	0.126857	0.923	0.571	1	0.875258	0.0578637	ENSG00000278183
ABCC1	0.26769	0.126857	0.923	0.571	1	0.875258	0.0578637	ENSG00000103222
ABCC4	0.327242	0.629724	0.769	0.286	1	0.875258	0.0578637	ENSG00000125257
ABCF3	0.621069	0.580829	0.846	0.429	1	0.875258	0.0578637	ENSG00000161204
ABCG2	0.602108	0.0565121	0.769	0.429	1	0.875258	0.0578637	ENSG00000118777
ABHD17B	0.67842	0.250811	0.923	0.571	1	0.875258	0.0578637	ENSG00000107362
ABHD17C	0.490206	1.04027	0.846	0.286	1	0.875258	0.0578637	ENSG00000136379
ABHD5	0.52348	0.779855	0.923	0.714	1	0.875258	0.0578637	ENSG00000011198
ABI1	0.511973	0.305759	0.923	0.857	1	0.875258	0.0578637	ENSG00000136754
ABT1	0.542167	0.170087	0.923	0.714	1	0.875258	0.0578637	ENSG00000292169
ABT1	0.542167	0.170087	0.923	0.714	1	0.875258	0.0578637	ENSG00000146109
ACAA2	0.246495	1.13972	0.923	0.429	1	0.875258	0.0578637	ENSG00000167315
ACACA	0.271702	0.506255	0.692	0.143	1	0.875258	0.0578637	ENSG00000278540
ACACA	0.271702	0.506255	0.692	0.143	1	0.875258	0.0578637	ENSG00000275176
ACAD8	0.62476	0.195059	0.769	0.286	1	0.875258	0.0578637	ENSG00000151498
ACKR3	0.682595	0.103417	0.462	0.143	1	0.875258	0.0578637	ENSG00000144476
ACOT9	0.496783	0.0704308	0.846	0.714	1	0.875258	0.0578637	ENSG00000123130
ACP2	0.31597	0.028409	0.846	0.571	1	0.875258	0.0578637	ENSG00000134575
ACSL4	0.379623	0.429428	0.846	0.571	1	0.875258	0.0578637	ENSG00000068366
ACSL6	0.66403	0.127457	0.154	0	1	0.875258	0.0578637	ENSG00000164398
ACSS3	0.623874	0.115356	0.077	0	1	0.875258	0.0578637	ENSG00000111058
ACTG1	0.394109	0.364514	1	1	1	0.875258	0.0578637	ENSG00000291420
ACTG1	0.394109	0.364514	1	1	1	0.875258	0.0578637	ENSG00000184009
ACTL6A	0.695021	0.00435513	0.846	0.286	1	0.875258	0.0578637	ENSG00000136518
ACYP1	0.416435	0.422236	0.846	0.429	1	0.875258	0.0578637	ENSG00000119640
ADAM10	0.617307	0.530953	1	0.571	1	0.875258	0.0578637	ENSG00000137845
ADAM9	0.522444	0.141927	1	0.857	1	0.875258	0.0578637	ENSG00000168615
ADAM9	0.522444	0.141927	1	0.857	1	0.875258	0.0578637	ENSG00000282230
ADAMTS1	0.483897	0.556962	1	0.857	1	0.875258	0.0578637	ENSG00000154734
ADAMTS10	0.662381	0.468567	0.692	0.286	1	0.875258	0.0578637	ENSG00000142303
ADAMTS2	0.393489	0.0728914	0.538	0.143	1	0.875258	0.0578637	ENSG00000087116
ADAMTS5	0.482136	0.163954	0.769	0.429	1	0.875258	0.0578637	ENSG00000154736
ADAMTSL4	0.488009	0.338955	0.923	0.429	1	0.875258	0.0578637	ENSG00000143382
ADAT2	0.700908	0.332217	0.692	0.286	1	0.875258	0.0578637	ENSG00000189007
ADD1	0.574515	0.123811	0.923	0.571	1	0.875258	0.0578637	ENSG00000087274
ADGRF5	0.307163	0.091587	1	0.714	1	0.875258	0.0578637	ENSG00000069122
ADRB1	0.623874	0.115356	0.077	0	1	0.875258	0.0578637	ENSG00000043591
ADRM1	0.273566	0.519281	0.923	0.857	1	0.875258	0.0578637	ENSG00000130706
AFAP1L1	0.663479	0.150554	0.769	0.714	1	0.875258	0.0578637	ENSG00000157510
AFF4	0.368508	0.401373	1	1	1	0.875258	0.0578637	ENSG00000072364
AGTPBP1	0.555138	0.276537	0.923	0.571	1	0.875258	0.0578637	ENSG00000135049
AGTR1	0.623874	0.115356	0.077	0	1	0.875258	0.0578637	ENSG00000144891
AHCTF1	0.409546	0.247532	0.923	1	1	0.875258	0.0578637	ENSG00000153207
AHR	0.608746	0.0143344	0.923	1	1	0.875258	0.0578637	ENSG00000106546
AIP	0.469818	0.118278	0.923	0.429	1	0.875258	0.0578637	ENSG00000110711
AK1	0.380315	0.123591	1	0.714	1	0.875258	0.0578637	ENSG00000106992
AKAP12	0.287948	0.482975	0.923	1	1	0.875258	0.0578637	ENSG00000131016
AKIRIN1	0.329538	0.332744	0.923	1	1	0.875258	0.0578637	ENSG00000174574
AKT2	0.240436	0.699129	1	0.571	1	0.875258	0.0578637	ENSG00000105221
ALDOA	0.329761	0.360018	1	1	1	0.875258	0.0578637	ENSG00000149925
ALG3	0.486667	0.208976	0.846	0.429	1	0.875258	0.0578637	ENSG00000214160
ALKBH4	0.357931	0.101998	0.769	0.286	1	0.875258	0.0578637	ENSG00000160993
ALKBH6	0.380706	0.0904652	0.692	0.286	1	0.875258	0.0578637	ENSG00000239382
ALKBH7	0.565406	0.111351	0.846	0.571	1	0.875258	0.0578637	ENSG00000125652
ALMS1	0.349697	0.908902	0.923	0.286	1	0.875258	0.0578637	ENSG00000116127
ALX1	0.623874	0.115356	0.077	0	1	0.875258	0.0578637	ENSG00000180318
AMBRA1	0.309577	0.491636	0.769	0.286	1	0.875258	0.0578637	ENSG00000110497
AMOTL1	0.318877	1.12538	1	0.571	1	0.875258	0.0578637	ENSG00000166025
AMPD2	0.263296	0.266595	0.769	0.429	1	0.875258	0.0578637	ENSG00000116337
ANGPTL1	0.671309	0.129492	0.154	0	1	0.875258	0.0578637	ENSG00000116194
ANGPTL4	0.237763	0.892859	1	0.857	1	0.875258	0.0578637	ENSG00000167772
ANK2	0.601524	0.585299	0.769	0.286	1	0.875258	0.0578637	ENSG00000145362
ANKH	0.576368	0.22054	0.923	0.714	1	0.875258	0.0578637	ENSG00000154122
ANKRD12	0.433109	0.336475	1	1	1	0.875258	0.0578637	ENSG00000101745
ANKRD33B	0.623874	0.115356	0.077	0	1	0.875258	0.0578637	ENSG00000164236
ANKRD37	0.377735	0.341249	0.692	0.286	1	0.875258	0.0578637	ENSG00000186352
ANKRD9	0.699373	0.014829	0.769	0.714	1	0.875258	0.0578637	ENSG00000156381
ANXA11	0.32657	0.567723	0.923	0.857	1	0.875258	0.0578637	ENSG00000122359
ANXA6	0.41914	4.67581e-05	0.846	0.857	1	0.875258	0.0578637	ENSG00000197043
AP1AR	0.237828	0.867631	0.923	0.429	1	0.875258	0.0578637	ENSG00000138660
AP1G1	0.22471	0.117154	1	0.857	1	0.875258	0.0578637	ENSG00000166747
AP1M1	0.429172	0.818646	1	0.429	1	0.875258	0.0578637	ENSG00000072958
AP3M2	0.422458	0.395234	0.846	0.714	1	0.875258	0.0578637	ENSG00000070718
APBB1	0.540575	0.0577189	0.615	0.286	1	0.875258	0.0578637	ENSG00000166313
APH1A	0.382463	0.812563	1	0.714	1	0.875258	0.0578637	ENSG00000117362
APLN	0.387344	0.899844	0.692	0.143	1	0.875258	0.0578637	ENSG00000171388
APOO	0.518511	0.129552	0.615	0.143	1	0.875258	0.0578637	ENSG00000184831
APPL1	0.628653	0.0377179	0.923	0.714	1	0.875258	0.0578637	ENSG00000157500
APPL2	0.586014	0.832901	0.923	0.429	1	0.875258	0.0578637	ENSG00000136044
ARAF	0.347471	0.12881	0.923	0.857	1	0.875258	0.0578637	ENSG00000078061
ARC	0.358177	0.397831	0.462	0	1	0.875258	0.0578637	ENSG00000198576
AREL1	0.696021	0.0546674	0.692	0.286	1	0.875258	0.0578637	ENSG00000119682
ARF3	0.342689	0.0833383	0.769	0.571	1	0.875258	0.0578637	ENSG00000134287
ARF4	0.391161	0.227729	0.923	1	1	0.875258	0.0578637	ENSG00000168374
ARF5	0.575869	0.130689	0.923	0.714	1	0.875258	0.0578637	ENSG00000004059
ARFGAP3	0.289197	0.978178	0.923	0.571	1	0.875258	0.0578637	ENSG00000242247
ARHGAP10	0.673071	0.508548	0.846	0.286	1	0.875258	0.0578637	ENSG00000071205
ARHGAP23	0.540965	0.443065	0.923	0.857	1	0.875258	0.0578637	ENSG00000273780
ARHGAP23	0.540965	0.443065	0.923	0.857	1	0.875258	0.0578637	ENSG00000275832
ARHGAP29	0.247267	0.486679	0.923	1	1	0.875258	0.0578637	ENSG00000137962
ARHGAP31	0.651786	0.479386	0.923	0.714	1	0.875258	0.0578637	ENSG00000031081
ARHGAP5	0.491911	0.353407	0.923	0.857	1	0.875258	0.0578637	ENSG00000100852
ARHGEF11	0.696005	0.205011	0.923	0.429	1	0.875258	0.0578637	ENSG00000132694
ARHGEF15	0.662215	0.10937	0.769	0.429	1	0.875258	0.0578637	ENSG00000198844
ARHGEF2	0.514851	0.50333	0.923	0.714	1	0.875258	0.0578637	ENSG00000116584
ARHGEF28	0.497373	0.149299	0.462	0.143	1	0.875258	0.0578637	ENSG00000214944
ARHGEF40	0.254638	0.483559	0.923	0.714	1	0.875258	0.0578637	ENSG00000165801
ARHGEF7	0.38528	0.0109811	1	0.857	1	0.875258	0.0578637	ENSG00000102606
ARID4B	0.365998	0.0627662	1	0.857	1	0.875258	0.0578637	ENSG00000054267
ARIH1	0.229228	0.240128	1	1	1	0.875258	0.0578637	ENSG00000166233
ARL15	0.42503	0.384364	0.769	0.286	1	0.875258	0.0578637	ENSG00000185305
ARL8A	0.227537	0.747093	1	0.714	1	0.875258	0.0578637	ENSG00000143862
ARL8B	0.454374	0.369994	0.846	0.714	1	0.875258	0.0578637	ENSG00000134108
ARMCX1	0.501969	0.319175	0.923	0.429	1	0.875258	0.0578637	ENSG00000126947
ARMCX2	0.522472	0.0532776	0.615	0.286	1	0.875258	0.0578637	ENSG00000184867
ARPC1B	0.560113	0.332838	0.923	0.714	1	0.875258	0.0578637	ENSG00000130429
ARVCF	0.531231	0.0958895	0.692	0.429	1	0.875258	0.0578637	ENSG00000099889
ASAP2	0.600629	0.178706	0.846	0.714	1	0.875258	0.0578637	ENSG00000151693
ASCC3	0.555479	0.0352891	0.846	0.571	1	0.875258	0.0578637	ENSG00000112249
ASMTL	0.628652	0.0589535	1	0.714	1	0.875258	0.0578637	ENSG00000292339
ASMTL	0.628652	0.0589535	1	0.714	1	0.875258	0.0578637	ENSG00000169093
ASS1	0.62784	0.110696	0.769	0.286	1	0.875258	0.0578637	ENSG00000130707
ATF2	0.454818	0.34168	0.923	0.714	1	0.875258	0.0578637	ENSG00000115966
ATG13	0.343807	0.396256	0.769	0.429	1	0.875258	0.0578637	ENSG00000175224
ATG14	0.256749	0.515943	0.846	0.429	1	0.875258	0.0578637	ENSG00000126775
ATG4C	0.624922	0.202844	0.692	0.286	1	0.875258	0.0578637	ENSG00000125703
ATL3	0.454803	0.127327	0.846	0.429	1	0.875258	0.0578637	ENSG00000184743
ATMIN	0.583446	0.684474	0.923	0.429	1	0.875258	0.0578637	ENSG00000291953
ATMIN	0.583446	0.684474	0.923	0.429	1	0.875258	0.0578637	ENSG00000166454
ATP11B	0.325431	0.144942	0.923	0.714	1	0.875258	0.0578637	ENSG00000058063
ATP1B1	0.615052	0.275221	0.923	0.714	1	0.875258	0.0578637	ENSG00000143153
ATP2A2	0.465531	0.0800851	1	1	1	0.875258	0.0578637	ENSG00000174437
ATP6AP2	0.354729	0.354611	0.923	0.571	1	0.875258	0.0578637	ENSG00000182220
ATP6V0A2	0.283395	0.595474	0.923	0.429	1	0.875258	0.0578637	ENSG00000185344
ATP6V0B	0.679019	0.221614	0.846	0.571	1	0.875258	0.0578637	ENSG00000117410
ATP6V1A	0.375931	0.776208	0.923	0.286	1	0.875258	0.0578637	ENSG00000114573
AUP1	0.64377	0.236127	1	0.857	1	0.875258	0.0578637	ENSG00000115307
AZU1	0.573537	0.0680508	0.538	0.286	1	0.875258	0.0578637	ENSG00000278624
AZU1	0.573537	0.0680508	0.538	0.286	1	0.875258	0.0578637	ENSG00000172232
B2M	0.557674	0.233441	1	1	1	0.875258	0.0578637	ENSG00000273686
B2M	0.557674	0.233441	1	1	1	0.875258	0.0578637	ENSG00000166710
B3GNT2	0.374562	0.746518	1	0.429	1	0.875258	0.0578637	ENSG00000170340
BAD	0.262825	0.862158	0.923	0.571	1	0.875258	0.0578637	ENSG00000002330
BAG1	0.517791	0.481884	0.923	0.857	1	0.875258	0.0578637	ENSG00000107262
BAMBI	0.544931	0.0283322	0.615	0	1	0.875258	0.0578637	ENSG00000095739
BAP1	0.52941	0.478646	0.923	0.714	1	0.875258	0.0578637	ENSG00000163930
BCAP31	0.483294	0.407792	1	0.857	1	0.875258	0.0578637	ENSG00000185825
BCAR3	0.445016	0.637329	0.846	0.571	1	0.875258	0.0578637	ENSG00000137936
BCAT1	0.670396	0.40388	0.692	0	1	0.875258	0.0578637	ENSG00000060982
BCL2L2	0.428581	0.792594	0.846	0.286	1	0.875258	0.0578637	ENSG00000129473
BCL6B	0.342506	0.225367	0.769	0.571	1	0.875258	0.0578637	ENSG00000161940
BCL9L	0.663188	0.602773	0.846	0.286	1	0.875258	0.0578637	ENSG00000186174
BCOR	0.623924	0.244797	0.769	0.429	1	0.875258	0.0578637	ENSG00000183337
BEND7	0.565765	0.00235775	0.846	0.429	1	0.875258	0.0578637	ENSG00000165626
BGN	0.547569	1.4932	0.692	0.143	1	0.875258	0.0578637	ENSG00000182492
BHLHE40	0.349144	0.204413	1	1	1	0.875258	0.0578637	ENSG00000134107
BICD2	0.269874	0.978362	0.846	0.286	1	0.875258	0.0578637	ENSG00000185963
BID	0.234608	0.357445	0.923	0.714	1	0.875258	0.0578637	ENSG00000015475
BIN3	0.285231	0.238391	0.923	0.857	1	0.875258	0.0578637	ENSG00000147439
BMP2	0.667243	0.0457656	1	1	1	0.875258	0.0578637	ENSG00000125845
BMPR1A	0.478768	0.124326	0.308	0.143	1	0.875258	0.0578637	ENSG00000107779
BMPR2	0.501017	0.455163	0.846	0.714	1	0.875258	0.0578637	ENSG00000204217
BNIP3	0.386624	0.316551	0.846	0.571	1	0.875258	0.0578637	ENSG00000176171
BOC	0.52839	0.139528	0.308	0.143	1	0.875258	0.0578637	ENSG00000144857
BOD1	0.626814	0.698841	0.923	0.571	1	0.875258	0.0578637	ENSG00000145919
BOD1L1	0.690966	0.401771	0.923	1	1	0.875258	0.0578637	ENSG00000038219
BOK	0.47828	0.10765	0.769	0.143	1	0.875258	0.0578637	ENSG00000176720
BRAF	0.666685	0.246421	0.846	0.571	1	0.875258	0.0578637	ENSG00000157764
BRCC3	0.68033	0.17183	0.923	0.286	1	0.875258	0.0578637	ENSG00000185515
BRK1	0.626938	0.663002	1	0.714	1	0.875258	0.0578637	ENSG00000254999
BRMS1	0.302006	0.216378	0.846	0.571	1	0.875258	0.0578637	ENSG00000174744
BRPF1	0.581793	0.153501	0.846	0.571	1	0.875258	0.0578637	ENSG00000156983
BSG	0.601742	0.291537	1	1	1	0.875258	0.0578637	ENSG00000172270
BST1	0.610862	0.195104	0.462	0	1	0.875258	0.0578637	ENSG00000109743
BTBD3	0.573972	0.0625909	0.846	0.571	1	0.875258	0.0578637	ENSG00000132640
BTBD9	0.249917	0.834973	0.846	0.429	1	0.875258	0.0578637	ENSG00000183826
BTF3	0.255921	0.179427	1	1	1	0.875258	0.0578637	ENSG00000145741
C11orf96	0.598353	0.0913345	1	1	1	0.875258	0.0578637	ENSG00000187479
C12orf75	0.624137	0.0536242	0.615	0.429	1	0.875258	0.0578637	ENSG00000235162
C16orf74	0.416733	0.331535	0.538	0	1	0.875258	0.0578637	ENSG00000154102
C1orf122	0.253113	1.1515	1	0.571	1	0.875258	0.0578637	ENSG00000197982
C1orf198	0.402723	0.0278786	0.923	0.429	1	0.875258	0.0578637	ENSG00000119280
C1orf35	0.603014	0.120883	0.923	0.571	1	0.875258	0.0578637	ENSG00000143793
C1RL	0.441878	0.0529501	0.615	0.286	1	0.875258	0.0578637	ENSG00000288124
C1RL	0.441878	0.0529501	0.615	0.286	1	0.875258	0.0578637	ENSG00000139178
C1S	0.501887	0.193983	0.538	0.286	1	0.875258	0.0578637	ENSG00000182326
C2CD2	0.591887	0.0902222	1	0.714	1	0.875258	0.0578637	ENSG00000157617
C3orf52	0.320012	0.607073	0.692	0.286	1	0.875258	0.0578637	ENSG00000114529
C8orf76	0.582565	0.142633	0.846	0.429	1	0.875258	0.0578637	ENSG00000189376
CA2	0.347107	0.8483	0.692	0.143	1	0.875258	0.0578637	ENSG00000104267
CACNA1C	0.405893	0.572354	0.846	0.571	1	0.875258	0.0578637	ENSG00000285479
CACNA1C	0.405893	0.572354	0.846	0.571	1	0.875258	0.0578637	ENSG00000151067
CACYBP	0.34006	0.0238931	1	0.714	1	0.875258	0.0578637	ENSG00000116161
CALD1	0.454575	0.970261	1	0.714	1	0.875258	0.0578637	ENSG00000122786
CALR	0.674441	0.311593	1	1	1	0.875258	0.0578637	ENSG00000179218
CAMK2D	0.68031	0.371652	1	0.857	1	0.875258	0.0578637	ENSG00000145349
CAMLG	0.258724	0.543764	0.846	0.714	1	0.875258	0.0578637	ENSG00000164615
CAMSAP2	0.557775	0.351582	0.846	0.714	1	0.875258	0.0578637	ENSG00000118200
CANT1	0.410558	0.374457	1	0.714	1	0.875258	0.0578637	ENSG00000171302
CANX	0.52062	0.0856625	0.923	0.857	1	0.875258	0.0578637	ENSG00000283777
CANX	0.52062	0.0856625	0.923	0.857	1	0.875258	0.0578637	ENSG00000127022
CAP1	0.681294	0.0169567	0.923	1	1	0.875258	0.0578637	ENSG00000131236
CAPN7	0.618557	0.116303	0.846	0.571	1	0.875258	0.0578637	ENSG00000131375
CAPZA2	0.280602	0.579452	1	0.857	1	0.875258	0.0578637	ENSG00000198898
CARD16	0.534295	0.0641054	0.769	0.429	1	0.875258	0.0578637	ENSG00000204397
CARD19	0.570464	0.0940616	0.923	0.714	1	0.875258	0.0578637	ENSG00000165233
CASP7	0.687315	1.14325	1	0.429	1	0.875258	0.0578637	ENSG00000165806
CAST	0.599291	0.197377	1	1	1	0.875258	0.0578637	ENSG00000153113
CAV1	0.244258	0.815459	1	0.714	1	0.875258	0.0578637	ENSG00000105974
CBLB	0.641765	0.433402	0.923	0.857	1	0.875258	0.0578637	ENSG00000114423
CBR1	0.311625	0.0275877	0.385	0.429	1	0.875258	0.0578637	ENSG00000159228
CBX3	0.506614	0.249894	1	0.857	1	0.875258	0.0578637	ENSG00000122565
CCAR2	0.655922	0.130324	1	0.571	1	0.875258	0.0578637	ENSG00000158941
CCDC124	0.632926	0.1679	0.923	0.571	1	0.875258	0.0578637	ENSG00000007080
CCDC137	0.661627	0.553888	0.923	0.429	1	0.875258	0.0578637	ENSG00000185298
CCDC174	0.592298	0.0443911	0.769	0.571	1	0.875258	0.0578637	ENSG00000154781
CCDC191	0.569162	0.161519	0.846	0.714	1	0.875258	0.0578637	ENSG00000163617
CCDC57	0.701569	0.134504	0.769	0.286	1	0.875258	0.0578637	ENSG00000176155
CCDC8	0.623874	0.115356	0.077	0	1	0.875258	0.0578637	ENSG00000169515
CCDC82	0.273541	0.783022	0.923	0.571	1	0.875258	0.0578637	ENSG00000149231
CCDC85B	0.464851	0.212535	1	1	1	0.875258	0.0578637	ENSG00000175602
CCDC85C	0.520641	0.0391434	0.846	0.429	1	0.875258	0.0578637	ENSG00000205476
CCL2	0.232422	0.34921	0.692	0.714	1	0.875258	0.0578637	ENSG00000108691
CCL8	0.451709	0.736401	0.692	0.286	1	0.875258	0.0578637	ENSG00000108700
CCNC	0.337653	0.462521	0.923	0.714	1	0.875258	0.0578637	ENSG00000112237
CCND2	0.626105	0.190555	0.385	0.143	1	0.875258	0.0578637	ENSG00000118971
CCNL2	0.378947	0.20954	1	0.857	1	0.875258	0.0578637	ENSG00000221978
CCNT2	0.443718	0.820956	1	0.571	1	0.875258	0.0578637	ENSG00000082258
CCRL2	0.592563	0.227342	0.769	0.571	1	0.875258	0.0578637	ENSG00000121797
CCT3	0.570913	0.817077	1	0.571	1	0.875258	0.0578637	ENSG00000163468
CCT5	0.540671	0.604404	0.923	0.571	1	0.875258	0.0578637	ENSG00000150753
CCT6A	0.613378	0.668121	0.923	0.571	1	0.875258	0.0578637	ENSG00000146731
CCT7	0.676204	0.0308737	0.923	0.571	1	0.875258	0.0578637	ENSG00000135624
CCT8	0.622886	0.267507	0.923	0.571	1	0.875258	0.0578637	ENSG00000291533
CCT8	0.622886	0.267507	0.923	0.571	1	0.875258	0.0578637	ENSG00000156261
CD151	0.431757	0.288967	1	0.857	1	0.875258	0.0578637	ENSG00000177697
CD248	0.63495	0.183021	0.308	0.143	1	0.875258	0.0578637	ENSG00000174807
CD2AP	0.28217	0.513035	0.923	0.857	1	0.875258	0.0578637	ENSG00000198087
CD33	0.535106	0.116706	0.462	0.143	1	0.875258	0.0578637	ENSG00000105383
CD99	0.427457	0.389689	1	1	1	0.875258	0.0578637	ENSG00000292348
CD99	0.427457	0.389689	1	1	1	0.875258	0.0578637	ENSG00000002586
CDAN1	0.618367	0.3796	0.692	0.286	1	0.875258	0.0578637	ENSG00000140326
CDC123	0.606399	0.382749	0.846	0.571	1	0.875258	0.0578637	ENSG00000151465
CDC42EP1	0.637893	0.905612	1	0.429	1	0.875258	0.0578637	ENSG00000128283
CDC42EP4	0.364068	0.504201	1	1	1	0.875258	0.0578637	ENSG00000179604
CDC42EP5	0.582742	0.192364	0.846	0.714	1	0.875258	0.0578637	ENSG00000273633
CDC42EP5	0.582742	0.192364	0.846	0.714	1	0.875258	0.0578637	ENSG00000273622
CDC42EP5	0.582742	0.192364	0.846	0.714	1	0.875258	0.0578637	ENSG00000278444
CDC42EP5	0.582742	0.192364	0.846	0.714	1	0.875258	0.0578637	ENSG00000167617
CDIP1	0.58144	0.619483	0.692	0.286	1	0.875258	0.0578637	ENSG00000089486
CDIP1	0.58144	0.619483	0.692	0.286	1	0.875258	0.0578637	ENSG00000274336
CDK11A	0.338728	0.183423	0.923	1	1	0.875258	0.0578637	ENSG00000008128
CDK11B	0.51769	0.38867	0.923	0.714	1	0.875258	0.0578637	ENSG00000248333
CDK12	0.67538	0.271497	1	0.857	1	0.875258	0.0578637	ENSG00000167258
CDK4	0.554129	0.755562	0.923	0.429	1	0.875258	0.0578637	ENSG00000135446
CDKN1C	0.319754	0.135231	1	0.714	1	0.875258	0.0578637	ENSG00000273707
CDKN1C	0.319754	0.135231	1	0.714	1	0.875258	0.0578637	ENSG00000129757
CDKN2AIPNL	0.328752	0.403157	0.769	0.286	1	0.875258	0.0578637	ENSG00000237190
CDKN2B	0.514665	0.149765	0.538	0.143	1	0.875258	0.0578637	ENSG00000147883
CEACAM19	0.63694	0.111662	0.615	0.286	1	0.875258	0.0578637	ENSG00000186567
CELF4	0.517796	0.200249	0.692	0.286	1	0.875258	0.0578637	ENSG00000101489
CENPB	0.576414	0.280944	0.769	0.571	1	0.875258	0.0578637	ENSG00000125817
CEP104	0.320962	0.0226861	0.692	0.286	1	0.875258	0.0578637	ENSG00000116198
CEP164	0.549175	0.154941	0.923	0.571	1	0.875258	0.0578637	ENSG00000110274
CEP170B	0.332514	0.620645	0.923	0.429	1	0.875258	0.0578637	ENSG00000099814
CEP63	0.572218	0.0569515	0.846	0.429	1	0.875258	0.0578637	ENSG00000182923
CEP85L	0.22341	1.0277	1	0.429	1	0.875258	0.0578637	ENSG00000111860
CERK	0.503575	0.136725	0.846	0.571	1	0.875258	0.0578637	ENSG00000100422
CETN2	0.327498	0.372188	0.846	0.429	1	0.875258	0.0578637	ENSG00000147400
CETN2	0.327498	0.372188	0.846	0.429	1	0.875258	0.0578637	ENSG00000292191
CFAP221	0.696858	0.138883	0.231	0	1	0.875258	0.0578637	ENSG00000163075
CFAP45	0.372623	0.649717	0.923	0.143	1	0.875258	0.0578637	ENSG00000213085
CGGBP1	0.502057	0.189778	0.923	1	1	0.875258	0.0578637	ENSG00000163320
CH25H	0.678004	0.194151	0.308	0	1	0.875258	0.0578637	ENSG00000138135
CHAC2	0.334823	0.0475354	0.385	0.286	1	0.875258	0.0578637	ENSG00000143942
CHCHD3	0.575715	0.877143	0.923	0.286	1	0.875258	0.0578637	ENSG00000106554
CHCHD4	0.6753	0.216769	0.462	0	1	0.875258	0.0578637	ENSG00000163528
CHD1L	0.583335	0.335881	0.692	0.286	1	0.875258	0.0578637	ENSG00000131778
CHD4	0.649935	0.665628	1	0.714	1	0.875258	0.0578637	ENSG00000111642
CHD6	0.452721	0.150241	1	0.857	1	0.875258	0.0578637	ENSG00000124177
CHERP	0.600421	0.118704	0.923	0.714	1	0.875258	0.0578637	ENSG00000085872
CHPF2	0.500713	0.332044	0.769	0.429	1	0.875258	0.0578637	ENSG00000033100
CHRDL1	0.569194	0.364847	0.385	0.286	1	0.875258	0.0578637	ENSG00000101938
CHST3	0.384936	0.23692	0.769	0.143	1	0.875258	0.0578637	ENSG00000122863
CHUK	0.633771	0.315395	0.769	0.429	1	0.875258	0.0578637	ENSG00000213341
CIAPIN1	0.467064	0.219387	0.769	0.429	1	0.875258	0.0578637	ENSG00000005194
CISD2	0.464348	0.113186	0.846	0.286	1	0.875258	0.0578637	ENSG00000145354
CITED4	0.347282	0.224944	0.923	0.714	1	0.875258	0.0578637	ENSG00000179862
CLDN11	0.64946	0.207955	0.462	0	1	0.875258	0.0578637	ENSG00000013297
CLINT1	0.403403	0.48414	1	1	1	0.875258	0.0578637	ENSG00000113282
CLOCK	0.553209	0.0305585	0.769	0.286	1	0.875258	0.0578637	ENSG00000134852
CLPP	0.634088	0.128377	0.923	0.571	1	0.875258	0.0578637	ENSG00000125656
CLPTM1	0.293445	0.728749	0.846	0.429	1	0.875258	0.0578637	ENSG00000104853
CLPTM1L	0.659008	0.247405	1	0.714	1	0.875258	0.0578637	ENSG00000274811
CLPTM1L	0.659008	0.247405	1	0.714	1	0.875258	0.0578637	ENSG00000049656
CMIP	0.64299	0.455428	0.923	0.857	1	0.875258	0.0578637	ENSG00000153815
CMSS1	0.437896	0.899441	0.769	0.286	1	0.875258	0.0578637	ENSG00000184220
CMTM8	0.523371	0.36048	0.769	0.429	1	0.875258	0.0578637	ENSG00000170293
CMYA5	0.642822	0.18311	0.308	0	1	0.875258	0.0578637	ENSG00000164309
CNEP1R1	0.65677	0.164601	0.846	0.429	1	0.875258	0.0578637	ENSG00000205423
CNIH1	0.597473	0.438041	0.923	0.714	1	0.875258	0.0578637	ENSG00000100528
CNIH4	0.295693	0.889042	0.923	0.571	1	0.875258	0.0578637	ENSG00000143771
CNN2	0.654828	0.510772	0.692	0.286	1	0.875258	0.0578637	ENSG00000064666
CNOT2	0.335625	0.230458	1	1	1	0.875258	0.0578637	ENSG00000111596
CNOT4	0.348203	0.0290586	0.846	0.857	1	0.875258	0.0578637	ENSG00000080802
CNPY2	0.535486	0.138473	1	0.857	1	0.875258	0.0578637	ENSG00000257727
CNRIP1	0.51536	0.43669	0.846	0.429	1	0.875258	0.0578637	ENSG00000119865
COA3	0.519866	0.300982	0.923	0.571	1	0.875258	0.0578637	ENSG00000183978
COG5	0.353851	0.285294	0.846	0.571	1	0.875258	0.0578637	ENSG00000284369
COG5	0.353851	0.285294	0.846	0.571	1	0.875258	0.0578637	ENSG00000164597
COIL	0.697657	0.257414	0.923	0.571	1	0.875258	0.0578637	ENSG00000121058
COL12A1	0.571075	0.0510418	0.077	0.143	1	0.875258	0.0578637	ENSG00000111799
COL18A1	0.430471	0.280153	0.923	0.571	1	0.875258	0.0578637	ENSG00000182871
COL6A3	0.660895	1.45373	0.538	0.143	1	0.875258	0.0578637	ENSG00000163359
COL8A2	0.623874	0.115356	0.077	0	1	0.875258	0.0578637	ENSG00000171812
COMMD1	0.62919	0.484711	0.923	0.571	1	0.875258	0.0578637	ENSG00000173163
COMMD9	0.454568	0.282682	0.769	0.571	1	0.875258	0.0578637	ENSG00000110442
COMTD1	0.557321	0.26997	0.769	0.286	1	0.875258	0.0578637	ENSG00000165644
COPB1	0.426782	0.0068972	0.846	0.571	1	0.875258	0.0578637	ENSG00000129083
COPG1	0.225217	0.599395	0.846	0.143	1	0.875258	0.0578637	ENSG00000181789
COPS7A	0.632429	0.128224	0.846	0.286	1	0.875258	0.0578637	ENSG00000111652
COPZ2	0.703117	0.457001	0.846	0.286	1	0.875258	0.0578637	ENSG00000005243
COX18	0.492314	0.12358	0.692	0.429	1	0.875258	0.0578637	ENSG00000163626
COX20	0.488673	0.136184	0.923	0.857	1	0.875258	0.0578637	ENSG00000203667
COX4I2	0.653184	0.124099	0.154	0	1	0.875258	0.0578637	ENSG00000131055
COX5A	0.332039	0.280497	0.923	0.714	1	0.875258	0.0578637	ENSG00000178741
COX7A2L	0.666628	0.240256	0.769	0.714	1	0.875258	0.0578637	ENSG00000115944
COX8A	0.703336	0.298643	1	1	1	0.875258	0.0578637	ENSG00000176340
CP	0.298716	2.13599	0.385	0.286	1	0.875258	0.0578637	ENSG00000047457
CPD	0.682882	0.501744	0.846	0.429	1	0.875258	0.0578637	ENSG00000108582
CPSF4	0.590892	0.395039	0.846	0.143	1	0.875258	0.0578637	ENSG00000160917
CPXM1	0.365234	0.0193346	0.385	0.286	1	0.875258	0.0578637	ENSG00000088882
CRH	0.268761	2.31307	0.308	0.143	1	0.875258	0.0578637	ENSG00000147571
CRISPLD1	0.455639	0.0576987	0.385	0.143	1	0.875258	0.0578637	ENSG00000121005
CRTAC1	0.623948	0.358781	0.538	0.286	1	0.875258	0.0578637	ENSG00000095713
CSF1	0.32613	0.237642	1	0.857	1	0.875258	0.0578637	ENSG00000184371
CSGALNACT2	0.618801	0.231116	0.769	0.571	1	0.875258	0.0578637	ENSG00000169826
CSNK1A1	0.574975	0.0288424	1	1	1	0.875258	0.0578637	ENSG00000113712
CSNK1D	0.415387	0.152716	0.923	1	1	0.875258	0.0578637	ENSG00000141551
CSNK2A1	0.478716	0.600757	1	0.714	1	0.875258	0.0578637	ENSG00000101266
CSNK2B	0.289672	0.332045	0.846	0.714	1	0.875258	0.0578637	ENSG00000204435
CSNK2B	0.289672	0.332045	0.846	0.714	1	0.875258	0.0578637	ENSG00000232960
CSNK2B	0.289672	0.332045	0.846	0.714	1	0.875258	0.0578637	ENSG00000224774
CSNK2B	0.289672	0.332045	0.846	0.714	1	0.875258	0.0578637	ENSG00000230700
CSNK2B	0.289672	0.332045	0.846	0.714	1	0.875258	0.0578637	ENSG00000228875
CSNK2B	0.289672	0.332045	0.846	0.714	1	0.875258	0.0578637	ENSG00000206406
CSNK2B	0.289672	0.332045	0.846	0.714	1	0.875258	0.0578637	ENSG00000224398
CTNNBL1	0.700731	0.0339016	0.769	0.429	1	0.875258	0.0578637	ENSG00000132792
CTSC	0.59564	0.0687678	0.846	0.714	1	0.875258	0.0578637	ENSG00000109861
CTSL	0.387317	0.468608	1	1	1	0.875258	0.0578637	ENSG00000135047
CTSZ	0.302747	0.000485555	0.846	0.429	1	0.875258	0.0578637	ENSG00000101160
CTTN	0.466048	0.431809	0.923	0.857	1	0.875258	0.0578637	ENSG00000288401
CTTN	0.466048	0.431809	0.923	0.857	1	0.875258	0.0578637	ENSG00000085733
CTU2	0.408532	0.502489	0.846	0.429	1	0.875258	0.0578637	ENSG00000174177
CUL5	0.453446	0.0434688	0.846	0.714	1	0.875258	0.0578637	ENSG00000166266
CWF19L2	0.269348	0.123049	1	0.571	1	0.875258	0.0578637	ENSG00000152404
CYLD	0.474462	0.12035	0.923	0.857	1	0.875258	0.0578637	ENSG00000083799
DAP	0.393378	0.463551	0.846	0.571	1	0.875258	0.0578637	ENSG00000112977
DAXX	0.594716	0.169681	0.846	0.571	1	0.875258	0.0578637	ENSG00000229396
DAXX	0.594716	0.169681	0.846	0.571	1	0.875258	0.0578637	ENSG00000227046
DAXX	0.594716	0.169681	0.846	0.571	1	0.875258	0.0578637	ENSG00000206206
DAXX	0.594716	0.169681	0.846	0.571	1	0.875258	0.0578637	ENSG00000231617
DAXX	0.594716	0.169681	0.846	0.571	1	0.875258	0.0578637	ENSG00000206279
DAXX	0.594716	0.169681	0.846	0.571	1	0.875258	0.0578637	ENSG00000204209
DCAF15	0.366601	0.176491	0.923	0.714	1	0.875258	0.0578637	ENSG00000288453
DCAF15	0.366601	0.176491	0.923	0.714	1	0.875258	0.0578637	ENSG00000132017
DCAF16	0.25991	0.740286	0.846	0.286	1	0.875258	0.0578637	ENSG00000163257
DCAF17	0.414049	0.338017	0.538	0.429	1	0.875258	0.0578637	ENSG00000115827
DCP2	0.694999	0.223921	1	0.857	1	0.875258	0.0578637	ENSG00000172795
DCTN1	0.295095	0.414766	0.769	0.429	1	0.875258	0.0578637	ENSG00000204843
DCTN2	0.549124	0.735971	1	0.714	1	0.875258	0.0578637	ENSG00000175203
DCTN4	0.247505	0.312742	0.769	0.571	1	0.875258	0.0578637	ENSG00000132912
DCTN5	0.259293	0.531831	0.923	0.571	1	0.875258	0.0578637	ENSG00000166847
DCTN6	0.285823	1.08938	0.923	0.429	1	0.875258	0.0578637	ENSG00000104671
DCXR	0.685289	0.415974	0.846	0.571	1	0.875258	0.0578637	ENSG00000169738
DDB2	0.682774	0.142428	0.769	0.429	1	0.875258	0.0578637	ENSG00000134574
DDHD1	0.5761	0.546224	0.769	0.429	1	0.875258	0.0578637	ENSG00000100523
DDX27	0.331464	0.265432	0.769	0.714	1	0.875258	0.0578637	ENSG00000124228
DDX5	0.664945	0.233039	1	1	1	0.875258	0.0578637	ENSG00000108654
DDX52	0.273661	0.738008	0.923	0.571	1	0.875258	0.0578637	ENSG00000277594
DDX52	0.273661	0.738008	0.923	0.571	1	0.875258	0.0578637	ENSG00000278053
DDX54	0.541828	0.560776	0.846	0.429	1	0.875258	0.0578637	ENSG00000123064
DDX59	0.258234	0.469441	0.846	0.571	1	0.875258	0.0578637	ENSG00000118197
DDX6	0.533898	0.379665	1	1	1	0.875258	0.0578637	ENSG00000110367
DEF8	0.287317	0.345767	0.923	0.571	1	0.875258	0.0578637	ENSG00000140995
DEGS1	0.677841	0.181094	1	0.857	1	0.875258	0.0578637	ENSG00000143753
DENND4A	0.321745	0.646476	0.923	0.571	1	0.875258	0.0578637	ENSG00000174485
DENND6A	0.498893	0.255604	0.923	0.571	1	0.875258	0.0578637	ENSG00000174839
DERL2	0.299667	0.299065	0.846	0.714	1	0.875258	0.0578637	ENSG00000072849
DFFA	0.603123	0.0524651	0.692	0.429	1	0.875258	0.0578637	ENSG00000160049
DGCR2	0.438323	0.0764923	0.846	0.571	1	0.875258	0.0578637	ENSG00000070413
DHRS3	0.326191	0.438855	0.923	0.571	1	0.875258	0.0578637	ENSG00000162496
DHRS7	0.626127	0.361713	0.923	0.571	1	0.875258	0.0578637	ENSG00000100612
DHX33	0.492572	0.461013	0.769	0.429	1	0.875258	0.0578637	ENSG00000005100
DHX35	0.274121	0.516757	0.846	0.286	1	0.875258	0.0578637	ENSG00000101452
DHX36	0.480678	0.470884	1	0.857	1	0.875258	0.0578637	ENSG00000174953
DHX36	0.480678	0.470884	1	0.857	1	0.875258	0.0578637	ENSG00000281763
DIXDC1	0.274014	0.738041	0.846	0.429	1	0.875258	0.0578637	ENSG00000150764
DMAP1	0.317584	1.07861	1	0.286	1	0.875258	0.0578637	ENSG00000178028
DMPK	0.676234	0.138494	0.846	0.571	1	0.875258	0.0578637	ENSG00000104936
DMWD	0.267091	0.538219	0.923	0.857	1	0.875258	0.0578637	ENSG00000185800
DNAJB11	0.294105	0.296936	1	0.857	1	0.875258	0.0578637	ENSG00000090520
DNAJB14	0.40563	0.667861	0.923	0.714	1	0.875258	0.0578637	ENSG00000164031
DNAJB5	0.616746	0.101561	0.923	0.571	1	0.875258	0.0578637	ENSG00000137094
DNAJB6	0.416989	0.235589	0.923	1	1	0.875258	0.0578637	ENSG00000105993
DNAJC21	0.373868	0.633708	0.846	0.571	1	0.875258	0.0578637	ENSG00000168724
DNAJC25	0.489245	0.197166	0.846	0.429	1	0.875258	0.0578637	ENSG00000059769
DNAJC5	0.595324	0.182593	0.846	0.714	1	0.875258	0.0578637	ENSG00000101152
DNAJC7	0.30051	0.309483	0.923	0.857	1	0.875258	0.0578637	ENSG00000168259
DNAJC8	0.539256	0.013063	1	1	1	0.875258	0.0578637	ENSG00000126698
DNALI1	0.34863	0.135816	0.615	0.286	1	0.875258	0.0578637	ENSG00000163879
DNLZ	0.672791	0.186756	0.692	0.286	1	0.875258	0.0578637	ENSG00000213221
DNMBP	0.293134	0.691049	0.923	0.429	1	0.875258	0.0578637	ENSG00000107554
DNPEP	0.516999	0.412941	0.923	0.714	1	0.875258	0.0578637	ENSG00000123992
DNTTIP1	0.589953	0.247798	0.769	0.429	1	0.875258	0.0578637	ENSG00000101457
DOC2B	0.350861	0.625118	0.846	0.571	1	0.875258	0.0578637	ENSG00000272670
DOC2B	0.350861	0.625118	0.846	0.571	1	0.875258	0.0578637	ENSG00000272636
DOCK5	0.437063	0.995667	0.923	0.429	1	0.875258	0.0578637	ENSG00000147459
DOCK7	0.647183	0.383711	0.769	0.286	1	0.875258	0.0578637	ENSG00000116641
DOHH	0.415236	0.453138	0.846	0.429	1	0.875258	0.0578637	ENSG00000129932
DPF2	0.672629	0.207411	0.923	0.571	1	0.875258	0.0578637	ENSG00000133884
DPH7	0.43447	0.267642	1	0.571	1	0.875258	0.0578637	ENSG00000148399
DPY19L4	0.351661	0.0478815	0.769	0.429	1	0.875258	0.0578637	ENSG00000156162
DPYD	0.323471	0.0586425	0.846	0.429	1	0.875258	0.0578637	ENSG00000188641
DRAM1	0.700381	0.407132	0.923	0.429	1	0.875258	0.0578637	ENSG00000136048
DSEL	0.252705	1.09141	0.846	0.429	1	0.875258	0.0578637	ENSG00000171451
DSEL	0.252705	1.09141	0.846	0.429	1	0.875258	0.0578637	ENSG00000262102
DUSP10	0.442414	0.319012	0.846	0.429	1	0.875258	0.0578637	ENSG00000143507
DUSP19	0.686506	0.482496	0.308	0.286	1	0.875258	0.0578637	ENSG00000162999
DUSP3	0.684876	0.562716	0.846	0.286	1	0.875258	0.0578637	ENSG00000108861
DUSP7	0.632271	0.752107	0.846	0.429	1	0.875258	0.0578637	ENSG00000164086
DYNC1LI2	0.235869	0.266878	0.923	0.857	1	0.875258	0.0578637	ENSG00000135720
DYNLL2	0.489066	0.268767	1	0.857	1	0.875258	0.0578637	ENSG00000264364
DYNLT1	0.665728	0.169953	0.846	0.857	1	0.875258	0.0578637	ENSG00000146425
DYRK2	0.251528	0.48292	0.846	0.429	1	0.875258	0.0578637	ENSG00000127334
EBF1	0.354183	0.982287	0.923	0.571	1	0.875258	0.0578637	ENSG00000164330
EBP	0.331955	0.429853	0.846	0.429	1	0.875258	0.0578637	ENSG00000147155
ECM2	0.67131	0.193823	0.308	0.143	1	0.875258	0.0578637	ENSG00000291357
ECM2	0.67131	0.193823	0.308	0.143	1	0.875258	0.0578637	ENSG00000106823
EED	0.340504	0.097414	1	0.714	1	0.875258	0.0578637	ENSG00000074266
EFEMP1	0.601455	0.0605249	0.154	0.143	1	0.875258	0.0578637	ENSG00000115380
EFNA5	0.623874	0.115356	0.077	0	1	0.875258	0.0578637	ENSG00000184349
EGFL8	0.625391	0.190022	0.385	0	1	0.875258	0.0578637	ENSG00000240389
EGFL8	0.625391	0.190022	0.385	0	1	0.875258	0.0578637	ENSG00000239974
EGFL8	0.625391	0.190022	0.385	0	1	0.875258	0.0578637	ENSG00000241404
EGFL8	0.625391	0.190022	0.385	0	1	0.875258	0.0578637	ENSG00000242038
EGFL8	0.625391	0.190022	0.385	0	1	0.875258	0.0578637	ENSG00000243897
EGFL8	0.625391	0.190022	0.385	0	1	0.875258	0.0578637	ENSG00000244444
EGFL8	0.625391	0.190022	0.385	0	1	0.875258	0.0578637	ENSG00000240592
EHD2	0.674606	0.205798	0.769	0.286	1	0.875258	0.0578637	ENSG00000024422
EID1	0.392891	0.888843	1	0.857	1	0.875258	0.0578637	ENSG00000255302
EID3	0.30229	0.742506	0.923	0.571	1	0.875258	0.0578637	ENSG00000255150
EIF1AD	0.329726	0.474362	0.769	0.286	1	0.875258	0.0578637	ENSG00000175376
EIF2AK4	0.632649	0.0320083	0.923	0.571	1	0.875258	0.0578637	ENSG00000128829
EIF2B2	0.639612	0.144184	0.846	0.714	1	0.875258	0.0578637	ENSG00000119718
EIF3D	0.609301	0.395731	1	0.857	1	0.875258	0.0578637	ENSG00000100353
EIF3F	0.622505	0.0943834	1	1	1	0.875258	0.0578637	ENSG00000175390
EIF4E	0.395487	0.326978	1	0.857	1	0.875258	0.0578637	ENSG00000151247
EIF4E2	0.27491	0.742267	1	0.714	1	0.875258	0.0578637	ENSG00000135930
EIF4EBP1	0.432041	0.363173	0.923	0.714	1	0.875258	0.0578637	ENSG00000187840
EIF4G1	0.255703	0.576553	1	0.857	1	0.875258	0.0578637	ENSG00000114867
EIF6	0.475608	0.494179	1	0.857	1	0.875258	0.0578637	ENSG00000242372
ELMO2	0.451824	0.530777	0.769	0.429	1	0.875258	0.0578637	ENSG00000062598
ELMOD3	0.395264	0.0852667	0.692	0.286	1	0.875258	0.0578637	ENSG00000115459
ELOVL5	0.411163	0.545372	1	0.714	1	0.875258	0.0578637	ENSG00000012660
ELP2	0.678504	0.287949	0.923	0.571	1	0.875258	0.0578637	ENSG00000134759
EMC7	0.534171	0.344511	0.923	0.714	1	0.875258	0.0578637	ENSG00000134153
EMD	0.599008	0.718751	1	0.571	1	0.875258	0.0578637	ENSG00000102119
EMP2	0.655411	0.331931	1	0.857	1	0.875258	0.0578637	ENSG00000213853
EMP3	0.269545	0.176435	1	0.857	1	0.875258	0.0578637	ENSG00000142227
ENDOD1	0.227543	0.709162	0.769	0.571	1	0.875258	0.0578637	ENSG00000149218
ENSA	0.359951	0.738808	0.923	0.571	1	0.875258	0.0578637	ENSG00000143420
EOGT	0.314785	0.465357	0.923	0.857	1	0.875258	0.0578637	ENSG00000163378
EPAS1	0.471118	0.0218347	1	1	1	0.875258	0.0578637	ENSG00000116016
EPDR1	0.477364	0.0646547	0.385	0.286	1	0.875258	0.0578637	ENSG00000086289
EPSTI1	0.436116	0.660196	0.769	0.286	1	0.875258	0.0578637	ENSG00000133106
ERC1	0.487773	0.224998	1	0.571	1	0.875258	0.0578637	ENSG00000082805
ERGIC3	0.518143	0.21173	0.923	0.714	1	0.875258	0.0578637	ENSG00000125991
ERLEC1	0.349051	0.776118	0.846	0.286	1	0.875258	0.0578637	ENSG00000068912
ERRFI1	0.259522	1.50778	0.846	0.429	1	0.875258	0.0578637	ENSG00000116285
ESPL1	0.297527	0.308789	0.692	0.143	1	0.875258	0.0578637	ENSG00000135476
ESRRA	0.635824	0.283051	0.846	0.429	1	0.875258	0.0578637	ENSG00000173153
ETFDH	0.415235	0.112757	0.846	0.571	1	0.875258	0.0578637	ENSG00000171503
ETS1	0.678411	0.00311545	1	1	1	0.875258	0.0578637	ENSG00000134954
ETS2	0.496973	0.320734	0.923	1	1	0.875258	0.0578637	ENSG00000157557
ETV5	0.655202	0.0979087	0.769	0.429	1	0.875258	0.0578637	ENSG00000244405
ETV6	0.5646	0.273667	0.923	0.857	1	0.875258	0.0578637	ENSG00000139083
EVA1C	0.350661	0.68489	0.923	0.571	1	0.875258	0.0578637	ENSG00000166979
EWSR1	0.255556	0.271622	1	1	1	0.875258	0.0578637	ENSG00000182944
EXOC3L2	0.310479	0.358851	0.923	0.857	1	0.875258	0.0578637	ENSG00000283632
EXOSC10	0.350894	0.448347	0.923	0.571	1	0.875258	0.0578637	ENSG00000171824
EXOSC5	0.617497	0.181802	0.692	0.143	1	0.875258	0.0578637	ENSG00000077348
EXOSC6	0.308216	0.478001	0.846	0.714	1	0.875258	0.0578637	ENSG00000223496
EXT1	0.667355	0.307502	0.923	0.714	1	0.875258	0.0578637	ENSG00000182197
EXTL2	0.314085	0.152994	0.769	0.571	1	0.875258	0.0578637	ENSG00000162694
F3	0.580367	0.0705354	0.769	0.143	1	0.875258	0.0578637	ENSG00000117525
F8A1	0.294718	0.0106475	0.846	0.571	1	0.875258	0.0578637	ENSG00000288722
FAM114A1	0.514155	0.210193	0.923	0.429	1	0.875258	0.0578637	ENSG00000197712
FAM118A	0.446063	0.46344	0.846	0.571	1	0.875258	0.0578637	ENSG00000100376
FAM13B	0.579543	0.18898	0.923	0.571	1	0.875258	0.0578637	ENSG00000031003
FAM171A1	0.581697	0.661814	0.769	0.286	1	0.875258	0.0578637	ENSG00000148468
FAM171B	0.509549	0.102072	0.692	0.429	1	0.875258	0.0578637	ENSG00000144369
FAM174A	0.438446	0.499648	0.769	0.429	1	0.875258	0.0578637	ENSG00000174132
FAM193A	0.582098	1.13442	0.923	0.429	1	0.875258	0.0578637	ENSG00000125386
FAM199X	0.642608	0.612739	1	0.429	1	0.875258	0.0578637	ENSG00000123575
FAM204A	0.432987	0.30142	0.923	0.857	1	0.875258	0.0578637	ENSG00000165669
FAM20C	0.537867	0.147485	0.308	0	1	0.875258	0.0578637	ENSG00000288499
FAM20C	0.537867	0.147485	0.308	0	1	0.875258	0.0578637	ENSG00000177706
FAM20C	0.537867	0.147485	0.308	0	1	0.875258	0.0578637	ENSG00000282147
FAM20C	0.537867	0.147485	0.308	0	1	0.875258	0.0578637	ENSG00000281429
FAM222B	0.459824	0.421521	0.846	0.429	1	0.875258	0.0578637	ENSG00000173065
FAM229B	0.666114	0.317856	0.846	0.286	1	0.875258	0.0578637	ENSG00000203778
FAM32A	0.384898	0.316675	0.923	0.714	1	0.875258	0.0578637	ENSG00000105058
FAM53B	0.299896	0.0525153	0.769	0.429	1	0.875258	0.0578637	ENSG00000189319
FAM78A	0.543584	0.136776	0.538	0.286	1	0.875258	0.0578637	ENSG00000126882
FAP	0.47834	0.29681	0.538	0	1	0.875258	0.0578637	ENSG00000078098
FARP2	0.438618	0.0478163	0.846	0.714	1	0.875258	0.0578637	ENSG00000006607
FARS2	0.316861	0.078607	0.846	0.429	1	0.875258	0.0578637	ENSG00000145982
FASTKD5	0.700243	0.0661391	0.846	0.571	1	0.875258	0.0578637	ENSG00000215251
FBXO21	0.437518	0.183874	0.923	0.571	1	0.875258	0.0578637	ENSG00000135108
FBXO22	0.4884	0.398997	0.846	0.143	1	0.875258	0.0578637	ENSG00000167196
FBXO30	0.476904	0.317459	0.692	0.143	1	0.875258	0.0578637	ENSG00000118496
FBXO5	0.36775	0.62439	0.846	0.286	1	0.875258	0.0578637	ENSG00000112029
FBXW7	0.348873	0.0246984	0.923	1	1	0.875258	0.0578637	ENSG00000109670
FEM1B	0.521693	0.315063	0.769	0.571	1	0.875258	0.0578637	ENSG00000169018
FERMT3	0.49098	0.353829	0.769	0.143	1	0.875258	0.0578637	ENSG00000149781
FGD5	0.616138	0.430997	0.923	0.571	1	0.875258	0.0578637	ENSG00000154783
FGD5-AS1	0.383553	0.0465946	1	0.714	1	0.875258	0.0578637	ENSG00000225733
FGD6	0.407833	0.0498089	0.846	0.571	1	0.875258	0.0578637	ENSG00000180263
FGFR1OP2	0.608344	0.635984	0.923	0.571	1	0.875258	0.0578637	ENSG00000111790
FHAD1	0.41964	0.0569587	0.769	0.143	1	0.875258	0.0578637	ENSG00000142621
FHL1	0.358365	0.412714	1	1	1	0.875258	0.0578637	ENSG00000022267
FIGN	0.623874	0.115356	0.077	0	1	0.875258	0.0578637	ENSG00000182263
FIP1L1	0.475423	0.458496	0.923	0.714	1	0.875258	0.0578637	ENSG00000145216
FKBP10	0.346977	1.02725	0.615	0.143	1	0.875258	0.0578637	ENSG00000141756
FKBP15	0.543952	0.0661745	0.846	0.571	1	0.875258	0.0578637	ENSG00000119321
FKBP4	0.360438	1.34432	0.923	0.286	1	0.875258	0.0578637	ENSG00000004478
FLCN	0.553847	0.0643993	0.846	0.429	1	0.875258	0.0578637	ENSG00000154803
FLII	0.354032	0.522208	0.923	0.571	1	0.875258	0.0578637	ENSG00000284571
FLII	0.354032	0.522208	0.923	0.571	1	0.875258	0.0578637	ENSG00000177731
FLNB	0.459519	0.731552	0.923	0.714	1	0.875258	0.0578637	ENSG00000136068
FLOT1	0.67404	0.136306	1	1	1	0.875258	0.0578637	ENSG00000223654
FLOT1	0.67404	0.136306	1	1	1	0.875258	0.0578637	ENSG00000137312
FLOT1	0.67404	0.136306	1	1	1	0.875258	0.0578637	ENSG00000236271
FLOT1	0.67404	0.136306	1	1	1	0.875258	0.0578637	ENSG00000232280
FLOT1	0.67404	0.136306	1	1	1	0.875258	0.0578637	ENSG00000230143
FLOT1	0.67404	0.136306	1	1	1	0.875258	0.0578637	ENSG00000224740
FLOT1	0.67404	0.136306	1	1	1	0.875258	0.0578637	ENSG00000206480
FLOT1	0.67404	0.136306	1	1	1	0.875258	0.0578637	ENSG00000206379
FMNL2	0.446748	0.187777	0.923	0.857	1	0.875258	0.0578637	ENSG00000157827
FNDC4	0.536076	0.405625	0.923	0.571	1	0.875258	0.0578637	ENSG00000115226
FOSL2	0.330073	0.480474	1	0.857	1	0.875258	0.0578637	ENSG00000075426
FOXA1	0.623874	0.115356	0.077	0	1	0.875258	0.0578637	ENSG00000129514
FOXC1	0.624485	0.714068	1	0.714	1	0.875258	0.0578637	ENSG00000054598
FOXC2	0.667087	0.154038	0.538	0	1	0.875258	0.0578637	ENSG00000176692
FOXJ3	0.343043	0.276126	0.923	1	1	0.875258	0.0578637	ENSG00000198815
FOXK1	0.326678	0.589001	0.923	0.714	1	0.875258	0.0578637	ENSG00000164916
FOXN3	0.29062	0.085517	1	1	1	0.875258	0.0578637	ENSG00000053254
FOXRED1	0.595222	0.125152	0.692	0.429	1	0.875258	0.0578637	ENSG00000110074
FRG1	0.569657	0.0693743	0.923	0.714	1	0.875258	0.0578637	ENSG00000283153
FRG1	0.569657	0.0693743	0.923	0.714	1	0.875258	0.0578637	ENSG00000283630
FRG1	0.569657	0.0693743	0.923	0.714	1	0.875258	0.0578637	ENSG00000275145
FRG1	0.569657	0.0693743	0.923	0.714	1	0.875258	0.0578637	ENSG00000109536
FRMD3	0.636925	0.494692	0.923	0.571	1	0.875258	0.0578637	ENSG00000172159
FRMD4A	0.287369	0.650814	1	0.857	1	0.875258	0.0578637	ENSG00000151474
FRMD8	0.467584	0.166259	0.923	0.857	1	0.875258	0.0578637	ENSG00000126391
FSCN1	0.253217	0.418181	0.923	1	1	0.875258	0.0578637	ENSG00000075618
FSD1L	0.524486	0.139627	0.615	0.286	1	0.875258	0.0578637	ENSG00000106701
FST	0.697249	1.4587	0.308	0.286	1	0.875258	0.0578637	ENSG00000134363
FTSJ1	0.494527	0.30882	0.846	0.571	1	0.875258	0.0578637	ENSG00000068438
FUT4	0.504287	0.193186	0.615	0.429	1	0.875258	0.0578637	ENSG00000196371
FYCO1	0.409957	0.0989061	0.846	0.429	1	0.875258	0.0578637	ENSG00000163820
FYTTD1	0.359468	0.88512	1	0.571	1	0.875258	0.0578637	ENSG00000122068
FZD1	0.490624	0.621898	0.692	0.143	1	0.875258	0.0578637	ENSG00000157240
FZD7	0.671309	0.129492	0.154	0	1	0.875258	0.0578637	ENSG00000155760
G2E3	0.549293	0.327758	0.846	0.429	1	0.875258	0.0578637	ENSG00000092140
GAA	0.536119	0.0494761	0.846	0.429	1	0.875258	0.0578637	ENSG00000291507
GAA	0.536119	0.0494761	0.846	0.429	1	0.875258	0.0578637	ENSG00000171298
GABARAPL1	0.658381	0.102168	1	1	1	0.875258	0.0578637	ENSG00000139112
GABPB1-AS1	0.690071	0.541429	1	0.714	1	0.875258	0.0578637	ENSG00000244879
GADD45G	0.463065	0.21013	0.923	1	1	0.875258	0.0578637	ENSG00000130222
GAK	0.695668	0.412356	0.923	1	1	0.875258	0.0578637	ENSG00000178950
GAL	0.36017	0.521011	0.692	0.143	1	0.875258	0.0578637	ENSG00000069482
GAREM1	0.678634	0.193868	0.308	0	1	0.875258	0.0578637	ENSG00000141441
GAS2L1	0.700875	0.0332181	0.769	0.571	1	0.875258	0.0578637	ENSG00000185340
GATA2	0.378534	0.0359216	0.846	0.857	1	0.875258	0.0578637	ENSG00000179348
GATAD2B	0.320421	0.880235	1	0.429	1	0.875258	0.0578637	ENSG00000261992
GATAD2B	0.320421	0.880235	1	0.429	1	0.875258	0.0578637	ENSG00000143614
GBE1	0.58005	0.199944	0.923	0.714	1	0.875258	0.0578637	ENSG00000114480
GBF1	0.648191	0.521555	0.923	0.429	1	0.875258	0.0578637	ENSG00000107862
GBP4	0.566025	0.0219508	0.769	0.571	1	0.875258	0.0578637	ENSG00000162654
GCLM	0.661874	0.290299	0.923	0.571	1	0.875258	0.0578637	ENSG00000023909
GDAP1	0.611614	0.0603059	0.846	0.286	1	0.875258	0.0578637	ENSG00000104381
GFM1	0.416755	0.0237172	0.846	0.571	1	0.875258	0.0578637	ENSG00000168827
GGA1	0.693845	0.303753	0.923	0.857	1	0.875258	0.0578637	ENSG00000100083
GGNBP2	0.339628	0.745566	1	0.714	1	0.875258	0.0578637	ENSG00000275099
GGNBP2	0.339628	0.745566	1	0.714	1	0.875258	0.0578637	ENSG00000278311
GIMAP6	0.582492	0.175032	0.846	0.429	1	0.875258	0.0578637	ENSG00000133561
GIT1	0.341032	0.609259	0.846	0.714	1	0.875258	0.0578637	ENSG00000108262
GJC1	0.364156	0.853992	0.692	0.429	1	0.875258	0.0578637	ENSG00000182963
GLIPR2	0.262063	0.15906	0.846	0.571	1	0.875258	0.0578637	ENSG00000122694
GLIS2	0.476111	0.123618	0.308	0.143	1	0.875258	0.0578637	ENSG00000274636
GLIS2	0.476111	0.123618	0.308	0.143	1	0.875258	0.0578637	ENSG00000126603
GLRX	0.231212	0.454352	0.846	0.571	1	0.875258	0.0578637	ENSG00000173221
GLRX3	0.385687	0.157144	0.846	0.714	1	0.875258	0.0578637	ENSG00000108010
GLUD1	0.255188	0.714324	0.846	0.429	1	0.875258	0.0578637	ENSG00000148672
GMEB2	0.505826	0.664858	0.923	0.286	1	0.875258	0.0578637	ENSG00000101216
GMFB	0.342755	0.156511	0.846	0.429	1	0.875258	0.0578637	ENSG00000197045
GNAS	0.224703	0.341176	1	1	1	0.875258	0.0578637	ENSG00000087460
GNB1	0.3643	0.541436	1	0.857	1	0.875258	0.0578637	ENSG00000078369
GNG7	0.600178	0.217189	0.615	0.286	1	0.875258	0.0578637	ENSG00000176533
GNPDA1	0.62588	0.345341	0.692	0.286	1	0.875258	0.0578637	ENSG00000113552
GNPNAT1	0.503876	0.793872	0.846	0.429	1	0.875258	0.0578637	ENSG00000100522
GOLGA2	0.443947	1.19485	0.846	0.286	1	0.875258	0.0578637	ENSG00000167110
GOLGA4	0.291167	0.0147409	1	1	1	0.875258	0.0578637	ENSG00000144674
GOLGA7	0.694296	0.194981	0.846	0.571	1	0.875258	0.0578637	ENSG00000147533
GOLM1	0.391612	0.761908	0.923	0.429	1	0.875258	0.0578637	ENSG00000135052
GON4L	0.242721	0.0435171	0.923	0.571	1	0.875258	0.0578637	ENSG00000116580
GOT2	0.313619	0.381925	0.846	0.286	1	0.875258	0.0578637	ENSG00000125166
GPALPP1	0.558782	0.0951033	0.846	0.429	1	0.875258	0.0578637	ENSG00000133114
GPAT2	0.516363	0.320752	0.769	0.286	1	0.875258	0.0578637	ENSG00000186281
GPAT3	0.55982	0.267055	0.692	0.286	1	0.875258	0.0578637	ENSG00000138678
GPATCH1	0.353891	0.229687	0.538	0.286	1	0.875258	0.0578637	ENSG00000076650
GPM6B	0.592367	0.116807	0.385	0.429	1	0.875258	0.0578637	ENSG00000046653
GPN2	0.57596	0.563027	0.692	0.286	1	0.875258	0.0578637	ENSG00000142751
GPR153	0.673257	0.103585	0.154	0.143	1	0.875258	0.0578637	ENSG00000158292
GPR160	0.64311	0.0821402	0.769	0.286	1	0.875258	0.0578637	ENSG00000173890
GPR176	0.623874	0.115356	0.077	0	1	0.875258	0.0578637	ENSG00000166073
GPS2	0.251415	0.0366678	0.846	0.571	1	0.875258	0.0578637	ENSG00000288325
GPS2	0.251415	0.0366678	0.846	0.571	1	0.875258	0.0578637	ENSG00000132522
GPSM2	0.419614	0.761775	0.692	0.286	1	0.875258	0.0578637	ENSG00000121957
GPX8	0.636563	0.194361	0.538	0.286	1	0.875258	0.0578637	ENSG00000164294
GRAMD1B	0.59927	0.0597847	0.154	0.143	1	0.875258	0.0578637	ENSG00000023171
GRHPR	0.456196	0.136184	0.692	0.429	1	0.875258	0.0578637	ENSG00000137106
GRINA	0.603815	0.192593	1	0.857	1	0.875258	0.0578637	ENSG00000178719
GRSF1	0.332034	0.0972919	0.923	0.571	1	0.875258	0.0578637	ENSG00000132463
GSK3B	0.294284	0.545332	1	1	1	0.875258	0.0578637	ENSG00000082701
GSTP1	0.540143	0.547446	1	0.857	1	0.875258	0.0578637	ENSG00000084207
GSTT2B	0.513618	0.00985924	0.692	0.286	1	0.875258	0.0578637	ENSG00000133433
GSTT2B	0.513618	0.00985924	0.692	0.286	1	0.875258	0.0578637	ENSG00000278695
GTF3C1	0.362945	0.111565	1	0.714	1	0.875258	0.0578637	ENSG00000077235
GTF3C6	0.577102	0.491442	0.923	0.714	1	0.875258	0.0578637	ENSG00000155115
GTPBP6	0.526212	0.565333	0.846	0.571	1	0.875258	0.0578637	ENSG00000292358
GTPBP6	0.526212	0.565333	0.846	0.571	1	0.875258	0.0578637	ENSG00000178605
GUCY1A2	0.571075	0.0510418	0.077	0.143	1	0.875258	0.0578637	ENSG00000152402
GUSB	0.296293	0.472294	0.923	1	1	0.875258	0.0578637	ENSG00000169919
HACD3	0.653537	0.503559	0.846	0.571	1	0.875258	0.0578637	ENSG00000074696
HBS1L	0.294845	0.542359	0.846	0.714	1	0.875258	0.0578637	ENSG00000112339
HCFC1	0.289915	0.137639	0.923	0.714	1	0.875258	0.0578637	ENSG00000172534
HCFC1R1	0.565876	0.418619	0.846	0.429	1	0.875258	0.0578637	ENSG00000103145
HDAC3	0.608008	0.124661	0.846	0.571	1	0.875258	0.0578637	ENSG00000171720
HDAC4	0.700868	0.173461	0.846	0.571	1	0.875258	0.0578637	ENSG00000068024
HDX	0.635005	0.0320804	0.615	0.286	1	0.875258	0.0578637	ENSG00000165259
HECTD4	0.616467	0.0331391	0.769	0.571	1	0.875258	0.0578637	ENSG00000173064
HEY1	0.260427	1.17697	0.538	0	1	0.875258	0.0578637	ENSG00000164683
HIVEP1	0.554944	0.182852	0.769	0.429	1	0.875258	0.0578637	ENSG00000095951
HIVEP2	0.318758	0.18385	0.923	0.429	1	0.875258	0.0578637	ENSG00000010818
HIVEP3	0.429186	0.551604	0.769	0.429	1	0.875258	0.0578637	ENSG00000127124
HLA-A	0.425543	0.261428	1	1	1	0.875258	0.0578637	ENSG00000229215
HLA-A	0.425543	0.261428	1	1	1	0.875258	0.0578637	ENSG00000223980
HLA-A	0.425543	0.261428	1	1	1	0.875258	0.0578637	ENSG00000231834
HLA-A	0.425543	0.261428	1	1	1	0.875258	0.0578637	ENSG00000224320
HLA-A	0.425543	0.261428	1	1	1	0.875258	0.0578637	ENSG00000227715
HLA-A	0.425543	0.261428	1	1	1	0.875258	0.0578637	ENSG00000206505
HLA-A	0.425543	0.261428	1	1	1	0.875258	0.0578637	ENSG00000235657
HLA-A	0.425543	0.261428	1	1	1	0.875258	0.0578637	ENSG00000206503
HLA-B	0.542797	0.135673	1	1	1	0.875258	0.0578637	ENSG00000228964
HLA-B	0.542797	0.135673	1	1	1	0.875258	0.0578637	ENSG00000224608
HLA-B	0.542797	0.135673	1	1	1	0.875258	0.0578637	ENSG00000206450
HLA-B	0.542797	0.135673	1	1	1	0.875258	0.0578637	ENSG00000232126
HLA-B	0.542797	0.135673	1	1	1	0.875258	0.0578637	ENSG00000223532
HLA-B	0.542797	0.135673	1	1	1	0.875258	0.0578637	ENSG00000234745
HMCN1	0.524089	0.274978	0.615	0.571	1	0.875258	0.0578637	ENSG00000143341
HMGB1	0.535652	0.111321	1	1	1	0.875258	0.0578637	ENSG00000189403
HMGXB3	0.231321	1.15736	0.923	0.571	1	0.875258	0.0578637	ENSG00000113716
HNRNPM	0.470169	0.207152	1	1	1	0.875258	0.0578637	ENSG00000099783
HOMER3	0.658229	0.192472	1	0.857	1	0.875258	0.0578637	ENSG00000051128
HOXA9	0.613249	0.345098	0.692	0.143	1	0.875258	0.0578637	ENSG00000078399
HOXD1	0.637751	0.161553	0.692	0.286	1	0.875258	0.0578637	ENSG00000128645
HPCAL1	0.556705	0.665922	1	0.571	1	0.875258	0.0578637	ENSG00000115756
HSD11B1L	0.466664	0.433275	0.846	0.429	1	0.875258	0.0578637	ENSG00000167733
HSD17B10	0.561843	0.107549	0.923	0.714	1	0.875258	0.0578637	ENSG00000072506
HSPA12B	0.310832	0.834004	0.769	0.286	1	0.875258	0.0578637	ENSG00000132622
HSPA13	0.467837	0.639392	0.846	0.571	1	0.875258	0.0578637	ENSG00000155304
HSPA8	0.569181	0.00391558	0.923	0.857	1	0.875258	0.0578637	ENSG00000109971
HSPB2	0.623874	0.115356	0.077	0	1	0.875258	0.0578637	ENSG00000170276
HTRA1	0.514155	0.410684	0.846	0.571	1	0.875258	0.0578637	ENSG00000166033
HYLS1	0.565835	0.160831	0.462	0.286	1	0.875258	0.0578637	ENSG00000198331
ICE1	0.514385	0.409475	1	0.571	1	0.875258	0.0578637	ENSG00000164151
IER3	0.645136	0.173266	0.923	0.857	1	0.875258	0.0578637	ENSG00000235030
IER3	0.645136	0.173266	0.923	0.857	1	0.875258	0.0578637	ENSG00000137331
IER3	0.645136	0.173266	0.923	0.857	1	0.875258	0.0578637	ENSG00000230128
IER3	0.645136	0.173266	0.923	0.857	1	0.875258	0.0578637	ENSG00000237155
IER3	0.645136	0.173266	0.923	0.857	1	0.875258	0.0578637	ENSG00000227231
IER3	0.645136	0.173266	0.923	0.857	1	0.875258	0.0578637	ENSG00000206478
IER3IP1	0.610408	0.357215	0.923	0.571	1	0.875258	0.0578637	ENSG00000134049
IER5L	0.532118	0.722382	1	0.714	1	0.875258	0.0578637	ENSG00000188483
IFI35	0.49004	0.777229	0.769	0.286	1	0.875258	0.0578637	ENSG00000068079
IFI44L	0.580912	0.537003	0.923	0.714	1	0.875258	0.0578637	ENSG00000137959
IFITM1	0.359144	0.345594	0.923	1	1	0.875258	0.0578637	ENSG00000185885
IFITM3	0.402823	0.422154	1	1	1	0.875258	0.0578637	ENSG00000142089
IFNGR1	0.482379	0.567003	1	0.857	1	0.875258	0.0578637	ENSG00000027697
IFRD2	0.282252	0.71302	0.923	0.571	1	0.875258	0.0578637	ENSG00000214706
IFT122	0.302637	0.0124561	0.923	0.429	1	0.875258	0.0578637	ENSG00000163913
IGFBP2	0.644221	0.601307	0.923	0.571	1	0.875258	0.0578637	ENSG00000115457
IGFBP6	0.374122	0.648217	0.615	0	1	0.875258	0.0578637	ENSG00000167779
IGHG1	0.581207	0.123647	0.462	0	1	0.875258	0.0578637	ENSG00000277633
IGHG1	0.581207	0.123647	0.462	0	1	0.875258	0.0578637	ENSG00000211896
IKBIP	0.676972	0.371491	0.769	0.429	1	0.875258	0.0578637	ENSG00000166130
IKZF5	0.29919	0.058977	0.923	0.571	1	0.875258	0.0578637	ENSG00000095574
IL17RE	0.473588	0.0976987	0.385	0.143	1	0.875258	0.0578637	ENSG00000163701
IL1R1	0.527746	0.423464	1	0.857	1	0.875258	0.0578637	ENSG00000115594
IL1RL1	0.413139	0.449743	0.385	0	1	0.875258	0.0578637	ENSG00000115602
IL4R	0.618934	0.124991	0.923	0.857	1	0.875258	0.0578637	ENSG00000077238
IL6R	0.577069	0.141417	0.692	0.143	1	0.875258	0.0578637	ENSG00000160712
ILK	0.500391	0.211299	1	0.714	1	0.875258	0.0578637	ENSG00000166333
ILVBL	0.42504	0.266897	1	0.429	1	0.875258	0.0578637	ENSG00000105135
IMP4	0.493948	0.0700046	0.846	0.714	1	0.875258	0.0578637	ENSG00000136718
IMPA1	0.491929	0.186578	0.769	0.429	1	0.875258	0.0578637	ENSG00000133731
IMPDH2	0.675288	0.212796	0.846	0.429	1	0.875258	0.0578637	ENSG00000178035
INAFM1	0.339929	0.590424	0.923	0.571	1	0.875258	0.0578637	ENSG00000257704
INF2	0.665079	0.338762	0.923	0.714	1	0.875258	0.0578637	ENSG00000203485
ING2	0.358765	0.386185	0.769	0.429	1	0.875258	0.0578637	ENSG00000168556
INO80B	0.43079	0.201984	0.692	0.286	1	0.875258	0.0578637	ENSG00000115274
INO80D	0.690655	0.216136	0.846	0.571	1	0.875258	0.0578637	ENSG00000283510
INO80D	0.690655	0.216136	0.846	0.571	1	0.875258	0.0578637	ENSG00000114933
INPP1	0.545973	0.241876	0.846	0.714	1	0.875258	0.0578637	ENSG00000151689
IPO11	0.274115	0.813536	0.846	0.571	1	0.875258	0.0578637	ENSG00000086200
IQGAP1	0.703681	0.03476	1	1	1	0.875258	0.0578637	ENSG00000140575
IRF2BP1	0.649362	0.581676	0.923	0.286	1	0.875258	0.0578637	ENSG00000170604
IRF7	0.39293	0.782946	0.923	0.571	1	0.875258	0.0578637	ENSG00000276561
IRF7	0.39293	0.782946	0.923	0.571	1	0.875258	0.0578637	ENSG00000185507
IRX3	0.609643	1.26387	0.538	0.143	1	0.875258	0.0578637	ENSG00000177508
ISOC2	0.505103	0.841221	0.923	0.429	1	0.875258	0.0578637	ENSG00000063241
ITGA1	0.32015	0.165216	1	0.714	1	0.875258	0.0578637	ENSG00000213949
ITGB1BP1	0.535048	0.0461111	0.846	0.571	1	0.875258	0.0578637	ENSG00000119185
ITM2C	0.408874	0.286859	0.538	0.286	1	0.875258	0.0578637	ENSG00000135916
ITPK1	0.226366	0.179776	0.923	0.429	1	0.875258	0.0578637	ENSG00000100605
ITPK1	0.226366	0.179776	0.923	0.429	1	0.875258	0.0578637	ENSG00000274958
ITPKB	0.445991	0.639209	0.923	0.714	1	0.875258	0.0578637	ENSG00000143772
ITPKC	0.324033	0.386954	0.923	0.714	1	0.875258	0.0578637	ENSG00000086544
IVNS1ABP	0.6694	0.0706575	0.923	1	1	0.875258	0.0578637	ENSG00000116679
JAZF1	0.429006	0.065497	0.692	0.429	1	0.875258	0.0578637	ENSG00000153814
JCHAIN	0.371507	0.476562	0.462	0	1	0.875258	0.0578637	ENSG00000132465
JDP2	0.391459	0.588613	0.923	0.714	1	0.875258	0.0578637	ENSG00000140044
JKAMP	0.410959	0.138566	0.923	0.429	1	0.875258	0.0578637	ENSG00000050130
KALRN	0.524055	0.470402	0.923	0.857	1	0.875258	0.0578637	ENSG00000160145
KATNA1	0.627371	0.329592	0.923	0.429	1	0.875258	0.0578637	ENSG00000186625
KCND3	0.623874	0.115356	0.077	0	1	0.875258	0.0578637	ENSG00000171385
KCNN4	0.3081	0.348843	0.692	0.143	1	0.875258	0.0578637	ENSG00000104783
KCTD17	0.523198	0.0911614	0.769	0.286	1	0.875258	0.0578637	ENSG00000100379
KCTD2	0.649521	0.447061	0.846	0.286	1	0.875258	0.0578637	ENSG00000180901
KDELR1	0.395276	1.02301	1	0.429	1	0.875258	0.0578637	ENSG00000105438
KDM1A	0.499706	0.399035	0.769	0.286	1	0.875258	0.0578637	ENSG00000004487
KDR	0.530239	0.0195311	0.923	0.857	1	0.875258	0.0578637	ENSG00000128052
KIAA0040	0.42308	0.121873	0.769	0.429	1	0.875258	0.0578637	ENSG00000235750
KIAA1191	0.349784	0.868919	0.846	0.286	1	0.875258	0.0578637	ENSG00000122203
KIAA1586	0.526747	0.17993	0.846	0.429	1	0.875258	0.0578637	ENSG00000168116
KIAA1671	0.291987	0.513032	0.923	0.571	1	0.875258	0.0578637	ENSG00000197077
KIF1C	0.236714	0.0106409	0.923	0.857	1	0.875258	0.0578637	ENSG00000129250
KIF27	0.349407	0.0256454	0.692	0.286	1	0.875258	0.0578637	ENSG00000165115
KIF6	0.694296	0.138834	0.154	0	1	0.875258	0.0578637	ENSG00000164627
KIF9	0.501466	0.363476	0.846	0.714	1	0.875258	0.0578637	ENSG00000088727
KLC1	0.367195	0.509157	1	1	1	0.875258	0.0578637	ENSG00000126214
KLC2	0.574465	0.344563	0.846	0.143	1	0.875258	0.0578637	ENSG00000174996
KLF3	0.253063	0.416538	1	1	1	0.875258	0.0578637	ENSG00000109787
KLF9	0.63678	0.233187	1	1	1	0.875258	0.0578637	ENSG00000119138
KLHDC8B	0.653044	0.406104	0.923	0.429	1	0.875258	0.0578637	ENSG00000185909
KLHL13	0.623874	0.115356	0.077	0	1	0.875258	0.0578637	ENSG00000003096
KLHL15	0.410709	0.439408	0.769	0.286	1	0.875258	0.0578637	ENSG00000174010
KMT5B	0.657276	0.57433	0.923	0.571	1	0.875258	0.0578637	ENSG00000110066
KPNA2	0.449969	0.0917934	0.846	0.571	1	0.875258	0.0578637	ENSG00000182481
KPNA3	0.299346	0.268423	0.846	0.714	1	0.875258	0.0578637	ENSG00000102753
KPNB1	0.345064	1.00876	1	0.714	1	0.875258	0.0578637	ENSG00000108424
KRAS	0.354059	0.323771	0.846	0.857	1	0.875258	0.0578637	ENSG00000133703
KRT10	0.559117	0.266242	0.923	1	1	0.875258	0.0578637	ENSG00000186395
KTN1	0.447927	0.614251	1	0.857	1	0.875258	0.0578637	ENSG00000126777
KXD1	0.644991	0.475875	0.923	0.429	1	0.875258	0.0578637	ENSG00000105700
LAMB1	0.616362	1.0809	1	0.429	1	0.875258	0.0578637	ENSG00000091136
LAMB3	0.587675	0.165208	0.308	0	1	0.875258	0.0578637	ENSG00000196878
LAMC1	0.314725	1.33194	0.923	0.429	1	0.875258	0.0578637	ENSG00000135862
LAMTOR3	0.227334	0.159096	0.846	0.714	1	0.875258	0.0578637	ENSG00000109270
LAMTOR5	0.372532	0.280762	1	0.714	1	0.875258	0.0578637	ENSG00000134248
LANCL2	0.395024	0.369177	0.846	0.429	1	0.875258	0.0578637	ENSG00000132434
LAPTM4A	0.612247	0.523954	1	0.857	1	0.875258	0.0578637	ENSG00000068697
LARP1B	0.641085	0.903534	0.923	0.143	1	0.875258	0.0578637	ENSG00000138709
LATS2	0.60569	0.534945	0.769	0.429	1	0.875258	0.0578637	ENSG00000150457
LAYN	0.40467	0.52501	0.692	0.429	1	0.875258	0.0578637	ENSG00000204381
LBP	0.35368	0.0527738	0.308	0.286	1	0.875258	0.0578637	ENSG00000129988
LBR	0.422237	0.118252	1	0.714	1	0.875258	0.0578637	ENSG00000143815
LCAT	0.379573	0.435023	0.846	0.429	1	0.875258	0.0578637	ENSG00000213398
[truncated: 13,835 more rows]
